# Supplementary material for: Cooperative reactivity of halomethanes and -silanes at an A-frame complex: transannular addition versus bridging tetrylenes
Source: Royal Society of Chemistry journal article supplement (doi:10.1039/d6sc00337k), 2026-04-15
Supplement: d6sc00337k1.pdf [file d6sc00337k1.pdf]

**Supporting Information for:**

**Cooperative Reactivity of Halomethanes and -silanes at an A-Frame Complex: Transannular Addition versus Bridging Tetrylenes**

Max Passargus,<sup>a,b</sup> Celine Nieuwland,<sup>c</sup> Merle Arrowsmith,<sup>a,b</sup> F. Matthias Bickelhaupt,<sup>\*c,d,e</sup> and Holger Braunschweig<sup>\*a,b</sup>

<sup>a</sup> Institute for Inorganic Chemistry, Julius-Maximilians-Universität Würzburg, Am Hubland, 97074 Würzburg, Germany. <sup>b</sup> Institute for Sustainable Chemistry & Catalysis with Boron, Julius-Maximilians-Universität Würzburg, Am Hubland, 97074 Würzburg, Germany. <sup>c</sup> Department of Chemistry and Pharmaceutical Sciences, Amsterdam Institute of Molecular and Life Sciences (AIMMS), Vrije Universiteit Amsterdam, De Boelelaan 1108, 1081 HZ Amsterdam, The Netherlands. <sup>d</sup> Institute for Molecules and Materials, Radboud University, Heyendaalseweg 135, 6525 AJ Nijmegen, The Netherlands. <sup>e</sup> Department of Chemical Sciences, University of Johannesburg, Auckland Park, Johannesburg 2006, South Africa.

**Contents**

|                                    |     |
|------------------------------------|-----|
| Methods and materials .....        | 2   |
| Synthetic procedures .....         | 3   |
| NMR spectra of new compounds ..... | 11  |
| Crystallographic data.....         | 75  |
| Computational details.....         | 87  |
| References .....                   | 114 |

## Methods and materials

All manipulations were performed under an atmosphere of dry argon or in vacuo using standard Schlenk line or glovebox techniques. Deuterated solvents were dried over molecular sieves and degassed by three freeze-pump-thaw cycles before use. All other solvents were distilled and degassed from appropriate drying agents. Solvents (both deuterated and non-deuterated) were stored under argon over activated 4 Å molecular sieves. NMR spectra were acquired on a Bruker Avance 500 NMR spectrometer ( $^1\text{H}$  and  $^1\text{H}\{^{31}\text{P}\}$ : 500.1 MHz,  $^{11}\text{B}\{^1\text{H}\}$ : 160.5 MHz,  $^{13}\text{C}\{^1\text{H}\}$ : 125.8 MHz,  $^{31}\text{P}\{^1\text{H}\}$ : 202.5 MHz,  $^{29}\text{Si}\{^1\text{H}\}$ : 99.4 MHz,  $^{195}\text{Pt}\{^1\text{H}\}$ : 107.5 MHz), Bruker Avance 400 NMR spectrometer ( $^{11}\text{B}\{^1\text{H}\}$ : 128.4 MHz,  $^{31}\text{P}\{^1\text{H}\}$ : 162.2 MHz) and Bruker Avance 600 NMR spectrometer ( $^1\text{H}$  and  $^1\text{H}\{^{31}\text{P}\}$ : 600.2 MHz,  $^{11}\text{B}\{^1\text{H}\}$ : 192.6 MHz,  $^{13}\text{C}\{^1\text{H}\}$ : 150.9 MHz,  $^{31}\text{P}\{^1\text{H}\}$ : 243.0 MHz,  $^{29}\text{Si}\{^1\text{H}\}$ : 119.2 MHz,  $^{195}\text{Pt}\{^{11}\text{B}, ^1\text{H}\}$ : 129.0 MHz). Chemical shifts ( $\delta$ ) are given in ppm and internally referenced to the carbon nuclei ( $^{13}\text{C}\{^1\text{H}\}$ ) or residual protons ( $^1\text{H}$ ) of the solvent. The  $^{11}\text{B}\{^1\text{H}\}$ ,  $^{31}\text{P}\{^1\text{H}\}$ ,  $^{29}\text{Si}\{^1\text{H}\}$  and  $^{195}\text{Pt}\{^{11}\text{B}, ^1\text{H}\}$  spectra were referenced to  $[\text{BF}_3\cdot\text{OEt}_2]$ , 85%  $\text{H}_3\text{PO}_4$ ,  $\text{SiMe}_4$  and  $\text{Na}_2[\text{PtCl}_6]$ , respectively, as external standards. NMR multiplicities are given as s (singlet), t (triplet), tt (triplet of triplets), ttt (triplet of triplets of triplets), quint (quintet), m (multiplet), app (apparent), br (broad),  $n_{\text{+sat}}$  ( $n$  + satellites). Microanalyses (C, H, N) were performed on an Elementar vario MICRO cube elemental analyzer. High-resolution mass spectrometry (HRMS) data were obtained from a Thermo Scientific Exactive Plus spectrometer. Solvents and reagents were purchased from Sigma Aldrich, Alfa Aesar, Fluorochem or TCI and transferred to the glovebox for use. Compound **1** was synthesised following a literature procedure.<sup>1</sup>

## Synthetic procedures

### General remarks

The isolated complexes systematically slowly decomposed under reduced pressure or in solution, independent of the choice of solvent. The major decomposition product was always the corresponding dihalodiplatinum(I) complex  $[(\mu\text{-dmpm})_2\text{Pt}_2\text{X}_2]$  ( $\text{X} = \text{Cl}$ :  $\delta_{31\text{P}} = -19.3$  ( $m_{+\text{sat}}$ ,  $^1J_{\text{P-Pt}} = 2654$  Hz) ppm;  $\delta_{195\text{Pt}} = 4766$  ( $s_{+\text{sat}}$ ) ppm);<sup>2</sup>  $\text{X} = \text{Br}$ :  $\delta_{31\text{P}} = -23.4$  ( $m_{+\text{sat}}$ ,  $^1J_{\text{P-Pt}} = 2640$  Hz) ppm;<sup>1</sup>  $\text{X} = \text{I}$ :  $\delta_{31\text{P}} = -31.4$  ( $m_{+\text{sat}}$ ,  $^1J_{\text{P-Pt}} = 2258$  Hz) ppm<sup>3</sup>). The fate of the extruded (in)organic fragments could not be determined as the other byproduct(s) precipitated as amorphous colourless solids, which proved insoluble in all solvents.

### Synthesis of $2^{\text{CH}_2\text{-Cl}}$

In a vial (5 mL), complex **1** (20.0 mg, 23.5  $\mu\text{mol}$ ) was dissolved in benzene (0.7 mL) and one equiv. of dichloromethane (DCM, 2.00 mg, 23.5  $\mu\text{mol}$ ) was added. The mixture was stirred for 5 min at rt, resulting in a yellow suspension. After evaporating the volatiles at ambient pressure, the residual solid was washed with pentane (3 x 2 mL) and benzene (2 x 2 mL). Recrystallisation from DCM/pentane yielded complex  $2^{\text{CH}_2\text{-Cl}}$  as a yellow solid (13.1 mg, 17.5  $\mu\text{mol}$ , 75%).  $^1\text{H}$  NMR (500.1 MHz,  $\text{CD}_2\text{Cl}_2$ , 298 K):  $\delta = 2.62\text{--}2.52$  (m, 2H,  $\text{P}_2\text{CH}_2$ ), 1.85–1.68 (m, 2H,  $\text{P}_2\text{CH}_2$ ), 1.71 ( $s_{+\text{sat}}$ ,  $^3J_{\text{H-Pt}} = 27.5$  Hz, 12H,  $\text{PCH}_3$ ), 1.66 ( $s_{+\text{sat}}$ ,  $^3J_{\text{H-Pt}} = 33.9$  Hz, 12H,  $\text{PCH}_3$ ), 0.87 (quint $_{+\text{sat}}$ ,  $^3J_{\text{H-P}} = 9.0$  Hz,  $^2J_{\text{H-Pt}} = 57.8$  Hz, 2H,  $\text{Pt}_2\text{CH}_2$ ) ppm.  $^{13}\text{C}\{^1\text{H}\}$  NMR (125.8 MHz,  $\text{CD}_2\text{Cl}_2$ , 298 K):  $\delta = 22.0$  (m,  $\text{P}_2\text{CH}_2$ ), 15.2 (m,  $\text{PCH}_3$ ), 13.8 (m,  $\text{PCH}_3$ ), -14.5 (quint $_{+\text{sat}}$ ,  $^2J_{\text{C-P}} = 3.9$  Hz,  $^1J_{\text{C-Pt}} = 613$  Hz,  $\text{Pt}_2\text{CH}_2$ ) ppm.  $^{31}\text{P}\{^1\text{H}\}$  NMR (202.5 MHz,  $\text{CD}_2\text{Cl}_2$ , 298 K):  $\delta = -7.3$  ( $s_{+\text{sat}}$ ,  $^1J_{\text{P-Pt}} = 3072$  Hz,  $^3J_{\text{P-Pt}} = 73$  Hz,  $^2J_{\text{Pt-Pt}} = 842$  Hz) ppm.  $^{195}\text{Pt}\{^1\text{H}\}$  NMR (107.5 MHz,  $\text{CD}_2\text{Cl}_2$ , 298 K):  $\delta = -4267$  (tt $_{+\text{sat}}$ ,  $^1J_{\text{Pt-P}} = 3072$  Hz,  $^3J_{\text{Pt-P}} = 73$  Hz,  $^2J_{\text{Pt-Pt}} = 842$  Hz) ppm. Elemental analysis (%) calculated for  $[\text{C}_{11}\text{H}_{30}\text{Cl}_2\text{P}_4\text{Pt}_2]$  ( $M_w = 747.3$ ): C 17.68, H 4.05; found: C 17.99, H 3.99.

### Synthesis of $2^{\text{CH}_2\text{-Br}}$

In a vial (5 mL), complex **1** (20.0 mg, 23.5  $\mu\text{mol}$ ) was dissolved in benzene (0.7 mL), then one equiv. dibromomethane (DBM, 4.09 mg, 23.5  $\mu\text{mol}$ ) was added. The mixture was stirred for 5 min at rt, resulting in a yellow suspension. After evaporating the volatiles at ambient pressure, the residual solid was washed with pentane (3 x 2 mL) and benzene (2 x 2 mL). Recrystallisation from DCM/pentane yielded complex  $2^{\text{CH}_2\text{-Br}}$  as a yellow solid (18.3 mg, 21.9  $\mu\text{mol}$ , 75%). *Note: the synthesis systematically yielded a yellow byproduct, which proved*

insoluble in all common organic solvents, and was identified by single-crystal X-ray diffraction (SCXRD) analysis as the product of the twofold addition of DMB across both Pt centers, complex **2<sup>CH2</sup>-Br**. The reaction of **1** with an excess of DBM did not result in improved yields of **2<sup>CH2</sup>-Br**. <sup>1</sup>H NMR (600.2 MHz, CD<sub>2</sub>Cl<sub>2</sub>, 298 K): δ = 2.67–2.59 (m, 2H, P<sub>2</sub>CH<sub>2</sub>), 1.80 (s<sub>+sat</sub>, <sup>3</sup>J<sub>H-Pt</sub> = 27.6 Hz, 12H, PCH<sub>3</sub>), 1.77–1.71 (m, 2H, P<sub>2</sub>CH<sub>2</sub>), 1.69 (s<sub>+sat</sub>, <sup>3</sup>J<sub>H-Pt</sub> = 33.6 Hz, 12H, PCH<sub>3</sub>), 1.07 (quint<sub>+sat</sub>, <sup>3</sup>J<sub>H-P</sub> = 9.1 Hz, <sup>2</sup>J<sub>H-Pt</sub> = 56.7 Hz, 2H, Pt<sub>2</sub>CH<sub>2</sub>) ppm. <sup>13</sup>C{<sup>1</sup>H} NMR (150.9 MHz, CD<sub>2</sub>Cl<sub>2</sub>, 298 K): δ = 21.1 (m, P<sub>2</sub>CH<sub>2</sub>), 15.6 (m, PCH<sub>3</sub>), 15.5 (m, PCH<sub>3</sub>), –7.6 (quint<sub>+sat</sub>, <sup>2</sup>J<sub>C-P</sub> = 3.7 Hz, <sup>1</sup>J<sub>C-Pt</sub> = 617 Hz, Pt<sub>2</sub>CH<sub>2</sub>) ppm. <sup>31</sup>P{<sup>1</sup>H} NMR (243.0 MHz, CD<sub>2</sub>Cl<sub>2</sub>, 298 K): δ = –9.6 (s<sub>+sat</sub>, <sup>1</sup>J<sub>P-Pt</sub> = 3036 Hz, <sup>3</sup>J<sub>P-Pt</sub> = 71 Hz, <sup>2</sup>J<sub>Pt-Pt</sub> = 831 Hz) ppm. <sup>195</sup>Pt{<sup>1</sup>H} NMR (129.0 MHz, CD<sub>2</sub>Cl<sub>2</sub>, 298 K): δ = –4397 (tt<sub>+sat</sub>, <sup>1</sup>J<sub>P-Pt</sub> = 3036 Hz, <sup>3</sup>J<sub>P-Pt</sub> = 71 Hz, <sup>2</sup>J<sub>Pt-Pt</sub> = 831 Hz) ppm. Elemental analysis (%) calculated for [C<sub>11</sub>H<sub>30</sub>Br<sub>2</sub>P<sub>4</sub>Pt<sub>2</sub>] (M<sub>w</sub> = 836.2): C 15.80, H 3.62; found: C 15.95, H 3.47.

### Synthesis of **2<sup>CH2</sup>-I**

In a vial (5 mL), complex **2<sup>CH2</sup>-Br** (20.0 mg, 23.9 μmol) was suspended in benzene (0.7 mL), then three equiv. of trimethylsilyl iodide (TMSI, 14.4 mg, 71.8 μmol) were added. The resulting mixture was stirred for 5 min at rt, resulting in a red suspension. After evaporating the volatiles at ambient pressure, the residual solid was washed with pentane (3 x 2 mL) and benzene (2 x 2 mL). Recrystallisation from DCM/pentane afforded complex **2<sup>CH2</sup>-I** as a brown solid (21.6 mg, 23.2 μmol, 97%). *Note: this synthetic route to **2<sup>CH2</sup>-I** proved more reliable than the reaction of **1** with one equiv. CH<sub>2</sub>I<sub>2</sub>.* <sup>1</sup>H NMR (500.1 MHz, CD<sub>2</sub>Cl<sub>2</sub>, 298 K): δ = 2.78–2.68 (m, 2H, P<sub>2</sub>CH<sub>2</sub>), 1.94 (s<sub>+sat</sub>, <sup>3</sup>J<sub>H-Pt</sub> = 28.5 Hz, 12H, PCH<sub>3</sub>), 1.76–1.63 (m, 2H, P<sub>2</sub>CH<sub>2</sub>), 1.74 (s<sub>+sat</sub>, <sup>3</sup>J<sub>H-Pt</sub> = 33.5 Hz, 12H, PCH<sub>3</sub>), 1.47 (quint<sub>+sat</sub>, <sup>3</sup>J<sub>H-P</sub> = 9.2 Hz, <sup>2</sup>J<sub>H-Pt</sub> = 55.0 Hz, 2H, Pt<sub>2</sub>CH<sub>2</sub>) ppm. <sup>13</sup>C{<sup>1</sup>H} NMR (125.8 MHz, CD<sub>2</sub>Cl<sub>2</sub>, 298 K): δ = 19.5 (m, P<sub>2</sub>CH<sub>2</sub>), 19.1 (m, PCH<sub>3</sub>), 16.2 (m, PCH<sub>3</sub>), 4.5 (quint, <sup>2</sup>J<sub>C-P</sub> = 3.9 Hz, Pt<sub>2</sub>CH<sub>2</sub>) ppm. <sup>31</sup>P{<sup>1</sup>H} NMR (202.5 MHz, CD<sub>2</sub>Cl<sub>2</sub>, 298 K): δ = –13.2 (s<sub>+sat</sub>, <sup>1</sup>J<sub>P-Pt</sub> = 2982 Hz, <sup>3</sup>J<sub>P-Pt</sub> = 68 Hz, <sup>2</sup>J<sub>Pt-Pt</sub> = 754 Hz) ppm. <sup>195</sup>Pt{<sup>1</sup>H} NMR (107.5 MHz, CD<sub>2</sub>Cl<sub>2</sub>, 298 K): δ = –4645 (tt<sub>+sat</sub>, <sup>1</sup>J<sub>Pt-P</sub> = 298 Hz, <sup>3</sup>J<sub>Pt-P</sub> = 68 Hz, <sup>2</sup>J<sub>Pt-Pt</sub> = 754 Hz) ppm. Elemental analysis (%) calculated for [C<sub>11</sub>H<sub>30</sub>I<sub>2</sub>P<sub>4</sub>Pt<sub>2</sub>] (M<sub>w</sub> = 930.2): C 14.20, H 3.25; found: C 14.23, H 3.00.

### Synthesis of **2<sup>CCl2</sup>-Cl**

In a vial (5 mL), complex **1** (20.0 mg, 23.5 μmol) was dissolved in benzene (0.7 mL) and one equiv. of tetrachloromethane (2.28 μL, 23.5 μmol) was added. The mixture was stirred for 5 min at rt, resulting in an orange suspension. After evaporating the volatiles at ambient pressure,

the residual solid was washed with pentane (3 x 2 mL) and benzene (2 x 2 mL), yielding **2<sup>CCl2</sup>-Cl** as an orange solid (17.4 mg, 21.3  $\mu\text{mol}$ , 91%). *Note: 2<sup>CCl2</sup>-Cl is only sparingly soluble in CDCl<sub>3</sub> and undergoes complete decomposition within two days in solution. Owing to its rapid degradation, it could not be fully characterised.* <sup>1</sup>H NMR (500.1 MHz, CD<sub>2</sub>Cl<sub>2</sub>, 298 K):  $\delta$  = 3.68–3.47 (m, 2H, P<sub>2</sub>CH<sub>2</sub>), 1.97 (s<sub>+sat</sub>, <sup>3</sup>J<sub>H-Pt</sub> = 40.0 Hz, 12H, PCH<sub>3</sub>), 1.86–1.78 (m, 2H, P<sub>2</sub>CH<sub>2</sub>), 1.82 (s<sub>+sat</sub>, <sup>3</sup>J<sub>H-Pt</sub> = 27.2 Hz, 12H, PCH<sub>3</sub>) ppm. <sup>13</sup>C{<sup>1</sup>H} NMR (125.8 MHz, CD<sub>2</sub>Cl<sub>2</sub>, 298 K):  $\delta$  = 20.3 (m, P<sub>2</sub>CCl<sub>2</sub>), 13.0 (m, PCH<sub>3</sub>), 11.8 (m, PCH<sub>3</sub>) ppm. <sup>31</sup>P{<sup>1</sup>H} NMR (202.5 MHz, CDCl<sub>3</sub>, 298 K):  $\delta$  = -8.7 (s<sub>+sat</sub>, <sup>1</sup>J<sub>P-Pt</sub> = 2750 Hz, <sup>3</sup>J<sub>P-Pt</sub> = 150 Hz) ppm. <sup>195</sup>Pt{<sup>1</sup>H} NMR (107.5 MHz, CD<sub>2</sub>Cl<sub>2</sub>, 298 K):  $\delta$  = -4013 (t, <sup>1</sup>J<sub>P-Pt</sub> = 2750 Hz, detected by <sup>1</sup>H-<sup>195</sup>Pt HMQC) ppm.

### Synthesis of **3<sup>SiMe3</sup>-Cl**

In a vial (5 mL), complex **1** (20.0 mg, 23.5  $\mu\text{mol}$ ) was dissolved in benzene (0.7 mL), then one equiv. of chlorotrimethylsilane (TMSCl, 2.55 mg, 23.5  $\mu\text{mol}$ ) was added. The resulting mixture was heated to 60 °C for 16 h. After evaporating the volatiles at ambient pressure, the residual solid was washed with pentane (3 x 2 mL). Recrystallisation from 1,2-difluorobenzene (*o*-DFB)/pentane afforded complex **3<sup>SiMe3</sup>-Cl** as a brownish solid (14.4 mg, 18.2  $\mu\text{mol}$ , 77%). <sup>1</sup>H NMR (500.1 MHz, C<sub>6</sub>D<sub>6</sub>, 298 K):  $\delta$  = 2.36–2.14 (m, 4H, P<sub>2</sub>CH<sub>2</sub>), 1.50 (t<sub>+sat</sub>, <sup>2</sup>J<sub>H-P</sub> = 3.1 Hz, <sup>3</sup>J<sub>H-Pt</sub> = 32.9 Hz, 12H, PCH<sub>3</sub>), 1.35 (t<sub>+sat</sub>, <sup>2</sup>J<sub>H-P</sub> = 3.1 Hz, <sup>3</sup>J<sub>H-Pt</sub> = 32.4 Hz, 12H, PCH<sub>3</sub>), 0.45 (s<sub>+sat</sub>, <sup>2</sup>J<sub>H-Si</sub> = 9.5 Hz, 9H, SiCH<sub>3</sub>) ppm. <sup>13</sup>C{<sup>1</sup>H} NMR (125.8 MHz, C<sub>6</sub>D<sub>6</sub>, 298 K):  $\delta$  = 44.7 (t, <sup>1</sup>J<sub>C-P</sub> = 19.2 Hz, P<sub>2</sub>CH<sub>2</sub>), 19.9 (app. tt, <sup>1</sup>J<sub>C-P</sub> = 18.5 Hz, <sup>3</sup>J<sub>C-P</sub> = 3.3 Hz, PCH<sub>3</sub>), 15.2 (app. tt, <sup>1</sup>J<sub>C-P</sub> = 17.0 Hz, <sup>3</sup>J<sub>C-P</sub> = 2.7 Hz, PCH<sub>3</sub>), 9.2 (t<sub>+sat</sub>, <sup>3</sup>J<sub>C-P</sub> = 3.2 Hz, <sup>1</sup>J<sub>C-Si</sub> = 61.7 Hz, SiCH<sub>3</sub>) ppm. <sup>29</sup>Si{<sup>1</sup>H} NMR (99.4 MHz, C<sub>6</sub>D<sub>6</sub>, 298 K):  $\delta$  = -10.9 (tt<sub>+sat</sub>, <sup>2</sup>J<sub>Si-P</sub> = 10.2 Hz, <sup>3</sup>J<sub>Si-P</sub> = 2.4 Hz, <sup>1</sup>J<sub>Si-Pt</sub> = 994 Hz, <sup>2</sup>J<sub>Si-Pt</sub> = 273 Hz, SiCH<sub>3</sub>) ppm. <sup>31</sup>P{<sup>1</sup>H} NMR (202.5 MHz, C<sub>6</sub>D<sub>6</sub>, 298 K):  $\delta$  = -15.6 (m<sub>+sat</sub>, <sup>1</sup>J<sub>P-Pt</sub> = 3160 Hz, <sup>2</sup>J<sub>P-Pt</sub> = 48 Hz, 2P, P<sub>2</sub>PtCl), -25.7 (m<sub>+sat</sub>, <sup>1</sup>J<sub>P-Pt</sub> = 2671 Hz, <sup>2</sup>J<sub>P-Pt</sub> = 122 Hz, 2P, P<sub>2</sub>PtSi) ppm. <sup>195</sup>Pt{<sup>1</sup>H} NMR (107.5 MHz, C<sub>6</sub>D<sub>6</sub>, 298 K):  $\delta$  = -4317 (tt<sub>+sat</sub>, <sup>1</sup>J<sub>Pt-P</sub> = 3160 Hz, <sup>2</sup>J<sub>Pt-P</sub> = 122 Hz, <sup>1</sup>J<sub>Pt-Pt</sub> = 3060 Hz, 1Pt, P<sub>2</sub>PtCl), -4798 (tt<sub>+sat</sub>, <sup>1</sup>J<sub>Pt-P</sub> = 2671 Hz, <sup>2</sup>J<sub>Pt-P</sub> = 48 Hz, <sup>1</sup>J<sub>Pt-Pt</sub> = 3060 Hz, 1Pt, P<sub>2</sub>PtSi) ppm. Elemental analysis (%) calculated for [C<sub>13</sub>H<sub>37</sub>ClP<sub>4</sub>Pt<sub>2</sub>Si] (M<sub>w</sub> = 771.0): C 20.25, H 4.84, found: C 20.19, H 4.69.

### Synthesis of **3<sup>SiMe3</sup>-I**

In a vial (5 mL), complex **1** (20.0 mg, 23.5  $\mu\text{mol}$ ) was dissolved in benzene (0.7 mL), then one equiv. of TMSI (4.70 mg, 23.5  $\mu\text{mol}$ ) was added. The resulting mixture was stirred for 3 d at rt. After evaporating the volatiles at ambient pressure, the residual solid was washed with

pentane (3 x 2 mL). Recrystallisation from benzene/pentane yielded complex **3<sup>SiMe3</sup>-I** as an orange solid (10.5 mg, 12.2 μmol, 52%). <sup>1</sup>H NMR (500.1 MHz, C<sub>6</sub>D<sub>6</sub>, 298 K): δ = 2.38–2.17 (m, 4H, P<sub>2</sub>CH<sub>2</sub>), 1.53 (t<sub>sat</sub>, <sup>2</sup>J<sub>H-P</sub> = 3.1 Hz, <sup>3</sup>J<sub>H-Pt</sub> = 32.9 Hz, 12H, PCH<sub>3</sub>), 1.43 (t<sub>sat</sub>, <sup>2</sup>J<sub>H-P</sub> = 3.1 Hz, <sup>3</sup>J<sub>H-Pt</sub> = 32.2 Hz, 12H, PCH<sub>3</sub>), 0.44 (s<sub>sat</sub>, <sup>2</sup>J<sub>H-Si</sub> = 10.1 Hz, 9H, SiCH<sub>3</sub>) ppm. <sup>13</sup>C {<sup>1</sup>H} NMR (125.8 MHz, C<sub>6</sub>D<sub>6</sub>, 298 K): δ = 44.2 (m, P<sub>2</sub>CH<sub>2</sub>), 19.2 (app. tt, <sup>1</sup>J<sub>C-P</sub> = 18.8 Hz, <sup>3</sup>J<sub>C-P</sub> = 3.6 Hz, PCH<sub>3</sub>), 18.7 (app. tt, <sup>1</sup>J<sub>C-P</sub> = 17.5 Hz, <sup>3</sup>J<sub>C-P</sub> = 2.8 Hz, PCH<sub>3</sub>), 9.2 (t<sub>sat</sub>, <sup>3</sup>J<sub>C-P</sub> = 3.5 Hz, <sup>1</sup>J<sub>C-Si</sub> = 63.5 Hz, SiCH<sub>3</sub>) ppm. <sup>29</sup>Si {<sup>1</sup>H} NMR (99.4 MHz, C<sub>6</sub>D<sub>6</sub>, 298 K): δ = -10.1 (tt<sub>sat</sub>, <sup>2</sup>J<sub>Si-P</sub> = 9.5 Hz, <sup>3</sup>J<sub>Si-P</sub> = 4.1 Hz, <sup>1</sup>J<sub>Si-Pt</sub> = 994 Hz, <sup>2</sup>J<sub>Si-Pt</sub> = 286 Hz, SiCH<sub>3</sub>) ppm. <sup>31</sup>P {<sup>1</sup>H} NMR (202.5 MHz, C<sub>6</sub>D<sub>6</sub>, 298 K): δ = -21.4 (m<sub>sat</sub>, <sup>1</sup>J<sub>P-Pt</sub> = 3132 Hz, <sup>2</sup>J<sub>P-Pt</sub> = 57 Hz, 2P, P<sub>2</sub>PtI), -26.5 (m<sub>sat</sub>, <sup>1</sup>J<sub>P-Pt</sub> = 2656 Hz, <sup>2</sup>J<sub>P-Pt</sub> = 116 Hz, 2P, P<sub>2</sub>PtSi) ppm. <sup>195</sup>Pt {<sup>1</sup>H} NMR (107.5 MHz, C<sub>6</sub>D<sub>6</sub>, 298 K): δ = -4686 (tt<sub>sat</sub>, <sup>1</sup>J<sub>Pt-P</sub> = 3153 Hz, <sup>2</sup>J<sub>Pt-P</sub> = 116 Hz, 1Pt, P<sub>2</sub>PtI), -4755 (tt<sub>sat</sub>, <sup>1</sup>J<sub>Pt-P</sub> = 2675 Hz, <sup>2</sup>J<sub>Pt-P</sub> = 57 Hz, 1Pt, P<sub>2</sub>PtSi) ppm. Elemental analysis (%) calculated for [C<sub>13</sub>H<sub>37</sub>IP<sub>4</sub>Pt<sub>2</sub>Si·(C<sub>6</sub>H<sub>6</sub>)<sub>0.1</sub>] (M<sub>w</sub> = 870.3): C 18.65, H 4.30, found: C 18.77, H 4.35.

### Synthesis of **3<sup>SiMe2Cl</sup>-Cl**

In a vial (5 mL), complex **1** (20.0 mg, 23.5 μmol) was dissolved in benzene (0.7 mL), then one equiv. of dichlorodimethylsilane (3.03 mg, 23.5 μmol) was added. The resulting mixture was stirred for 2 d at rt. After evaporating the volatiles at ambient pressure, the residual solid was washed with pentane (3 x 2 mL). Recrystallisation from benzene/pentane yielded **3<sup>SiMe2Cl</sup>-Cl** as an off-white solid (14.2 mg, 17.9 μmol, 76%). <sup>1</sup>H NMR (600.2 MHz, C<sub>6</sub>D<sub>6</sub>, 298 K): δ = 2.33–2.15 (m, 4H, P<sub>2</sub>CH<sub>2</sub>), 1.55 (t<sub>sat</sub>, <sup>2</sup>J<sub>H-P</sub> = 3.0 Hz, <sup>3</sup>J<sub>H-Pt</sub> = 32.2 Hz, 12H, PCH<sub>3</sub>), 1.32 (t<sub>sat</sub>, <sup>2</sup>J<sub>H-P</sub> = 3.0 Hz, <sup>3</sup>J<sub>H-Pt</sub> = 31.4 Hz, 12H, PCH<sub>3</sub>), 0.83 (s<sub>sat</sub>, <sup>2</sup>J<sub>H-Si</sub> = 7.9 Hz, 6H, SiCH<sub>3</sub>) ppm. <sup>13</sup>C {<sup>1</sup>H} NMR (150.9 MHz, C<sub>6</sub>D<sub>6</sub>, 298 K): δ = 44.2 (t, <sup>1</sup>J<sub>C-P</sub> = 18.8 Hz, P<sub>2</sub>CH<sub>2</sub>), 19.7 (m, PCH<sub>3</sub>), 15.2 (m, PCH<sub>3</sub>), 13.8 (t, <sup>3</sup>J<sub>C-P</sub> = 2.1 Hz, SiCH<sub>3</sub>) ppm. <sup>29</sup>Si {<sup>1</sup>H} NMR (119.2 MHz, C<sub>6</sub>D<sub>6</sub>, 298 K): δ = 38.5 (t<sub>sat</sub>, <sup>2</sup>J<sub>Si-P</sub> = 12 Hz, <sup>1</sup>J<sub>Si-Pt</sub> = 1269 Hz, <sup>2</sup>J<sub>Si-Pt</sub> = 398 Hz, SiCH<sub>3</sub>) ppm. <sup>31</sup>P {<sup>1</sup>H} NMR (243.0 MHz, C<sub>6</sub>D<sub>6</sub>, 298 K): δ = -17.5 (m<sub>sat</sub>, <sup>1</sup>J<sub>P-Pt</sub> = 3035 Hz, 2P, P<sub>2</sub>PtCl), -26.4 (m<sub>sat</sub>, <sup>1</sup>J<sub>P-Pt</sub> = 2581 Hz, <sup>2</sup>J<sub>P-Pt</sub> = 138 Hz, 2P, P<sub>2</sub>PtSi) ppm. <sup>195</sup>Pt {<sup>1</sup>H} NMR (129.0 MHz, C<sub>6</sub>D<sub>6</sub>, 298 K): δ = -4309 (tt<sub>sat</sub>, <sup>1</sup>J<sub>Pt-P</sub> = 3035 Hz, <sup>2</sup>J<sub>Pt-P</sub> = 138 Hz, <sup>1</sup>J<sub>Pt-Pt</sub> = 3269 Hz, 1Pt, P<sub>2</sub>PtCl), -4748 (tt<sub>sat</sub>, <sup>1</sup>J<sub>Pt-P</sub> = 2581 Hz, <sup>2</sup>J<sub>Pt-P</sub> = 52 Hz, <sup>1</sup>J<sub>Pt-Pt</sub> = 3269 Hz, 1Pt, P<sub>2</sub>PtSi) ppm. Elemental analysis (%) calculated for [C<sub>12</sub>H<sub>34</sub>Cl<sub>2</sub>P<sub>4</sub>Pt<sub>2</sub>Si·(C<sub>6</sub>H<sub>6</sub>)<sub>0.3</sub>] (M<sub>w</sub> = 814.9): C 20.34, H 4.43, found: C 20.37, H 4.36. LIFDI-HRMS (toluene, *m/z*) calculated for C<sub>12</sub>H<sub>34</sub>Cl<sub>2</sub>P<sub>4</sub>Pt<sub>2</sub>Si = [**3<sup>SiMe2Cl</sup>-Cl** + H]<sup>+</sup>: 791.0104; found: 791.0101.

### Synthesis of **3<sup>SiMeCl2</sup>-Cl**

In a vial (5 mL), complex **1** (20.0 mg, 23.5  $\mu\text{mol}$ ) was dissolved in benzene (0.7 mL), then one equiv. of trichloromethylsilane (3.51 mg, 23.5  $\mu\text{mol}$ ) was added. The mixture was stirred for 5 min at rt, resulting in a yellow suspension. After evaporating the volatiles at ambient pressure, the residual solid was washed with pentane (3 x 2 mL). Recrystallisation from *o*-DFB/pentane afforded complex **3<sup>SiMeCl<sub>2</sub></sup>-Cl** as a yellow solid (15.6 mg, 19.7  $\mu\text{mol}$ , 84%). <sup>1</sup>H NMR (500.1 MHz, CD<sub>2</sub>Cl<sub>2</sub>, 298 K):  $\delta$  = 3.18–2.98 (m, 4H, P<sub>2</sub>CH<sub>2</sub>), 2.00 (t<sub>+sat</sub>, <sup>2</sup>J<sub>H-P</sub> = 3.1 Hz, <sup>3</sup>J<sub>H-Pt</sub> = 31.4 Hz, 12H, PCH<sub>3</sub>), 1.59 (t<sub>+sat</sub>, <sup>2</sup>J<sub>H-P</sub> = 3.2 Hz, <sup>3</sup>J<sub>H-Pt</sub> = 31.3 Hz, 12H, PCH<sub>3</sub>), 0.89 (s<sub>+sat</sub>, <sup>2</sup>J<sub>H-Si</sub> = 9.6 Hz, 3H, SiCH<sub>3</sub>) ppm. <sup>13</sup>C {<sup>1</sup>H} NMR (125.8 MHz, CD<sub>2</sub>Cl<sub>2</sub>, 298 K):  $\delta$  = 44.4 (t, <sup>1</sup>J<sub>C-P</sub> = 19.1 Hz, P<sub>2</sub>CH<sub>2</sub>), 20.1 (br m, PCH<sub>3</sub>), 18.8 (s<sub>+sat</sub>, <sup>1</sup>J<sub>C-Si</sub> = 54.8 Hz, SiCH<sub>3</sub>), 15.6 (br m, PCH<sub>3</sub>) ppm. <sup>29</sup>Si {<sup>1</sup>H} NMR (99.4 MHz, CD<sub>2</sub>Cl<sub>2</sub>, 298 K):  $\delta$  = 44.6 (t<sub>+sat</sub>, <sup>2</sup>J<sub>Si-P</sub> = 14 Hz, <sup>1</sup>J<sub>Si-Pt</sub> = 1629 Hz, <sup>2</sup>J<sub>Si-Pt</sub> = 624 Hz, SiCH<sub>3</sub>) ppm. <sup>31</sup>P {<sup>1</sup>H} NMR (202.5 MHz, CD<sub>2</sub>Cl<sub>2</sub>, 298 K):  $\delta$  = –17.7 (m<sub>+sat</sub>, <sup>1</sup>J<sub>P-Pt</sub> = 2930 Hz, <sup>2</sup>J<sub>P-Pt</sub> = 57 Hz, 2P, P<sub>2</sub>PtCl), –26.0 (m<sub>+sat</sub>, <sup>1</sup>J<sub>P-Pt</sub> = 2475 Hz, <sup>2</sup>J<sub>P-Pt</sub> = 154 Hz, 2P, P<sub>2</sub>PtSi) ppm. <sup>195</sup>Pt {<sup>1</sup>H} NMR (107.5 MHz, CD<sub>2</sub>Cl<sub>2</sub>, 298 K):  $\delta$  = –4329 (tt<sub>+sat</sub>, <sup>1</sup>J<sub>Pt-P</sub> = 2930 Hz, <sup>2</sup>J<sub>Pt-P</sub> = 154 Hz, <sup>1</sup>J<sub>Pt-Pt</sub> = 3738 Hz, 1Pt, P<sub>2</sub>PtCl), –4752 (tt<sub>+sat</sub>, <sup>1</sup>J<sub>Pt-P</sub> = 2475 Hz, <sup>2</sup>J<sub>Pt-P</sub> = 57 Hz, <sup>1</sup>J<sub>Pt-Pt</sub> = 3738 Hz, 1Pt, P<sub>2</sub>PtSi) ppm. Elemental analysis (%) calculated for [C<sub>11</sub>H<sub>31</sub>Cl<sub>3</sub>P<sub>4</sub>Pt<sub>2</sub>Si(C<sub>6</sub>H<sub>6</sub>)<sub>0.5</sub>] (M<sub>w</sub> = 850.9): C 19.76, H 4.03, found: C 19.73, H 4.08. LIFDI-HRMS (toluene, *m/z*) calculated for C<sub>11</sub>H<sub>31</sub>Cl<sub>3</sub>P<sub>4</sub>Pt<sub>2</sub>Si = [**3<sup>SiMeCl<sub>2</sub></sup>-Cl**]<sup>+</sup>: 811.9471; found: 811.9467. *Note: The NMR spectra of 3<sup>SiMeCl<sub>2</sub></sup>-Cl show traces (<3%) of [( $\mu$ -dmpm)<sub>2</sub>{(Cl)PtH}{(Cl)PtSiMeCl<sub>2</sub>}] (4<sup>SiMeCl<sub>2</sub></sup>-HCl, identified by comparison with 4<sup>SiCl<sub>3</sub></sup>-HCl, which was characterised by SCXRD), presumably generated by the oxidative addition of trace HCl present in the CD<sub>2</sub>Cl<sub>2</sub> solution to one of the platinum centers ( $\delta_{31\text{P}}$  = –7.2 (m<sub>+sat</sub>, <sup>1</sup>J<sub>Pt-P</sub> = 930 Hz), –13.8 (m<sub>+sat</sub>) ppm;  $\delta_{195\text{Pt}}$  = –4600 (weak t, <sup>1</sup>J<sub>Pt-P</sub> = 2668 Hz) and –4695 (weak m) ppm). 4<sup>SiMeCl<sub>2</sub></sup>-HCl was not detected by HRMS. At 60 °C 3<sup>SiMeCl<sub>2</sub></sup>-Cl partially (16%) rearranges to the silylene-bridged A-frame complex 2<sup>SiMeCl</sup>-Cl ( $\delta_{31\text{P}}$  = –0.1 (m<sub>+sat</sub>, <sup>1</sup>J<sub>Pt-P</sub> = 3261 Hz, <sup>3</sup>J<sub>Pt-P</sub> = 261 Hz), –2.8 (m<sub>+sat</sub>, <sup>1</sup>J<sub>Pt-P</sub> = 3114 Hz, <sup>3</sup>J<sub>Pt-P</sub> = 203 Hz ppm;  $\delta_{195\text{Pt}}$  = –4519 (dddd, <sup>1</sup>J<sub>Pt-P</sub> = 3261, 3114 Hz, <sup>3</sup>J<sub>Pt-P</sub> = 261, 203 Hz) ppm).*

### Synthesis of 3<sup>SiCl<sub>3</sub></sup>-Cl

In a vial (5 mL), complex **1** (20.0 mg, 23.5  $\mu\text{mol}$ ) was dissolved in benzene (0.7 mL), then one equiv. of silicon tetrachloride (3.99 mg, 23.5  $\mu\text{mol}$ ) was added. The resulting mixture was stirred for 5 min at rt, resulting in a yellow suspension. After evaporating the volatiles at ambient pressure, the residual solid was washed with pentane (3 x 2 mL) and benzene (2 x 2 mL). Recrystallisation from benzene/pentane afforded complex **3<sup>SiCl<sub>3</sub></sup>-Cl** as a yellow solid (13.5 mg, 16.2  $\mu\text{mol}$ , 69%). <sup>1</sup>H NMR (500.1 MHz, CD<sub>2</sub>Cl<sub>2</sub>, 298 K):  $\delta$  = 3.22–3.01 (m,

4H, P<sub>2</sub>CH<sub>2</sub>), 2.04 (t<sub>+sat</sub>, <sup>2</sup>J<sub>H-P</sub> = 3.1 Hz, <sup>3</sup>J<sub>H-Pt</sub> = 30.8 Hz, 12H, PCH<sub>3</sub>), 1.61 (t<sub>+sat</sub>, <sup>2</sup>J<sub>H-P</sub> = 3.2 Hz, <sup>3</sup>J<sub>H-Pt</sub> = 30.8 Hz, 12H, PCH<sub>3</sub>) ppm. <sup>13</sup>C{<sup>1</sup>H} NMR (125.8 MHz, CD<sub>2</sub>Cl<sub>2</sub>, 298 K): δ = 44.4 (t, <sup>1</sup>J<sub>C-P</sub> = 18.7 Hz, P<sub>2</sub>CH<sub>2</sub>), 19.8 (br m, PCH<sub>3</sub>), 15.3 (br m, PCH<sub>3</sub>) ppm. <sup>29</sup>Si{<sup>1</sup>H} NMR (99.4 MHz, CD<sub>2</sub>Cl<sub>2</sub>, 298 K): δ = *not detected*. <sup>31</sup>P{<sup>1</sup>H} NMR (202.5 MHz, CD<sub>2</sub>Cl<sub>2</sub>, 298 K): δ = -19.4 (m<sub>+sat</sub>, <sup>1</sup>J<sub>P-Pt</sub> = 2815 Hz, 2P, P<sub>2</sub>PtCl), -26.7 (m<sub>+sat</sub>, <sup>1</sup>J<sub>P-Pt</sub> = 2434 Hz, 2P, P<sub>2</sub>PtSi) ppm. <sup>195</sup>Pt{<sup>1</sup>H} NMR (107.5 MHz, CD<sub>2</sub>Cl<sub>2</sub>, 298 K): δ = -4305 (tt<sub>+sat</sub>, <sup>1</sup>J<sub>Pt-P</sub> = 2815 Hz, <sup>2</sup>J<sub>Pt-P</sub> = 154 Hz, <sup>1</sup>J<sub>Pt-Pt</sub> = 4163 Hz, 1Pt, P<sub>2</sub>PtCl), -4791 (tt<sub>+sat</sub>, <sup>1</sup>J<sub>Pt-P</sub> = 2434 Hz, <sup>2</sup>J<sub>Pt-P</sub> = 62 Hz, <sup>1</sup>J<sub>Pt-Pt</sub> = 4163 Hz, 1Pt, P<sub>2</sub>PtSi) ppm. LIFDI-HRMS (DCM, *m/z*) calculated for C<sub>10</sub>H<sub>28</sub>Cl<sub>4</sub>P<sub>4</sub>Pt<sub>2</sub>Si = [3<sup>SiCl<sub>3</sub></sup>-Cl]<sup>+</sup>: 831.8919; found: 831.8912. *Note: The NMR spectra of 3<sup>SiCl<sub>3</sub></sup>-Cl show traces (<5%) of [(μ-dmpm)<sub>2</sub>{(Cl)PtH}{(Cl)PtSiCl<sub>3</sub>}] (4<sup>SiCl<sub>3</sub></sup>-HCl, identified by SCXRD), presumably generated by the oxidative addition of trace HCl present in the CD<sub>2</sub>Cl<sub>2</sub> solution to one of the platinum centers. 4<sup>SiCl<sub>3</sub></sup>-HCl was not detected by HRMS (δ<sub>31P</sub> = -8.9 (m<sub>+sat</sub>, <sup>1</sup>J<sub>Pt-P</sub> = 1476 Hz), -13.7 (m<sub>+sat</sub>) ppm; δ<sub>195Pt</sub> = -4537 (weak t, <sup>1</sup>J<sub>Pt-P</sub> = 2486 Hz), -4617 (weak m) ppm). Furthermore, 3<sup>SiCl<sub>3</sub></sup>-Cl slowly rearranges in DCM to the silylene-bridged complex 2<sup>SiCl<sub>2</sub></sup>-Cl (vide infra).*

### Independent synthesis of 4<sup>SiCl<sub>3</sub></sup>-HCl

3<sup>SiCl<sub>3</sub></sup>-Cl (20.0 mg, 24.0 μmol, 1.00 equiv.) was dissolved in benzene (0.7 mL) and a 2 M HCl solution in Et<sub>2</sub>O (37.4 mg, 100 μmol, 4.2 equiv.) was added. The reaction mixture was stirred at rt for 5 min, resulting in a yellow suspension. After slow evaporation of the solvent at rt, the yellow residue was washed with pentane (3 x 2 mL). Recrystallisation by diffusion of pentane into a saturated DCM solution at rt yielded 4<sup>SiCl<sub>3</sub></sup>-HCl as a pale-yellow crystalline solid (13.4 mg, 15.4 μmol, 59%). <sup>1</sup>H NMR (500.1 MHz, CD<sub>2</sub>Cl<sub>2</sub>, 298 K): δ = 3.20–2.66 (m, 4H, P<sub>2</sub>CH<sub>2</sub>), 1.93 (app. t<sub>+sat</sub>, <sup>2</sup>J<sub>H-P</sub> = 3.8 Hz, <sup>3</sup>J<sub>H-Pt</sub> = 26.2 Hz, 12H, PCH<sub>3</sub>), 1.73 (app. t<sub>+sat</sub>, <sup>2</sup>J<sub>H-P</sub> = 3.5 Hz, <sup>3</sup>J<sub>H-Pt</sub> = 33.5 Hz, 12H, PCH<sub>3</sub>), -15.8 (t<sub>+sat</sub>, <sup>2</sup>J<sub>H-P</sub> = 13.2 Hz, <sup>1</sup>J<sub>H-Pt</sub> = 1193 Hz, <sup>3</sup>J<sub>H-Pt</sub> = 22.8 Hz, 1H, PtH) ppm. <sup>13</sup>C{<sup>1</sup>H} NMR (125.8 MHz, CD<sub>2</sub>Cl<sub>2</sub>, 298 K): δ = 35.1 (tt, <sup>1</sup>J<sub>C-P</sub> = 17.7 Hz, <sup>3</sup>J<sub>C-P</sub> = 13.7 Hz, P<sub>2</sub>CH<sub>2</sub>), 17.5 (br s, PCH<sub>3</sub>), 14.8 (t, <sup>1</sup>J<sub>C-P</sub> = 18.6 Hz, PCH<sub>3</sub>) ppm. <sup>29</sup>Si{<sup>1</sup>H} NMR (99.4 MHz, CD<sub>2</sub>Cl<sub>2</sub>, 298 K): δ = -16.4 (t<sub>+sat</sub>, <sup>2</sup>J<sub>Si-P</sub> = 13.3 Hz, <sup>1</sup>J<sub>Si-Pt</sub> = 3138 Hz, PtSiCl<sub>3</sub>) ppm. <sup>31</sup>P{<sup>1</sup>H} NMR (202.5 MHz, CD<sub>2</sub>Cl<sub>2</sub>, 298 K): δ = -8.9 (m<sub>+sat</sub>, <sup>1</sup>J<sub>P-Pt</sub> = 2490 Hz, <sup>3</sup>J<sub>P-Pt</sub> = 73.5 Hz, 2P, P<sub>2</sub>PtH), -13.6 (m<sub>+sat</sub>, <sup>1</sup>J<sub>P-Pt</sub> = 2750 Hz, 2P, P<sub>2</sub>PtSiCl<sub>3</sub>) ppm. <sup>195</sup>Pt{<sup>1</sup>H} NMR (107.5 MHz, CD<sub>2</sub>Cl<sub>2</sub>, 298 K): δ = -4537 (t, <sup>1</sup>J<sub>P-Pt</sub> ≈ 2490 Hz, Pt, PtH), -4624 (t, <sup>1</sup>J<sub>P-Pt</sub> ≈ 2768 Hz, Pt, PtSiCl<sub>3</sub>) ppm. LIFDI-HRMS (DCM, *m/z*) calculated for C<sub>10</sub>H<sub>28</sub>Cl<sub>5</sub>P<sub>4</sub>Pt<sub>2</sub>Si = [4<sup>SiCl<sub>3</sub></sup>-HCl - H]<sup>+</sup>: 866.8603; found: 866.8602.

### Synthesis of $2^{\text{SiCl}_2}\text{-Cl}$

In a vial (5 mL), complex **6** (20.0 mg, 24.0  $\mu\text{mol}$ ) was dissolved in DCM (0.7 mL) and the mixture heated at 60 °C for 4 d. After evaporating the volatiles at ambient pressure, the residual solid was washed with pentane (3 x 2 mL) and benzene (2 x 2 mL). Recrystallisation from DCM/pentane afforded complex  $2^{\text{SiCl}_2}\text{-Cl}$  as a yellow solid (14.0 mg, 16.8  $\mu\text{mol}$ , 70%).  $^1\text{H}$  NMR (500.1 MHz,  $\text{CD}_2\text{Cl}_2$ , 298 K):  $\delta$  = 3.24–3.14 (m, 2H,  $\text{P}_2\text{CH}_2$ ), 1.91–1.85 (m, 2H,  $\text{P}_2\text{CH}_2$ ), 1.79 ( $t_{+\text{sat}}$ ,  $^2J_{\text{H-P}} = 3.7$  Hz,  $^3J_{\text{H-Pt}} = 26.4$  Hz, 12H,  $\text{PCH}_3$ ), 1.71 ( $t_{+\text{sat}}$ ,  $^2J_{\text{H-P}} = 3.2$  Hz,  $^3J_{\text{H-Pt}} = 28.5$  Hz, 12H,  $\text{PCH}_3$ ) ppm.  $^{13}\text{C}\{^1\text{H}\}$  NMR (125.8 MHz,  $\text{CD}_2\text{Cl}_2$ , 298 K):  $\delta$  = 27.2 ( $tt_{+\text{sat}}$ ,  $^1J_{\text{C-P}} = 16.5$  Hz,  $^2J_{\text{C-Pt}} = 99.8$  Hz,  $\text{P}_2\text{CH}_2$ ), 16.2 (br m,  $\text{PCH}_3$ ), 14.6 (br m,  $\text{PCH}_3$ ) ppm.  $^{29}\text{Si}\{^1\text{H}\}$  NMR (99.4 MHz,  $\text{CD}_2\text{Cl}_2$ , 298 K):  $\delta$  = 22.5 ( $t_{+\text{sat}}$ ,  $^2J_{\text{Si-P}} = 10.2$  Hz,  $^1J_{\text{Si-Pt}} = 1559$  Hz,  $\text{SiCl}_2$ ) ppm.  $^{31}\text{P}\{^1\text{H}\}$  NMR (202.5 MHz,  $\text{CD}_2\text{Cl}_2$ , 298 K):  $\delta$  = 1.2 ( $s_{+\text{sat}}$ ,  $^1J_{\text{P-Pt}} = 3098$  Hz,  $^3J_{\text{P-Pt}} = 242$  Hz,  $^2J_{\text{P-Pt}} = 283$  Hz) ppm.  $^{195}\text{Pt}\{^1\text{H}\}$  NMR (107.5 MHz,  $\text{CD}_2\text{Cl}_2$ , 298 K):  $\delta$  = -4446 ( $tt$ ,  $^1J_{\text{Pt-P}} = 3098$  Hz,  $^3J_{\text{Pt-P}} = 242$  Hz) ppm. Elemental analysis (%) calculated for  $[\text{C}_{10}\text{H}_{28}\text{Cl}_4\text{P}_4\text{Pt}_2\text{Si}(\text{C}_6\text{H}_6)_{0.1}]$  ( $M_w = 840.1$ ): C 15.15, H 3.43, found: C 15.22, H 3.45.

### Synthesis of $5^{\text{SiCl}_3}\text{-Br}$ and $5^{\text{SiCl}_3}\text{-Cl}$

In a vial (5 mL), complex  $3^{\text{SiCl}_3}\text{-Cl}$  (20.0 mg, 24.0  $\mu\text{mol}$ ) was dissolved in DBM (0.7 mL) and the solution heated at 60 °C for 7 d. After evaporating the volatiles at ambient pressure, the resulting residue was washed with pentane (3 x 2 mL) and benzene (2 x 2 mL). Recrystallisation of the residue from DCM/pentane yielded an inseparable 80:20 mixture of complexes  $5^{\text{SiCl}_3}\text{-Br}$  and  $5^{\text{SiCl}_3}\text{-Cl}$  as a yellow solid (15.3 mg, 14.6  $\mu\text{mol}$ , 61% combined yield).  $5^{\text{SiCl}_3}\text{-Br}$  (80%):  $^1\text{H}$  NMR (500.1 MHz,  $\text{C}_6\text{D}_6$ , 298 K):  $\delta$  = 3.53–3.41 (m, 2H,  $\text{P}_2\text{CH}_2$ ), 1.74 ( $t_{+\text{sat}}$ ,  $^2J_{\text{H-P}} = 8.5$  Hz, 2H,  $\text{PtCH}_2$ ), 1.60 ( $t_{+\text{sat}}$ ,  $^2J_{\text{H-P}} = 3.3$  Hz,  $^3J_{\text{H-Pt}} = 25.4$  Hz, 6H,  $\text{PCH}_3$ ), 1.39 ( $t_{+\text{sat}}$ ,  $^2J_{\text{H-P}} = 3.5$  Hz,  $^3J_{\text{H-Pt}} = 21.0$  Hz, 6H,  $\text{PCH}_3$ ), 1.24 ( $t_{+\text{sat}}$ ,  $^2J_{\text{H-P}} = 3.7$  Hz,  $^3J_{\text{H-Pt}} = 20.2$  Hz, 6H,  $\text{PCH}_3$ ), 1.21–1.15 (m, 2H,  $\text{P}_2\text{CH}_2$ ), 1.10 ( $t_{+\text{sat}}$ ,  $^2J_{\text{H-P}} = 3.2$  Hz,  $^3J_{\text{H-Pt}} = 25.4$  Hz, 6H,  $\text{PCH}_3$ ) ppm.  $^{13}\text{C}\{^1\text{H}\}$  NMR (125.8 MHz,  $\text{C}_6\text{D}_6$ , 298 K):  $\delta$  = 34.5 ( $t_{+\text{sat}}$ ,  $^1J_{\text{C-P}} = 14.5$  Hz,  $\text{P}_2\text{CH}_2$ ), 15.0 (app.  $tt$ ,  $^1J_{\text{C-P}} = 18.8$  Hz,  $^3J_{\text{C-P}} = 4.5$  Hz,  $\text{PCH}_3$ ), 14.2 (app.  $tt$ ,  $^1J_{\text{C-P}} = 19.7$  Hz,  $^3J_{\text{C-P}} = 4.2$  Hz,  $\text{PCH}_3$ ), 12.9 (app.  $t$ ,  $^1J_{\text{C-P}} = 18.7$  Hz,  $\text{PCH}_3$ ), 10.2 (app.  $t$ ,  $^1J_{\text{C-P}} = 17.0$  Hz,  $\text{PCH}_3$ ), -2.9 ( $t$ ,  $^2J_{\text{C-P}} = 5.6$  Hz,  $\text{PtCH}_2$ ) ppm.  $^{29}\text{Si}\{^1\text{H}\}$  NMR (99.4 MHz,  $\text{C}_6\text{D}_6$ , 298 K):  $\delta$  = 2.5 ( $s$ ,  $\text{SiCl}_3$ ) ppm.  $^{31}\text{P}\{^1\text{H}\}$  NMR (202.5 MHz,  $\text{C}_6\text{D}_6$ , 298 K):  $\delta$  = -15.0 ( $t_{+\text{sat}}$ ,  $^2J_{\text{P-P}} = 11.8$  Hz,  $^1J_{\text{P-Pt}} = 2702$  Hz, 2P,  $\text{P}_2\text{Pt}(\text{Br})\text{SiCl}_3$ ), -20.7 ( $t_{+\text{sat}}$ ,  $^2J_{\text{P-P}} = 11.8$  Hz,  $^1J_{\text{P-Pt}} = 2420$  Hz, 2P,  $\text{P}_2\text{Pt}(\text{Br}_2)$ ) ppm.  $^{195}\text{Pt}\{^1\text{H}\}$  NMR (107.5 MHz,  $\text{C}_6\text{D}_6$ , 298 K):  $\delta$  = -4408 ( $t$ ,  $^1J_{\text{Pt-P}} = 2420$  Hz,  $\text{Pt}$ ,  $\text{P}_2\text{Pt}(\text{Br}_2)$ ), -4421 ( $t$ ,  $^1J_{\text{Pt-P}} = 2702$  Hz,  $\text{Pt}$ ,  $\text{P}_2\text{Pt}(\text{Br})\text{SiCl}_3$ ), ppm.  $5^{\text{SiCl}_3}\text{-Cl}$  (20%):  $^1\text{H}$  NMR (500.1 MHz,  $\text{C}_6\text{D}_6$ , 298 K):  $\delta$  = 2.35 ( $t_{+\text{sat}}$ ,  $^2J_{\text{H-P}} = 8.5$  Hz, 2H,  $\text{PtCH}_2$ ), 1.70 ( $t$ ,  $^2J_{\text{H-P}} = 3.4$  Hz, 6H,  $\text{PCH}_3$ ), 1.62 (m, 6H,

$\text{PCH}_3$ ), 1.53 (t,  $^2J_{\text{H-P}} = 3.1$  Hz, 6H,  $\text{PCH}_3$ ), 1.45 (m, 6H,  $\text{PCH}_3$ ) ppm. *Note: The resonance for the  $\text{P}_2\text{CH}_2$  group was not detected.*  $^{13}\text{C}\{^1\text{H}\}$  NMR (125.8 MHz,  $\text{C}_6\text{D}_6$ , 298 K):  $\delta = 14.8$  (m,  $\text{PCH}_3$ ), 14.7 (m,  $\text{PCH}_3$ ), 13.2 (m,  $\text{PCH}_3$ ), 12.1 (m,  $\text{PCH}_3$ ),  $-1.2$  (m,  $\text{PtCH}_2$ ) ppm. *Note: The  $\text{P}_2\text{CH}_2$  resonance was not detected.*  $^{29}\text{Si}\{^1\text{H}\}$  NMR (99.4 MHz,  $\text{C}_6\text{D}_6$ , 298 K):  $\delta = 2.5$  (s,  $\text{SiCl}_3$ ) ppm.  $^{31}\text{P}\{^1\text{H}\}$  NMR (202.5 MHz,  $\text{C}_6\text{D}_6$ , 298 K):  $\delta = -9.6$  ( $t_{\text{+sat}}$ ,  $^2J_{\text{P-P}} = 15.2$  Hz,  $^1J_{\text{Pt-P}} = 2720$  Hz, 2P,  $\text{P}_2\text{Pt}(\text{Cl})\text{CH}_2\text{SiCl}_3$ ),  $-16.7$  ( $t_{\text{+sat}}$ ,  $^2J_{\text{P-P}} = 15.2$  Hz, 2P,  $\text{P}_2\text{PtCl}_2$ ) ppm.  $^{195}\text{Pt}\{^1\text{H}\}$  NMR (107.5 MHz,  $\text{C}_6\text{D}_6$ , 298 K):  $\delta = -4367$  (t,  $^1J_{\text{Pt-P}} \approx 2420$  Hz, Pt,  $\text{P}_2\text{PtCl}_2$ ),  $-4411$  (t,  $^1J_{\text{Pt-P}} \approx 2770$  Hz, Pt,  $\text{P}_2\text{Pt}(\text{Cl})\text{SiCl}_3$ ) ppm. *Note: the  $^{195}\text{Pt}$  NMR resonances and  $^1J_{\text{Pt-P}}$  coupling constants of  $5^{\text{SiCl}_3}\text{-Cl}$  were identified by  $^1\text{H}$ - $^{195}\text{Pt}$  HMBC.* LIFDI-HRMS (DCM,  $m/z$ ) calculated for  $\text{C}_{11}\text{H}_{30}\text{Br}_2\text{Cl}_3\text{P}_4\text{Pt}_2\text{Si} = [5^{\text{SiCl}_3}\text{-Br} - \text{Br}]^+$ : 970.7739; found: 970.7723; for  $\text{C}_{11}\text{H}_{30}\text{BrCl}_4\text{P}_4\text{Pt}_2\text{Si} = [5^{\text{SiCl}_3}\text{-Cl} - \text{Cl}]^+$ : 924.8253; found: 924.8246.

## NMR spectra of new compounds

### General remarks

As the complexes decomposed when exposed to a vacuum, they had to be dried at ambient pressure. As a result, most NMR spectra exhibit resonances of residual crystallisation solvents, including benzene, *o*-DFB, pentane, DCM or hexanes, marked with \*. The ubiquitous decomposition products  $[(\mu\text{-dmpm})_2\text{Pt}_2\text{X}_2]$  are marked with  $\blacklozenge$ . Other, unidentified byproducts are marked with ?

### Analysis of $^{29}\text{Si}\{^1\text{H}\}$ NMR spectra

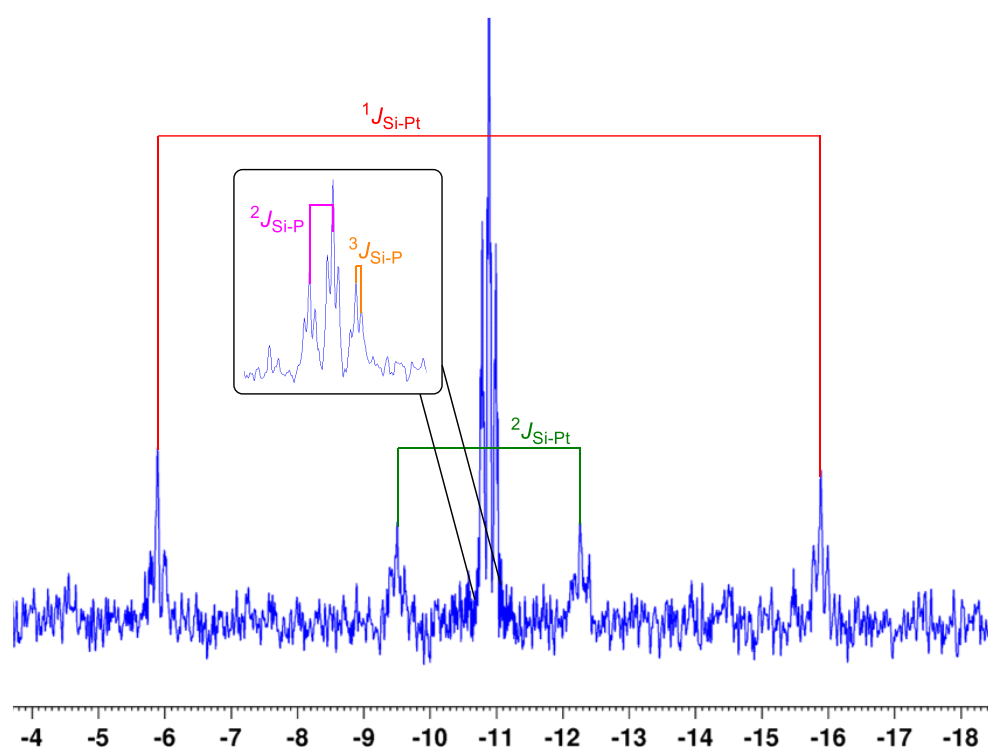

**Figure S1.** Typical  $^{29}\text{Si}\{^1\text{H}\}$  spectrum of an unsymmetrical  $[(\mu\text{-dmpm})_2\{\text{PtX}\}\{\text{PtSiR}_3\}]$  complex, showing the main couplings.

## Analysis of $^{31}\text{P}\{^1\text{H}\}$ NMR spectra<sup>4</sup>

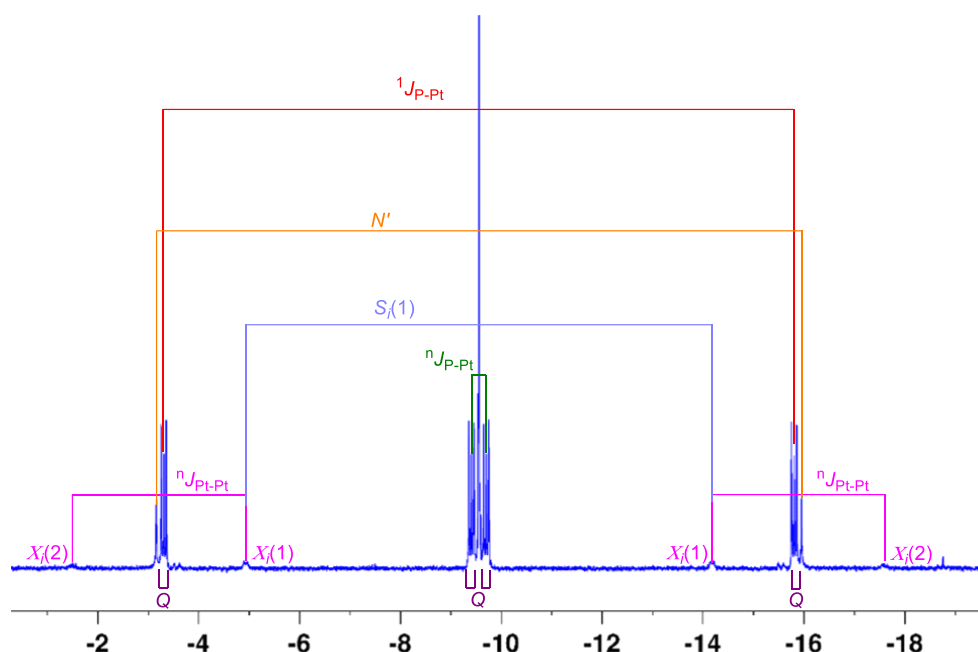

**Figure S2.** Typical  $^{31}\text{P}\{^1\text{H}\}$  spectrum of a symmetrical A-frame complex, showing the main couplings.  $N' = {}^1J_{\text{P-Pt}} + {}^nJ_{\text{P-Pt}}$ .  $Q = \Sigma({}^nJ_{\text{P-Pt}})$  (note:  ${}^nJ_{\text{P-Pt}}$  may be negative). Second way of calculating  ${}^nJ_{\text{P-Pt}}$ , when the  $X_i(2)$  lines are not visible:  ${}^nJ_{\text{P-Pt}} = (L^2 - S_i(1)^2)/(2S_i(1))$ , where  $L' = {}^1J_{\text{P-Pt}} - {}^nJ_{\text{P-Pt}}$ .

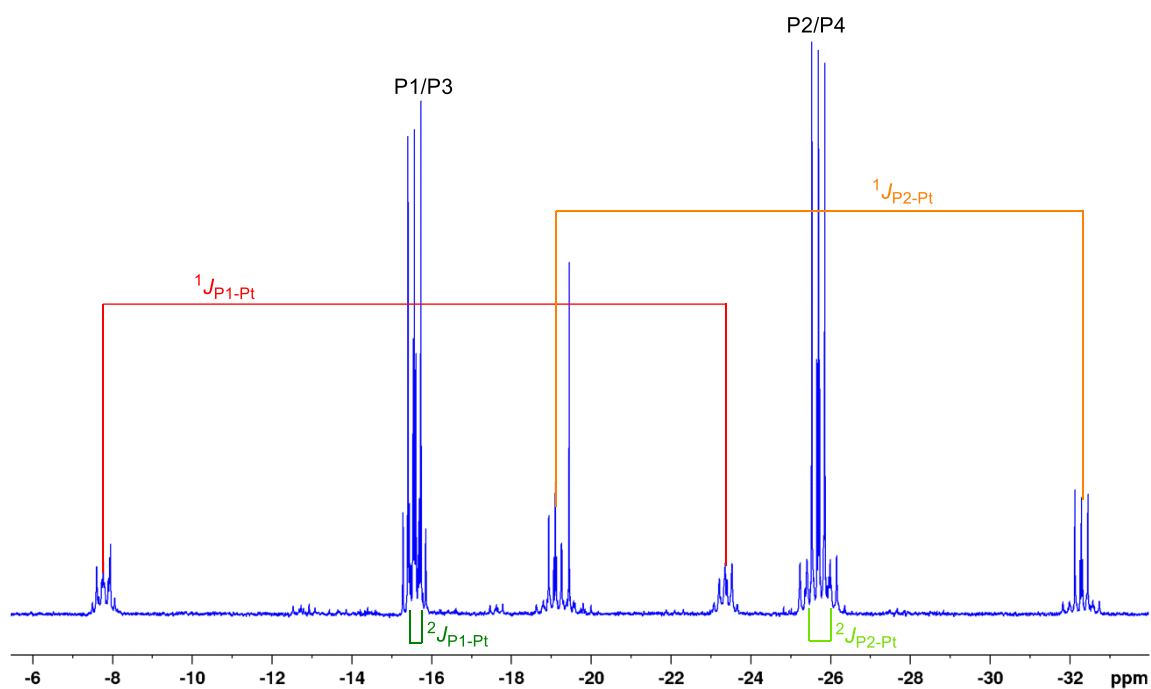

**Figure S3.** Typical  $^{31}\text{P}\{^1\text{H}\}$  spectrum of an unsymmetrical  $(\mu\text{-dmpm})_2\text{Pt}_2$  complex, showing the main couplings. Note: despite the close proximity of the two resonances, no higher-order coupling patterns are observed.

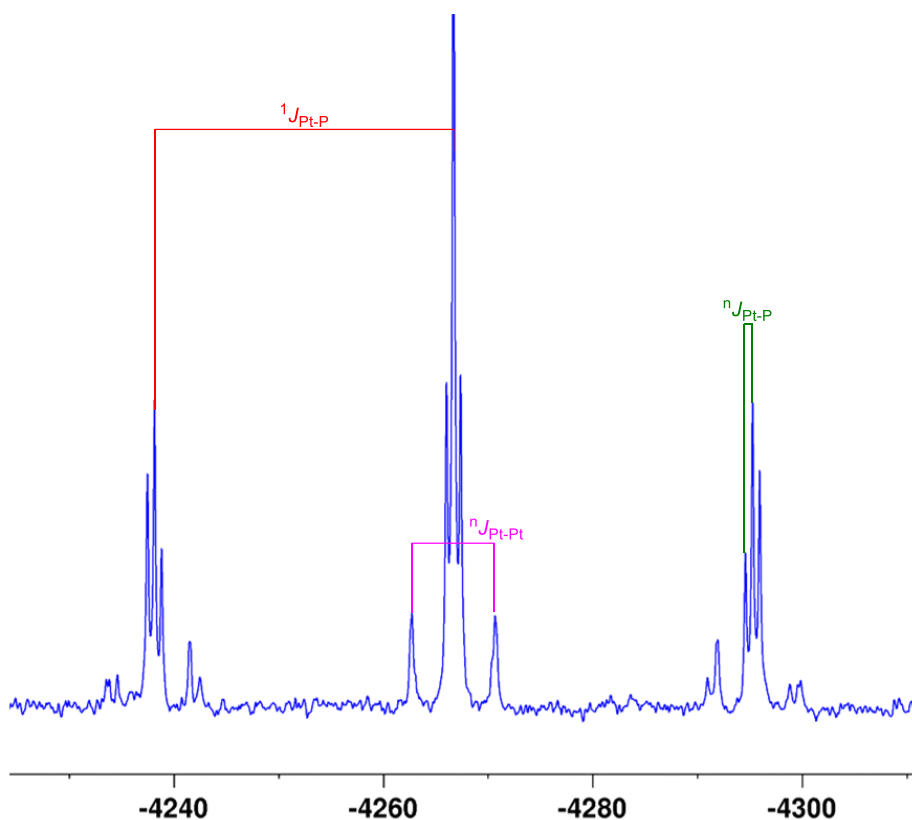

**Figure S4.** Typical  $^{195}\text{Pt}\{^1\text{H}\}$  spectrum of an A-frame complex, showing the main couplings.

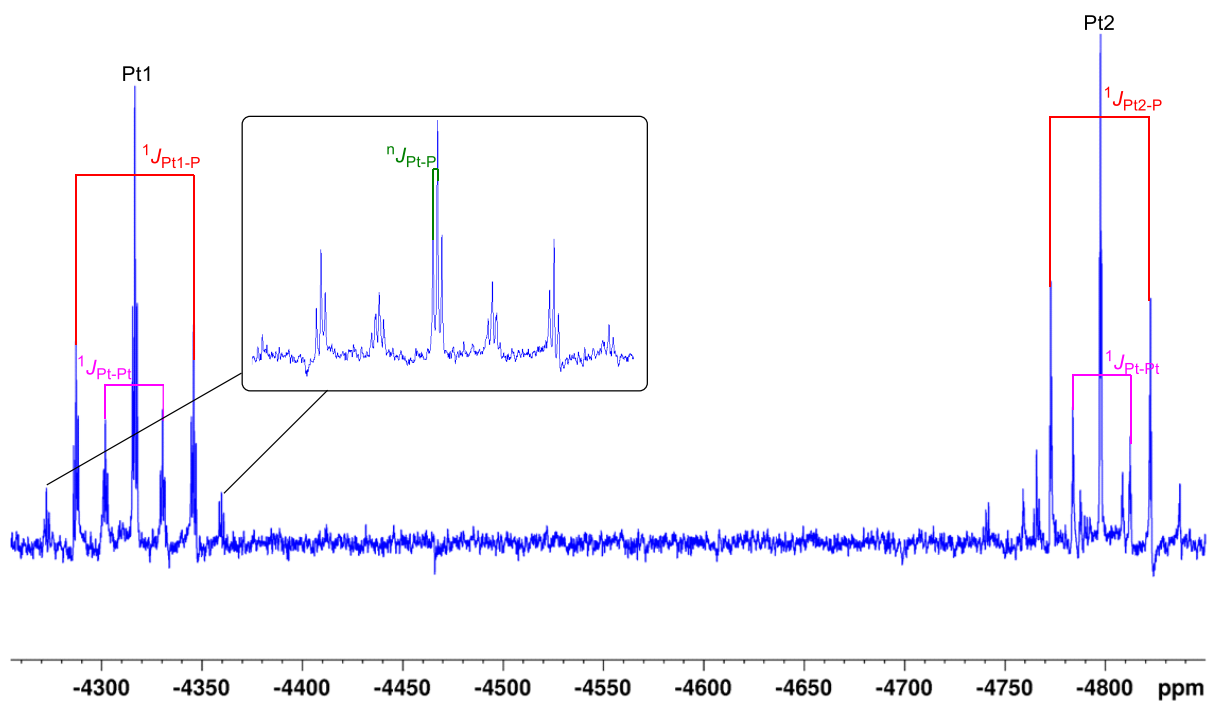

**Figure S5.** Typical  $^{195}\text{Pt}\{^1\text{H}\}$  spectrum of an unsymmetrical  $(\mu\text{-dmpm})_2\text{Pt}_2$  complex, showing the main couplings.

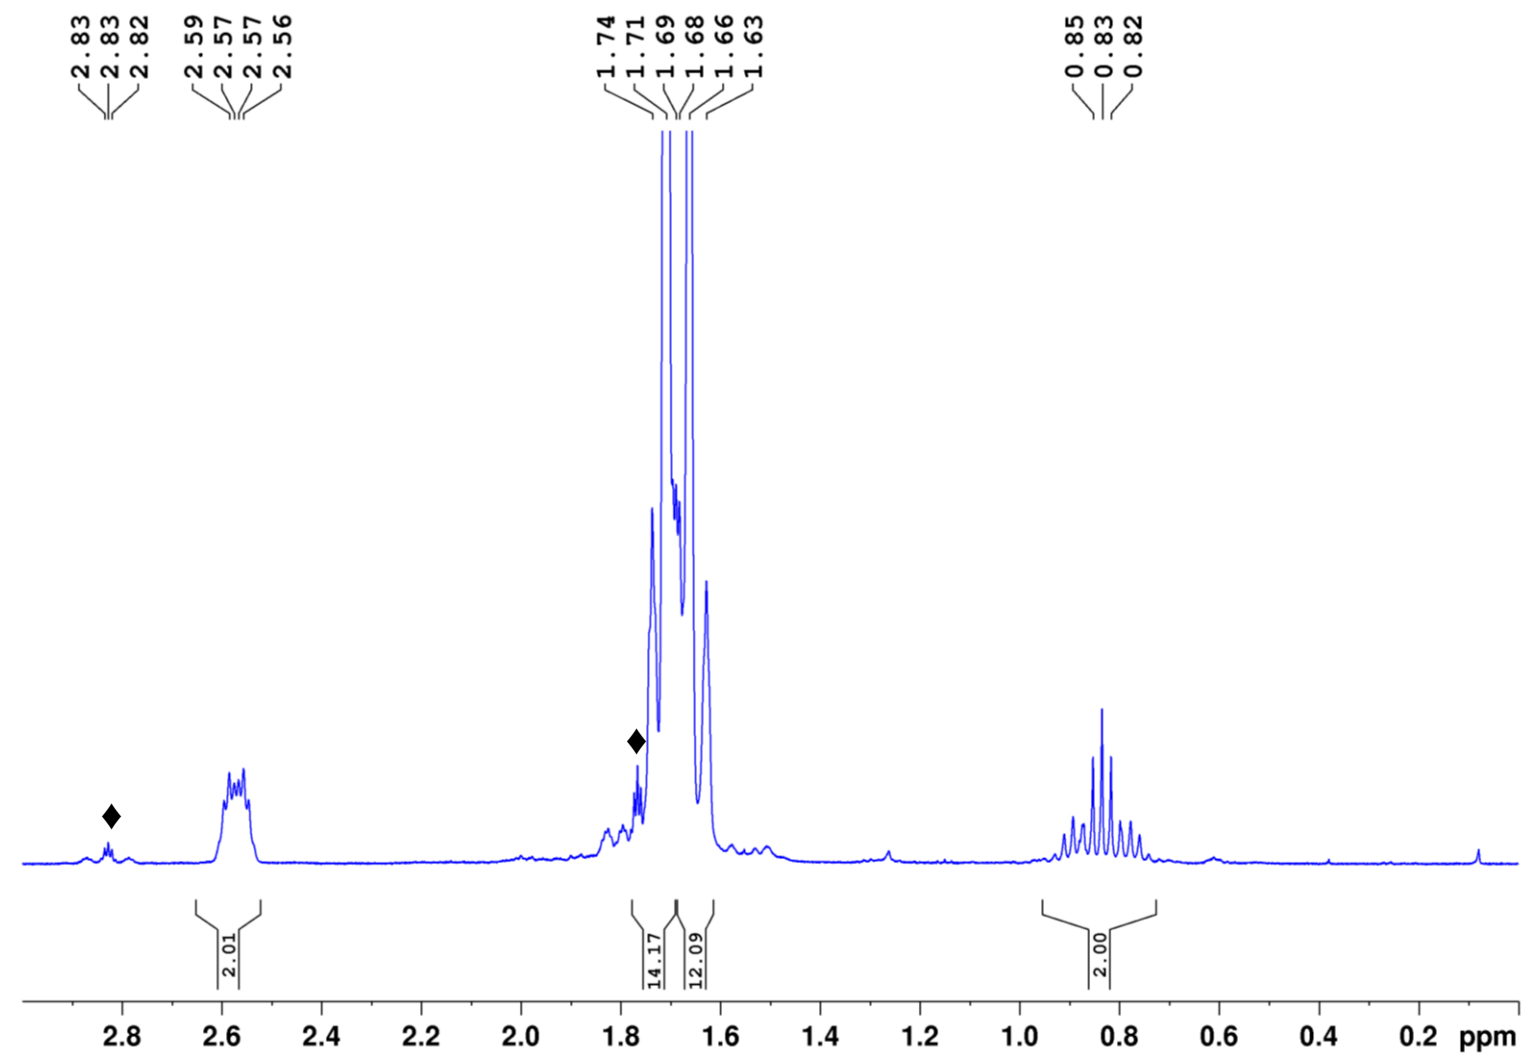

**Figure S6.**  $^1\text{H}$  NMR spectrum of  $2^{\text{CH}_2}\text{-Cl}$  in  $\text{CD}_2\text{Cl}_2$ . The additional resonances marked  $\blacklozenge$  correspond to the decomposition product  $[(\mu\text{-dmpm})_2\text{Pt}_2\text{Cl}_2]$ .

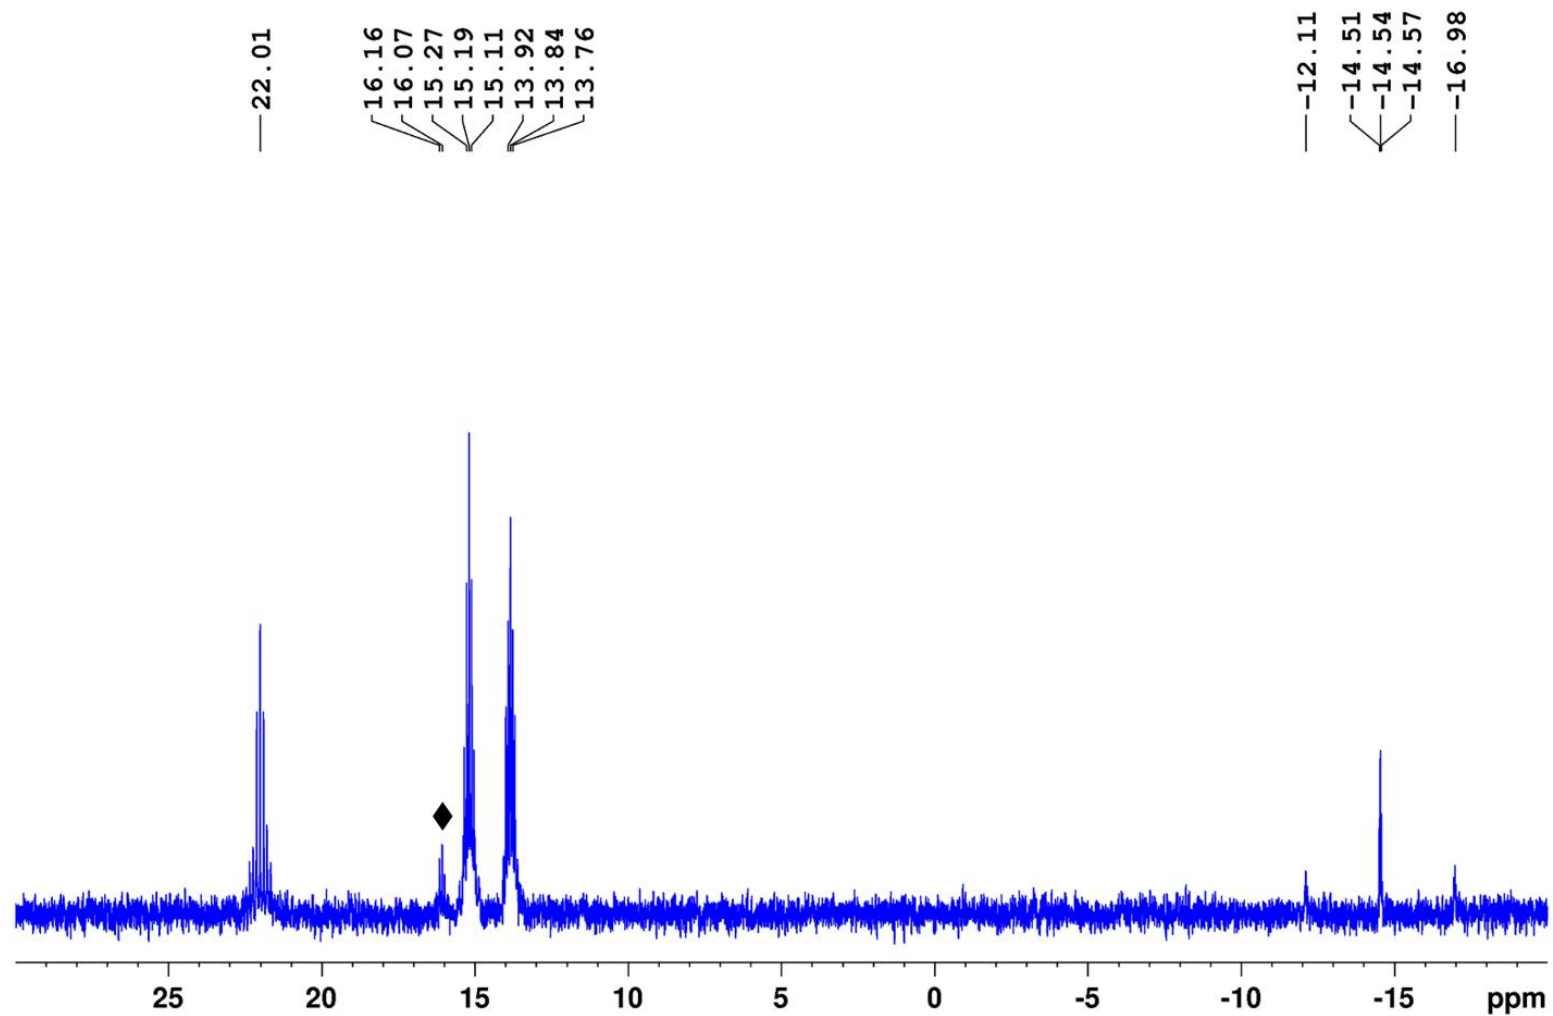

**Figure S7.**  $^{13}\text{C}\{^1\text{H}\}$  NMR spectrum of  $2^{\text{CH}_2}\text{-Cl}$  in  $\text{CD}_2\text{Cl}_2$ . The additional resonance marked  $\blacklozenge$  corresponds to the decomposition product  $[(\mu\text{-dmpm})_2\text{Pt}_2\text{Cl}_2]$ .

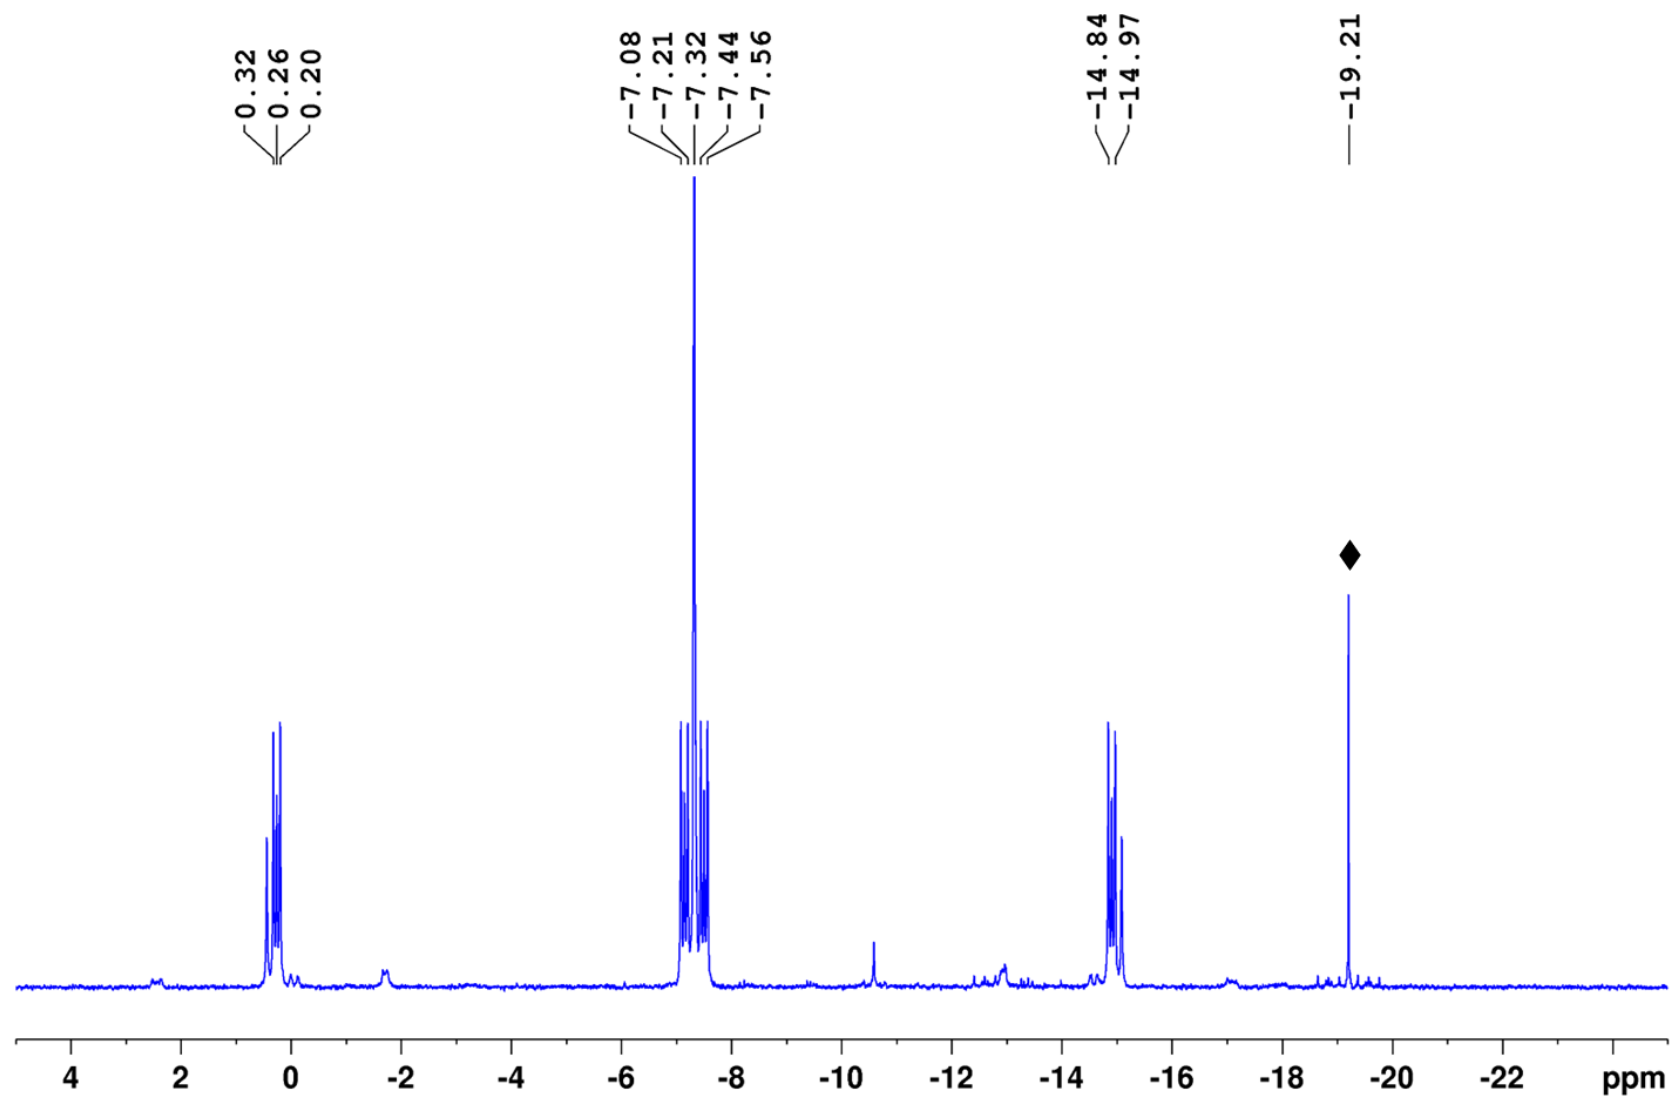

**Figure S8.**  $^{31}\text{P}\{^1\text{H}\}$  NMR spectrum of  $2^{\text{CH}_2}\text{-Cl}$  in  $\text{CD}_2\text{Cl}_2$ . The additional resonances marked  $\blacklozenge$  correspond to the decomposition product  $[(\mu\text{-dmpm})_2\text{Pt}_2\text{Cl}_2]$  (ca. 5%).

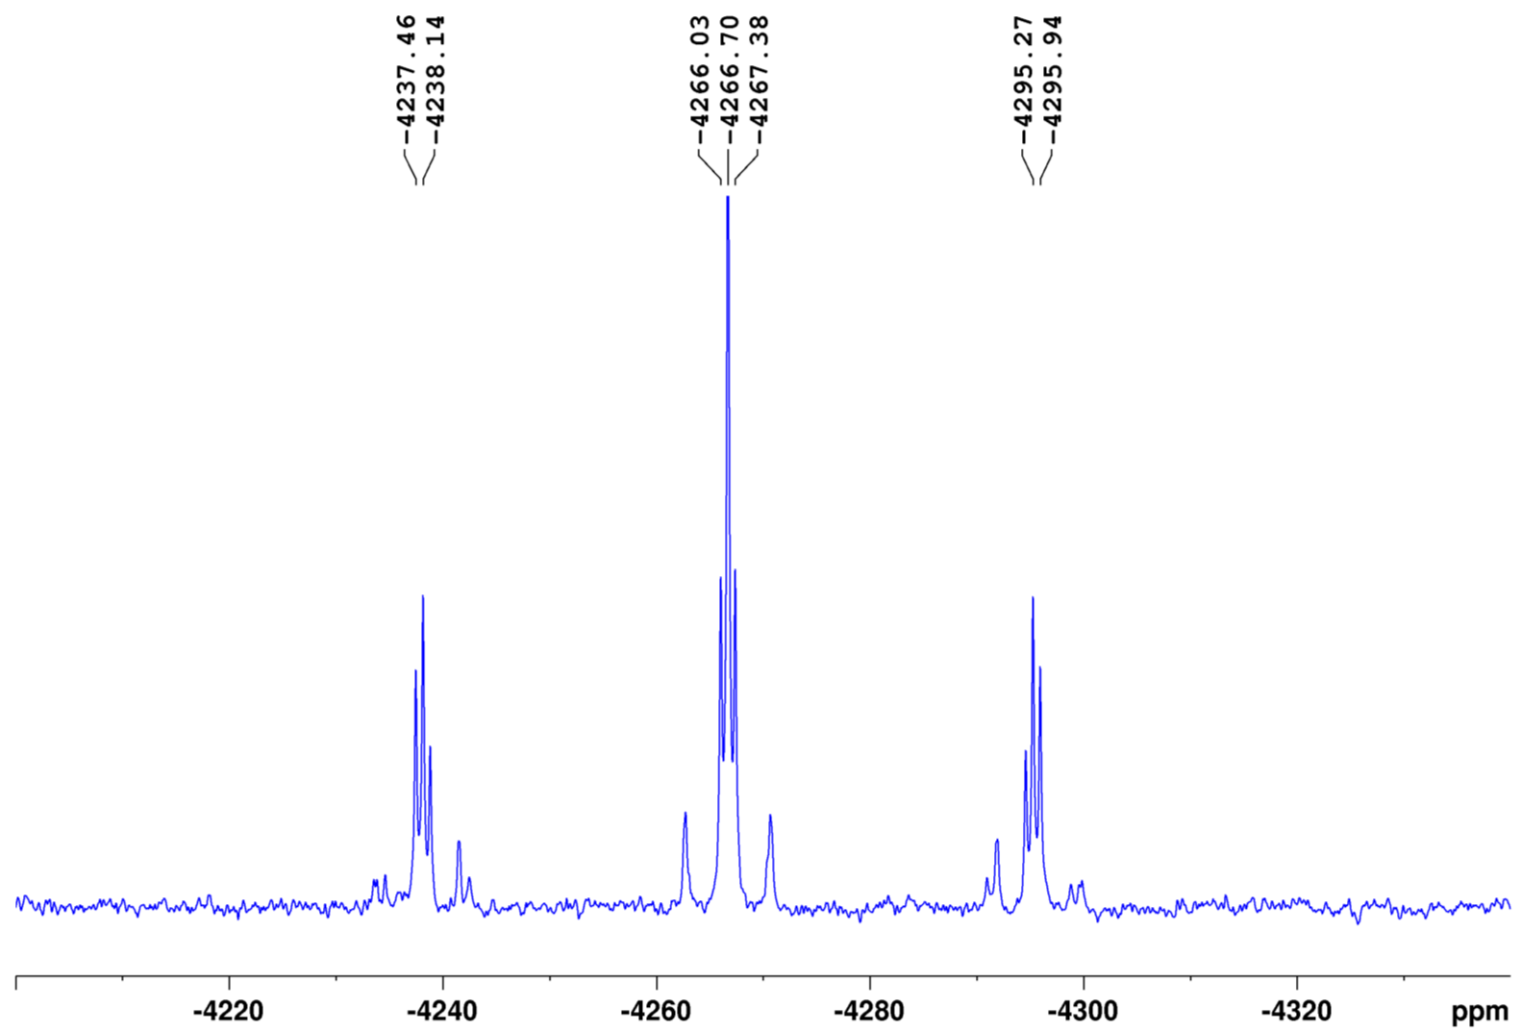

**Figure S9.**  $^{195}\text{Pt}\{^1\text{H}\}$  NMR spectrum of  $2^{\text{CH}_2}\text{-Cl}$  in  $\text{CD}_2\text{Cl}_2$ .

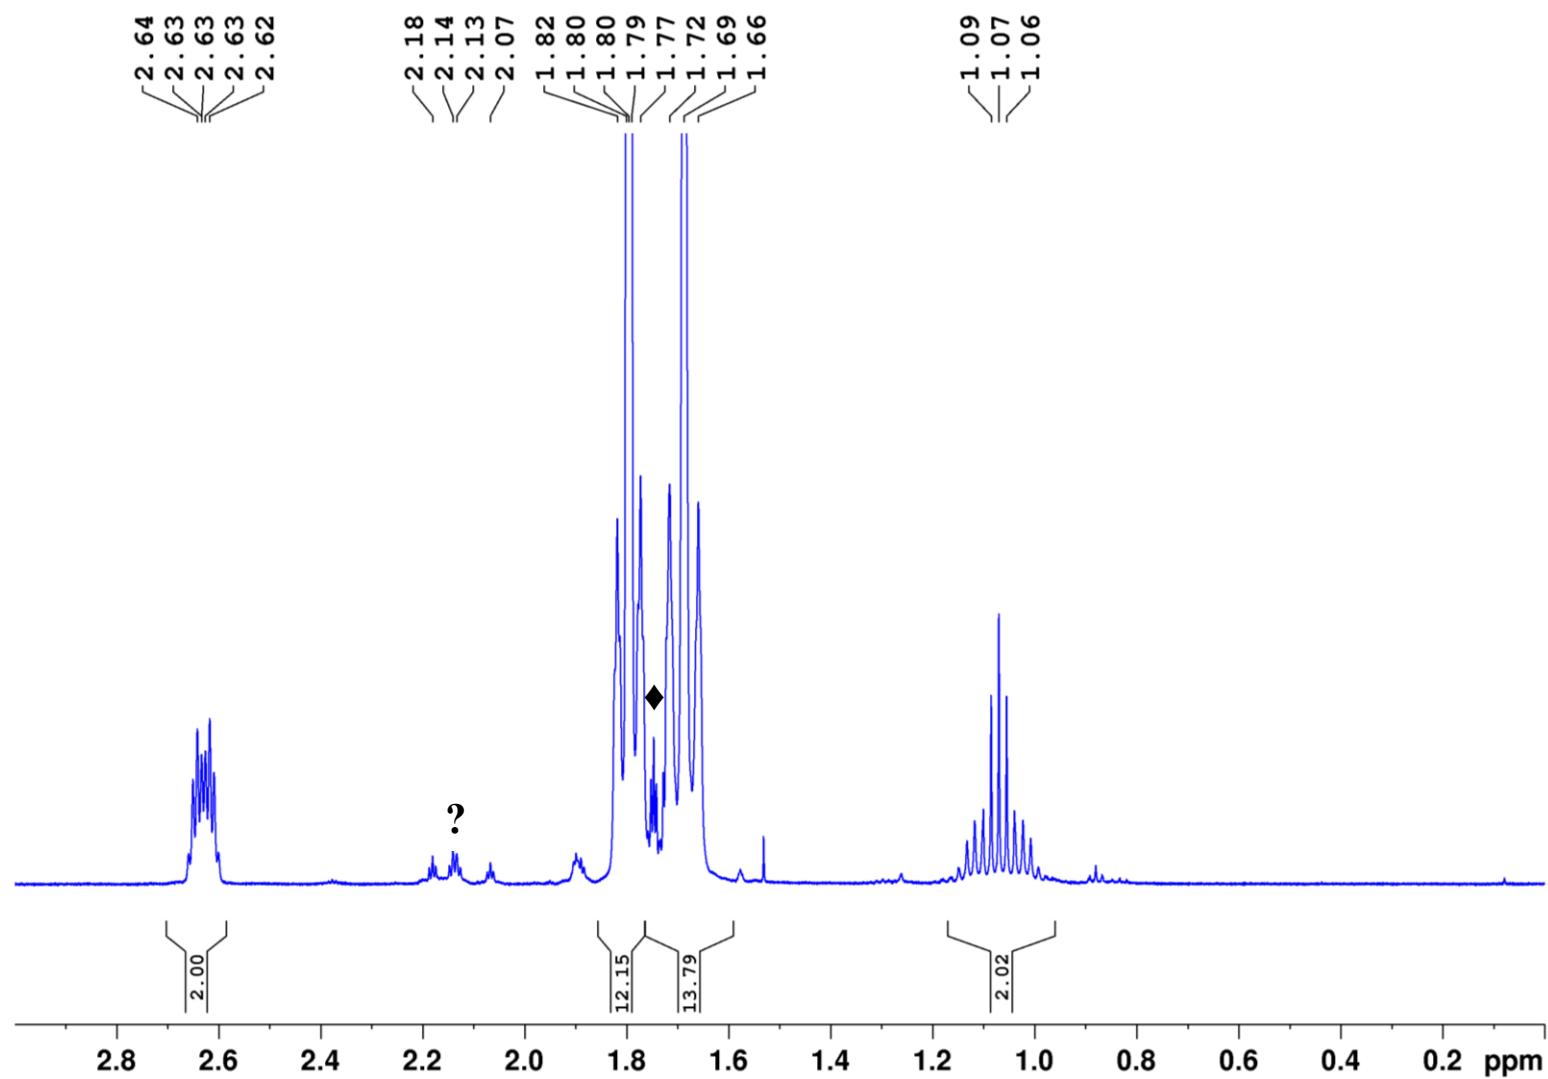

**Figure S10.**  $^1\text{H}$  NMR spectrum of  $2^{\text{CH}_2}\text{-Br}$  in  $\text{CD}_2\text{Cl}_2$ . The additional resonances marked  $\blacklozenge$  correspond to the decomposition product  $[(\mu\text{-dmpm})_2\text{Pt}_2\text{Cl}_2]$ , those marked  $?$  to an unknown byproduct.

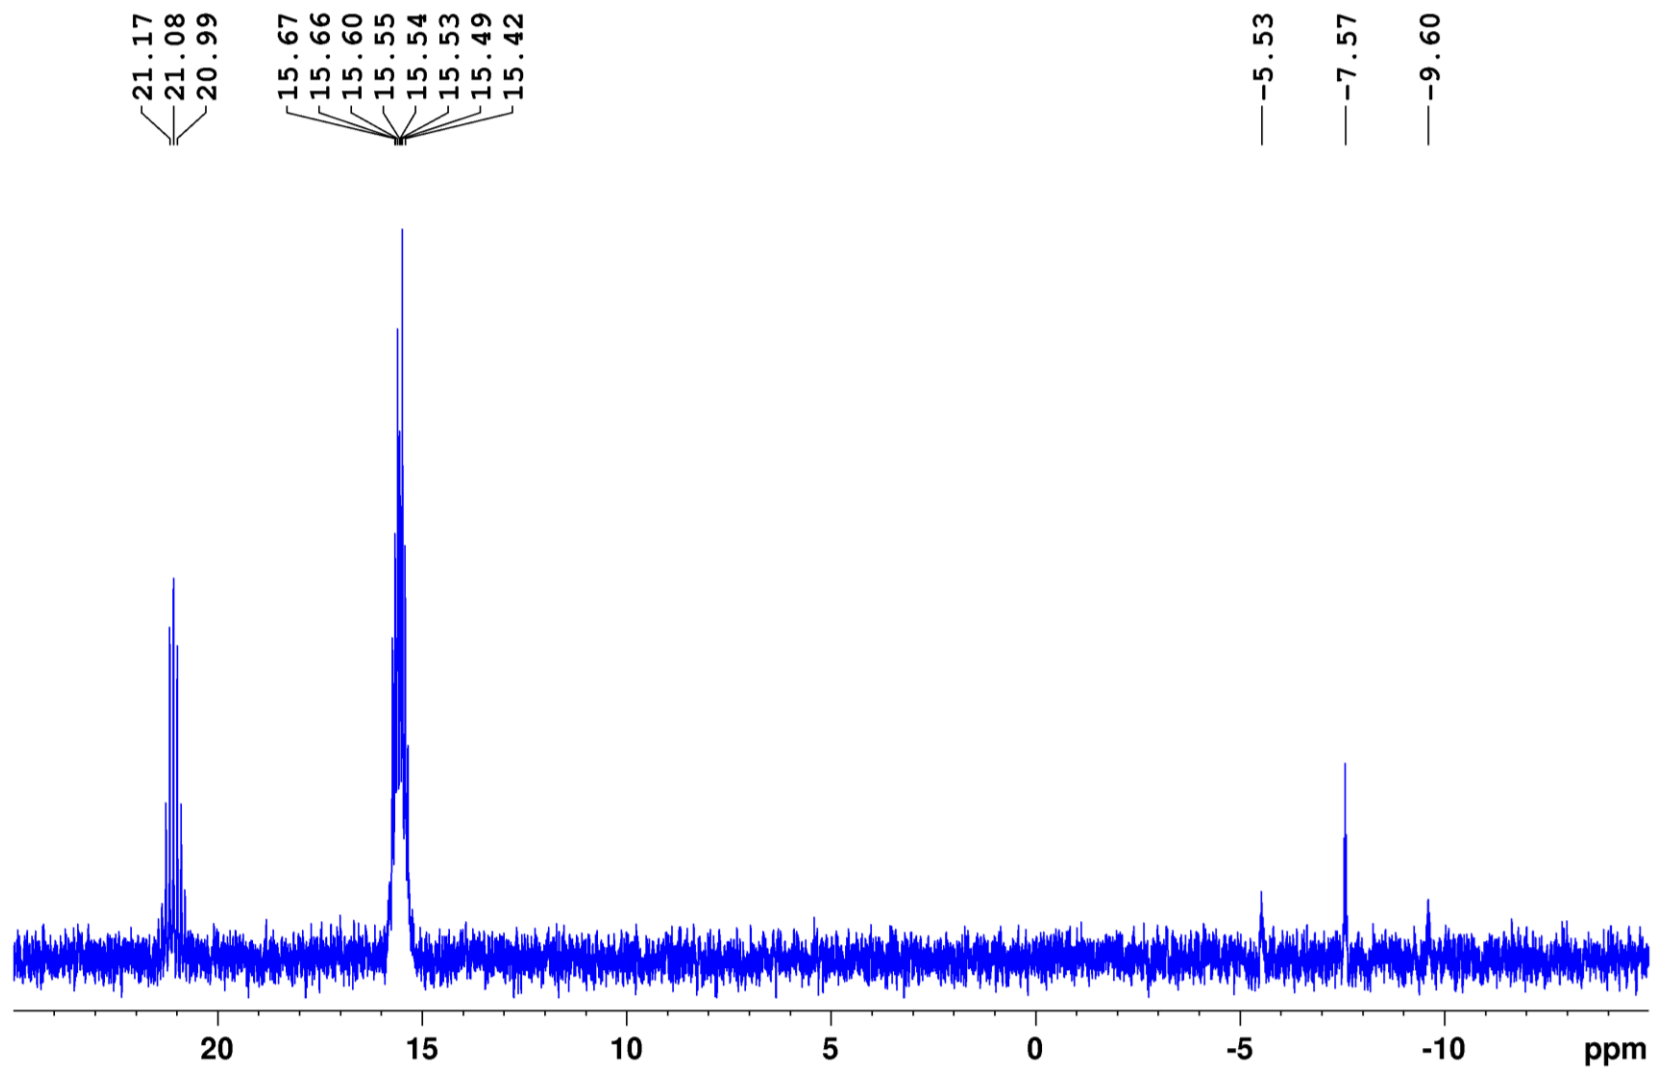

Figure S11.  $^{13}\text{C}\{^1\text{H}\}$  NMR spectrum of  $2^{\text{CH}_2}\text{-Br}$  in  $\text{CD}_2\text{Cl}_2$ .

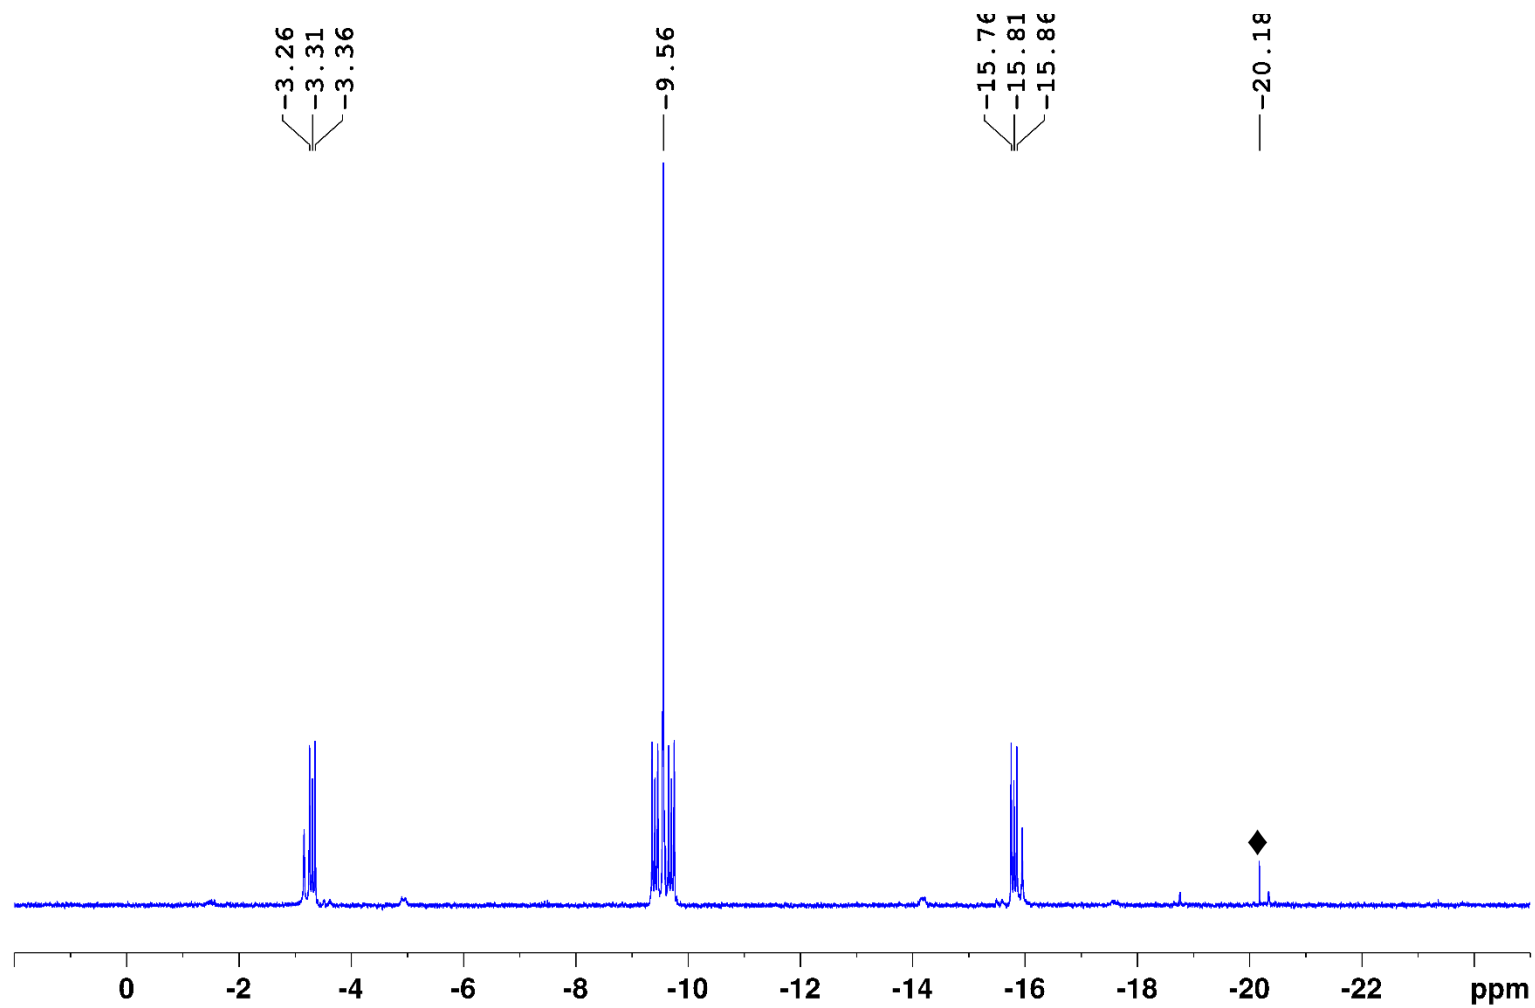

**Figure S12.**  $^{31}\text{P}\{^1\text{H}\}$  NMR spectrum of  $2^{\text{CH}_2}\text{-Br}$  in  $\text{CD}_2\text{Cl}_2$ . The additional resonances marked  $\blacklozenge$  correspond to the decomposition product  $[(\mu\text{-dmpm})_2\text{Pt}_2\text{Br}_2]$  (ca. 0.5%).

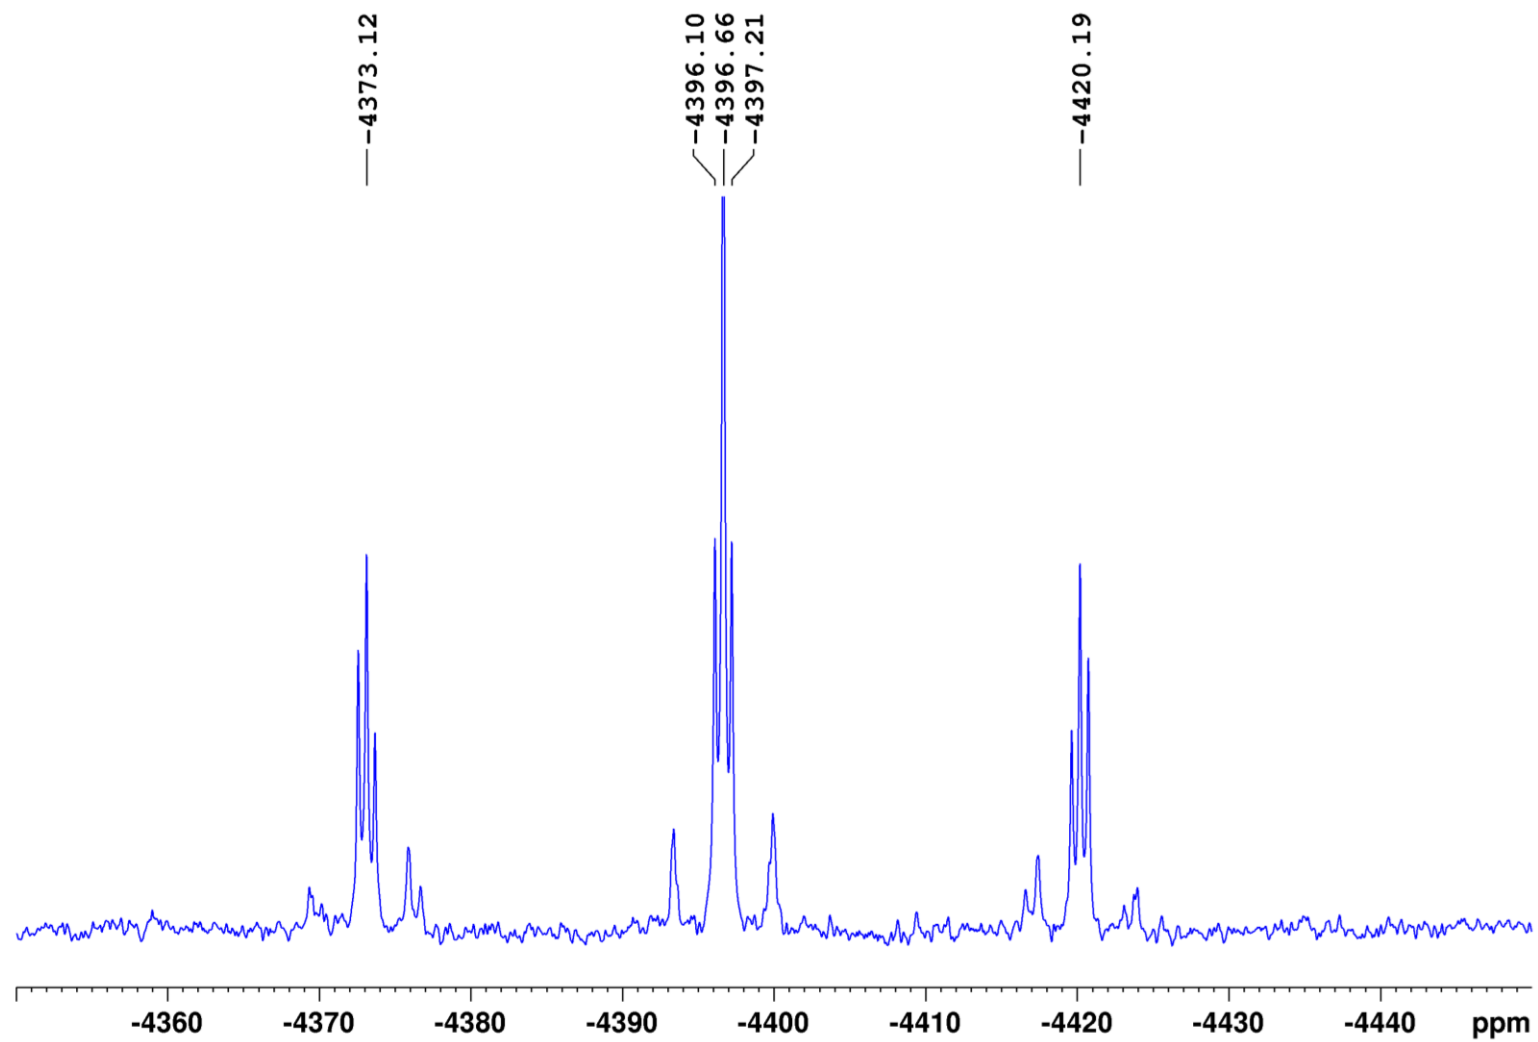

Figure S13.  $^{195}\text{Pt}\{^1\text{H}\}$  NMR spectrum of  $2^{\text{CH}_2}\text{-Br}$  in  $\text{CD}_2\text{Cl}_2$ .

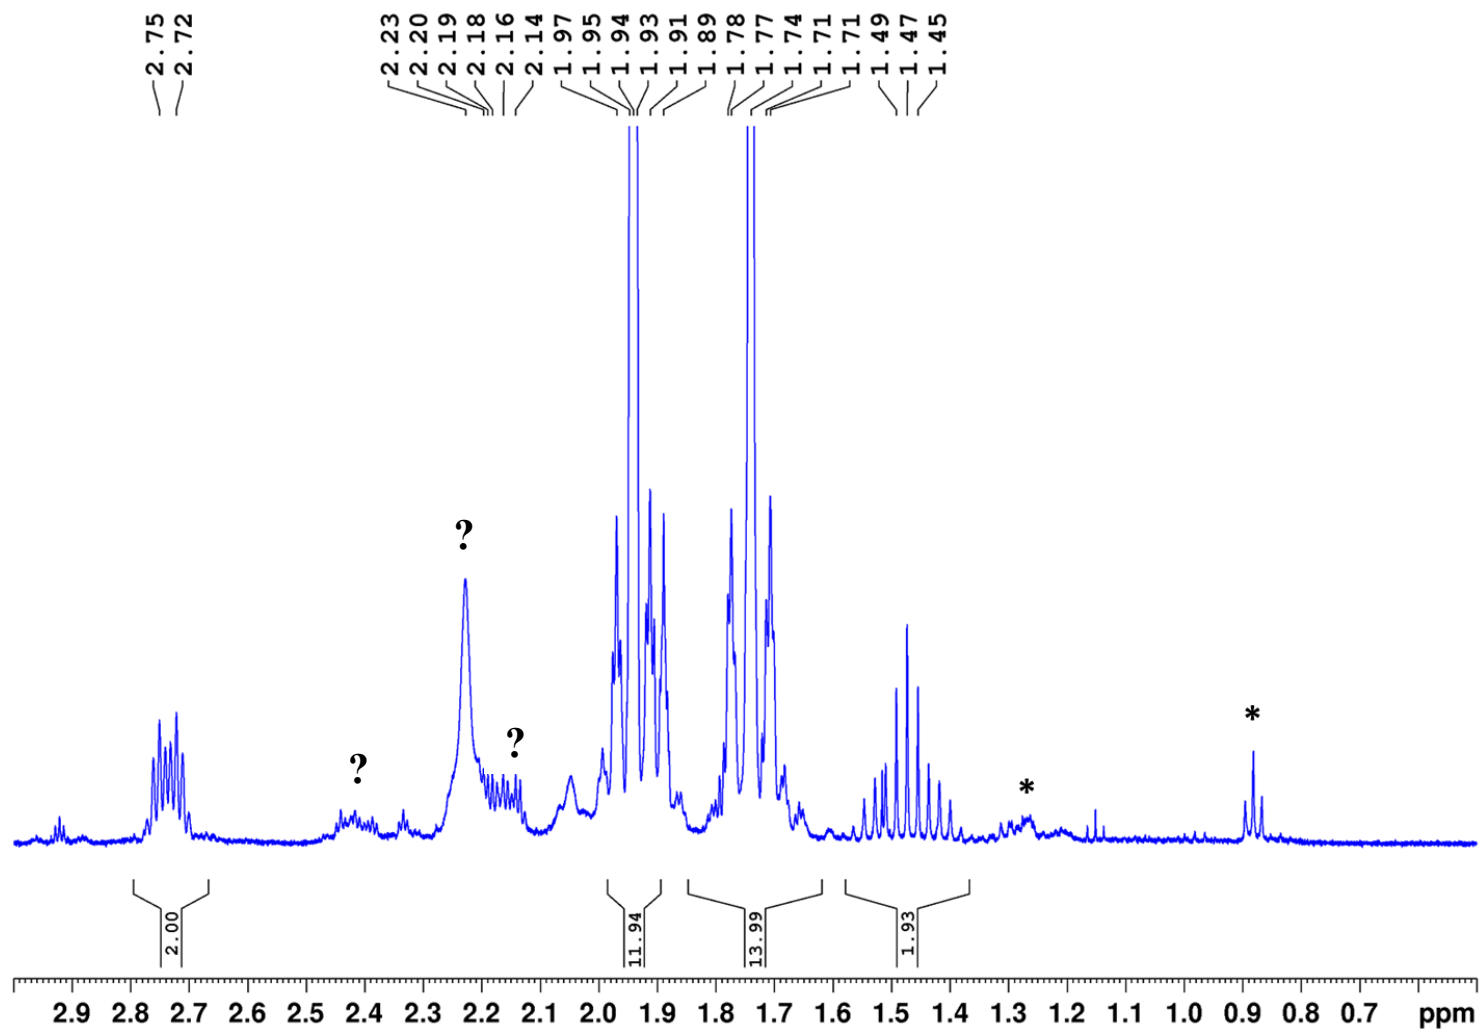

**Figure S14.**  $^1\text{H}$  NMR spectrum of  $2^{\text{CH}_2\text{-I}}$  in  $\text{CD}_2\text{Cl}_2$ . The additional resonances marked ? correspond to an unknown Pt complex, those marked \* to residual pentane.

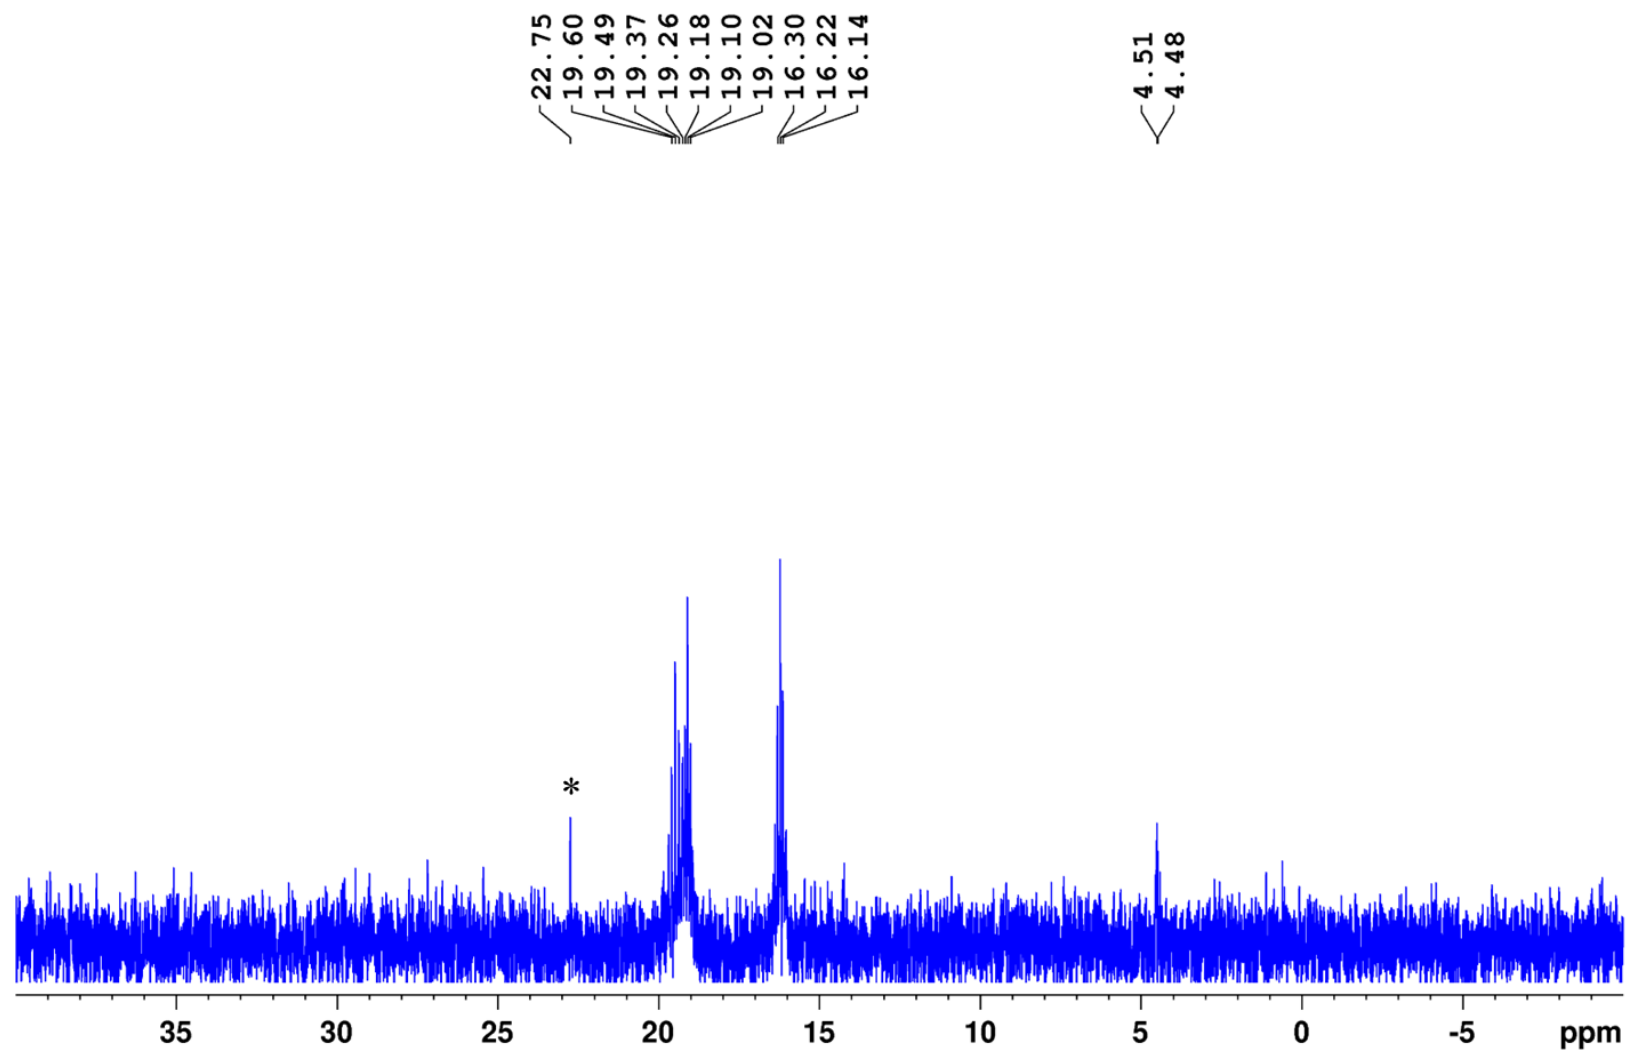

**Figure S15.**  $^{13}\text{C}\{^1\text{H}\}$  NMR spectrum of  $2^{\text{CH}_2}\text{-I}$  in  $\text{CD}_2\text{Cl}_2$ . The additional resonance marked \* corresponds to residual pentane.

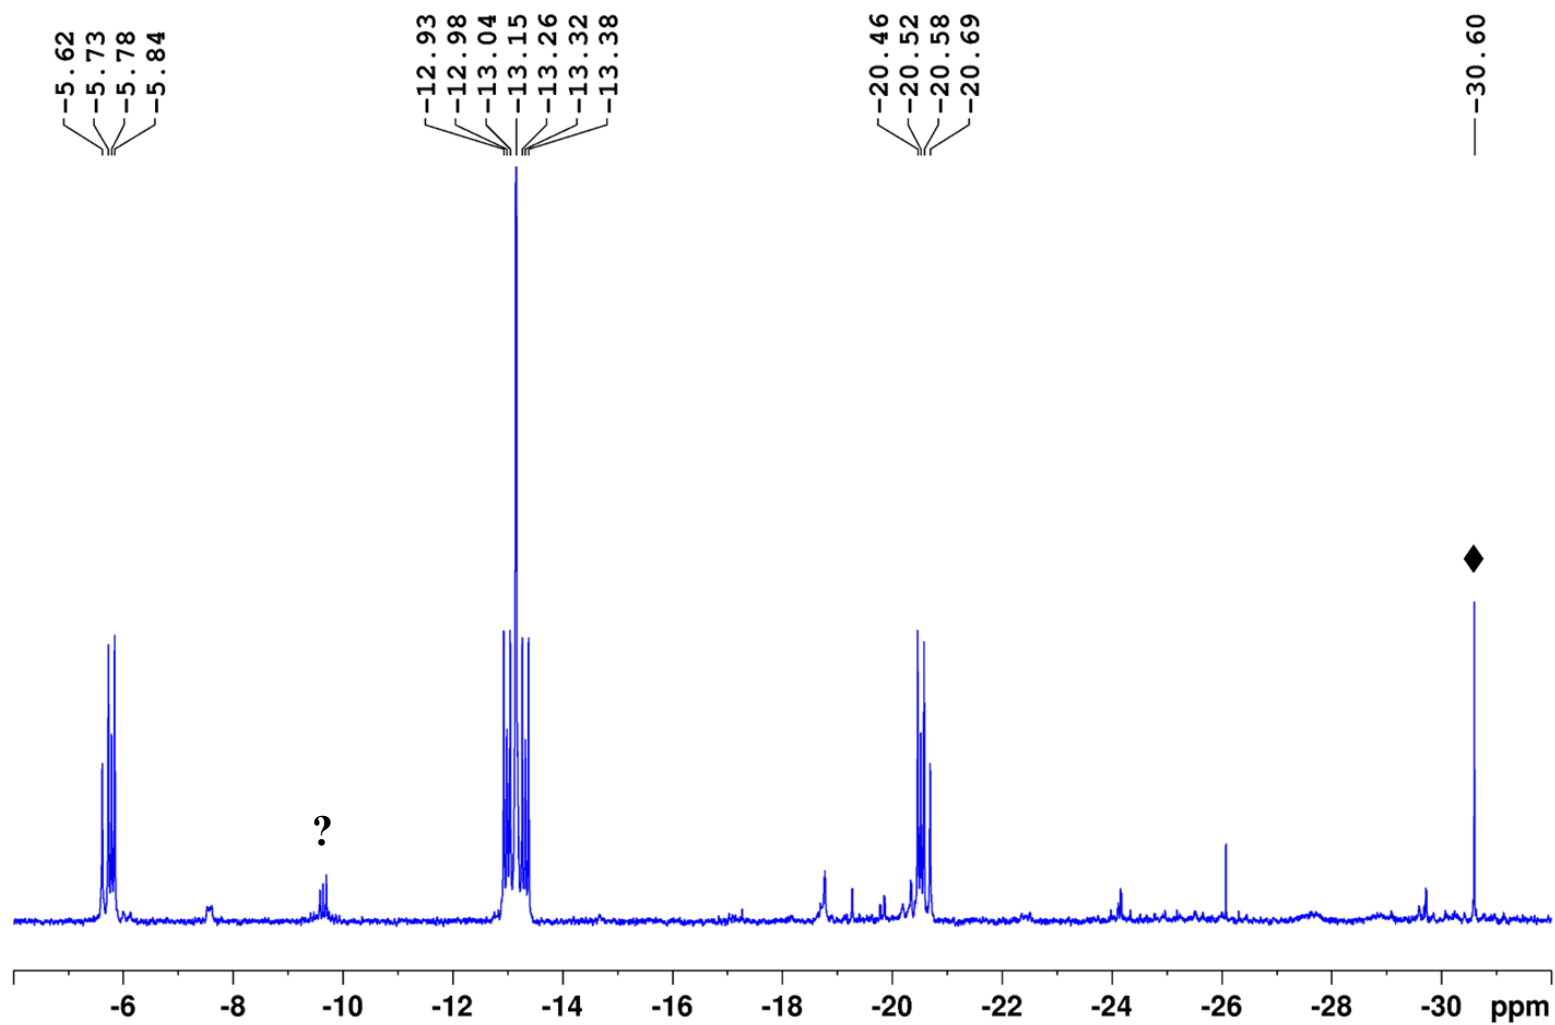

**Figure S16.**  $^{31}\text{P}\{^1\text{H}\}$  NMR spectrum of  $2^{\text{CH}_2\text{-I}}$  in  $\text{CD}_2\text{Cl}_2$ . The additional resonance marked  $\blacklozenge$  corresponds to the decomposition product  $[(\mu\text{-dmpm})_2\text{Pt}_2\text{I}_2]$  (ca. 3%), that marked  $?$  to an unknown byproduct (ca. 3%).

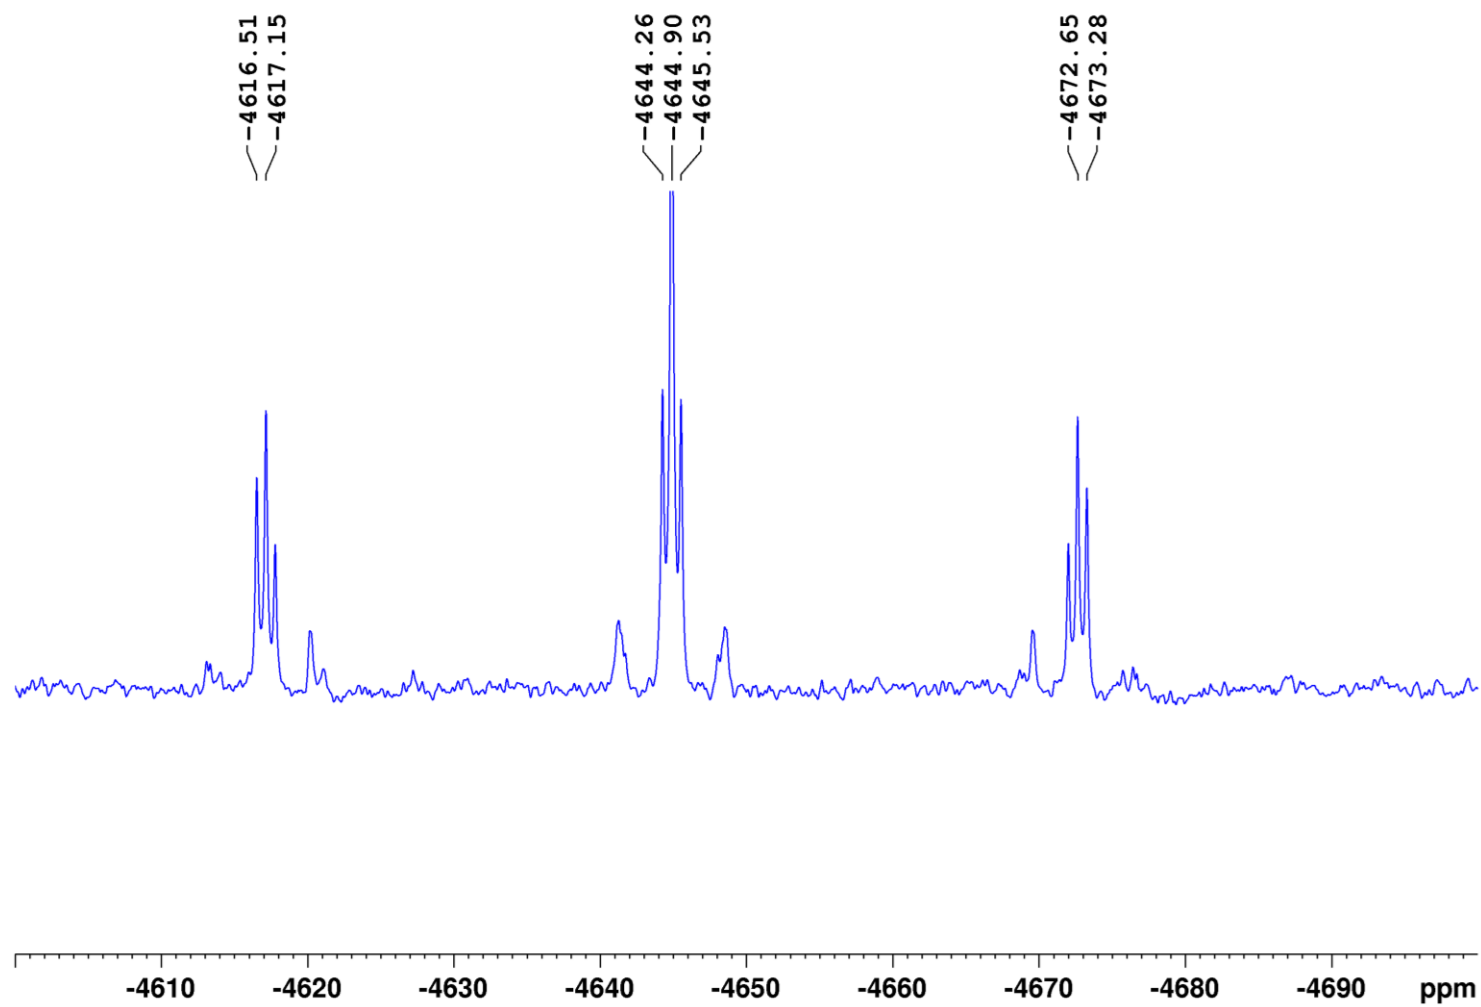

**Figure S17.**  $^{195}\text{Pt}\{^1\text{H}\}$  NMR spectrum of  $2^{\text{CH}_2}\text{-I}$  in  $\text{CD}_2\text{Cl}_2$ .

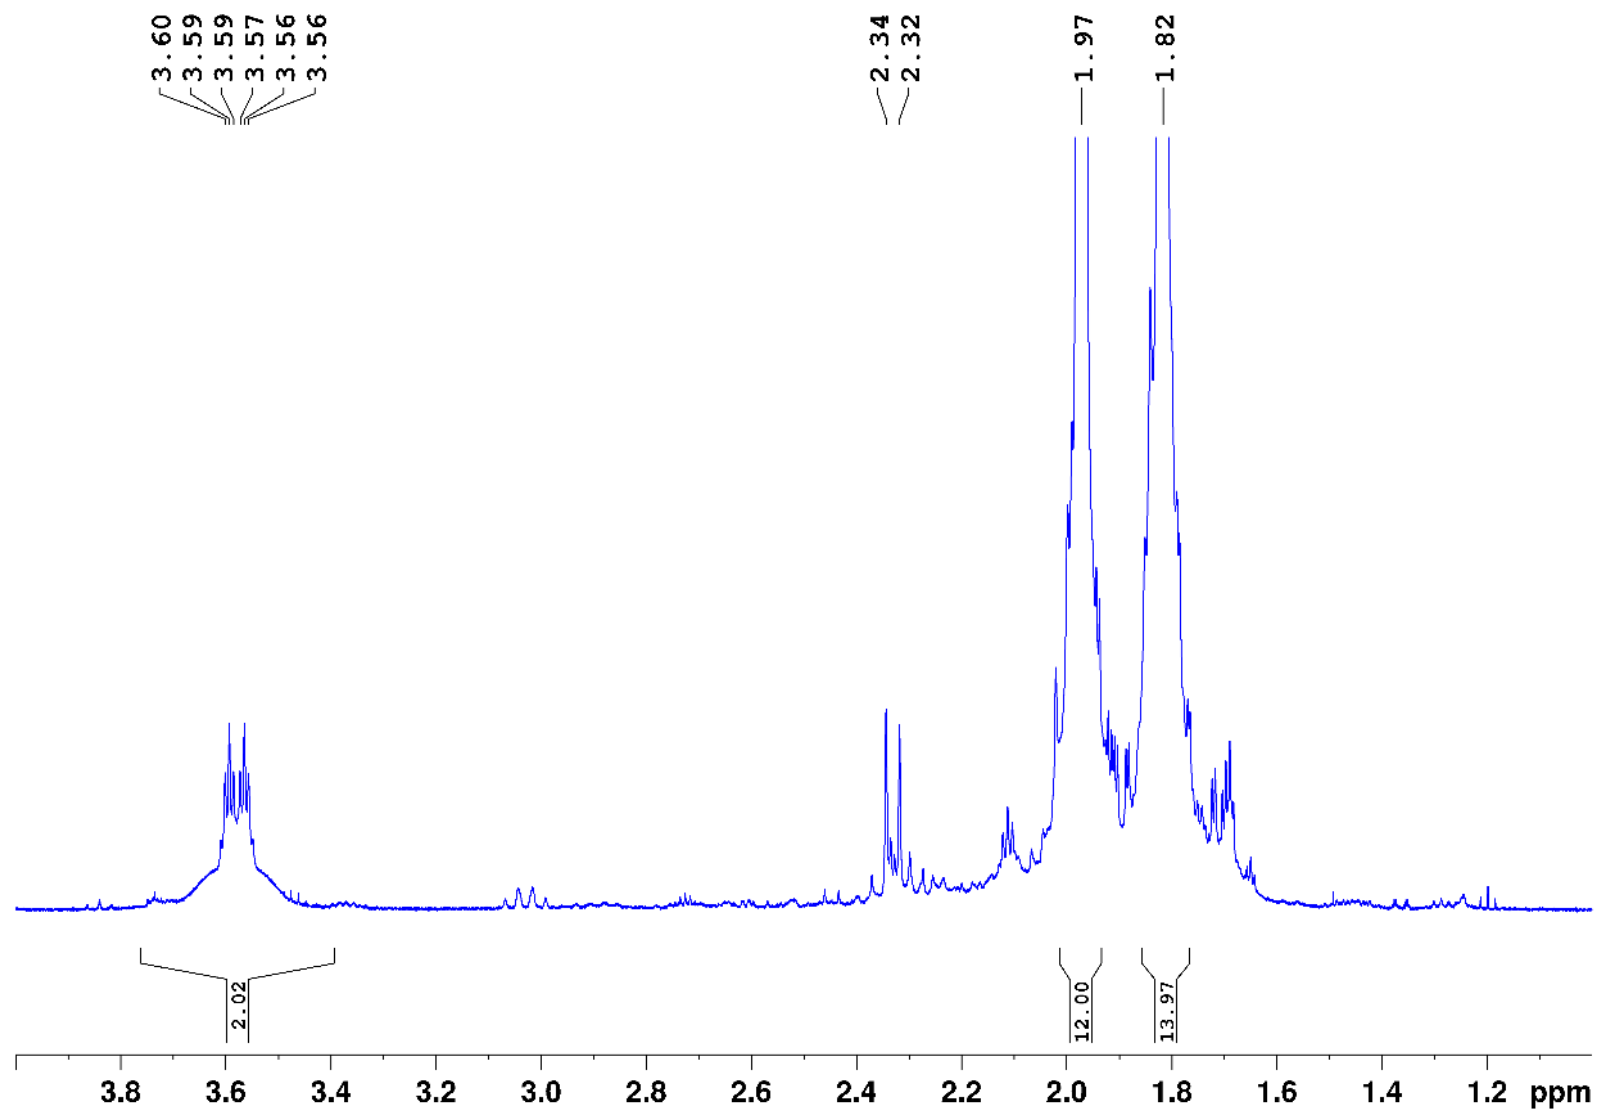

**Figure S18.**  $^1\text{H}$  NMR spectrum of  $2^{\text{CCl}_2}\text{-Cl}$  in  $\text{CDCl}_3$ , showing small amounts of decomposition (ca. 5%) after 30 min at rt.

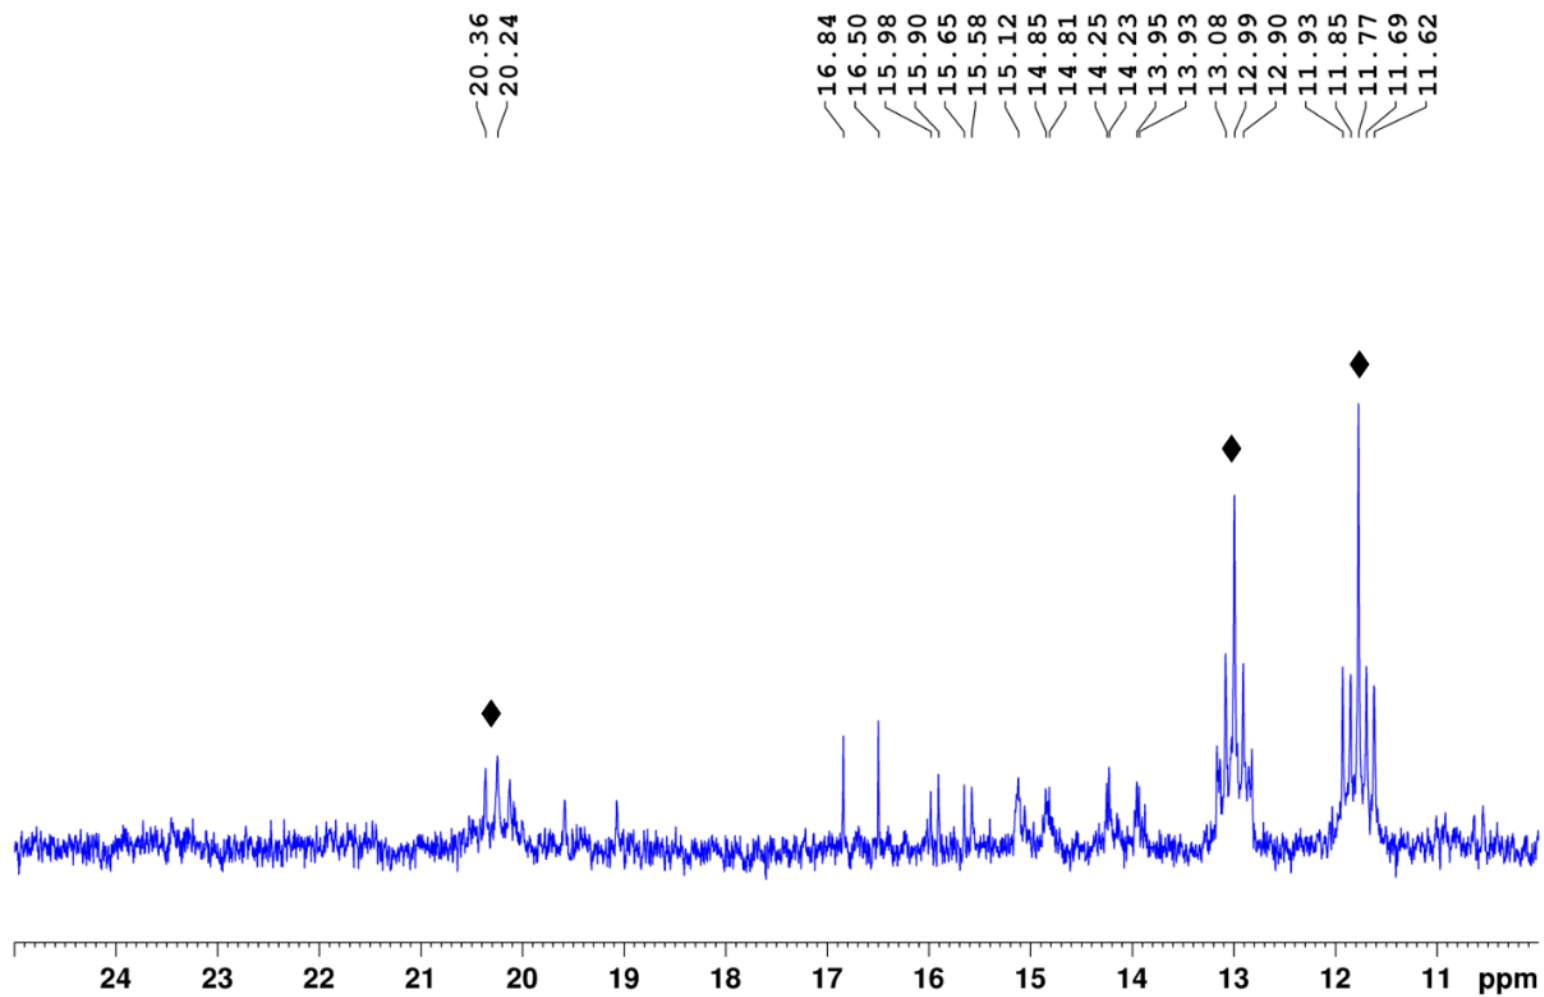

**Figure S19.**  $^{13}\text{C}$   $\{^1\text{H}\}$  NMR spectrum of  $2^{\text{CCl}_2}\text{-Cl}$  (♦) in  $\text{CDCl}_3$  after 5 h at rt, already showing significant amounts of decomposition.

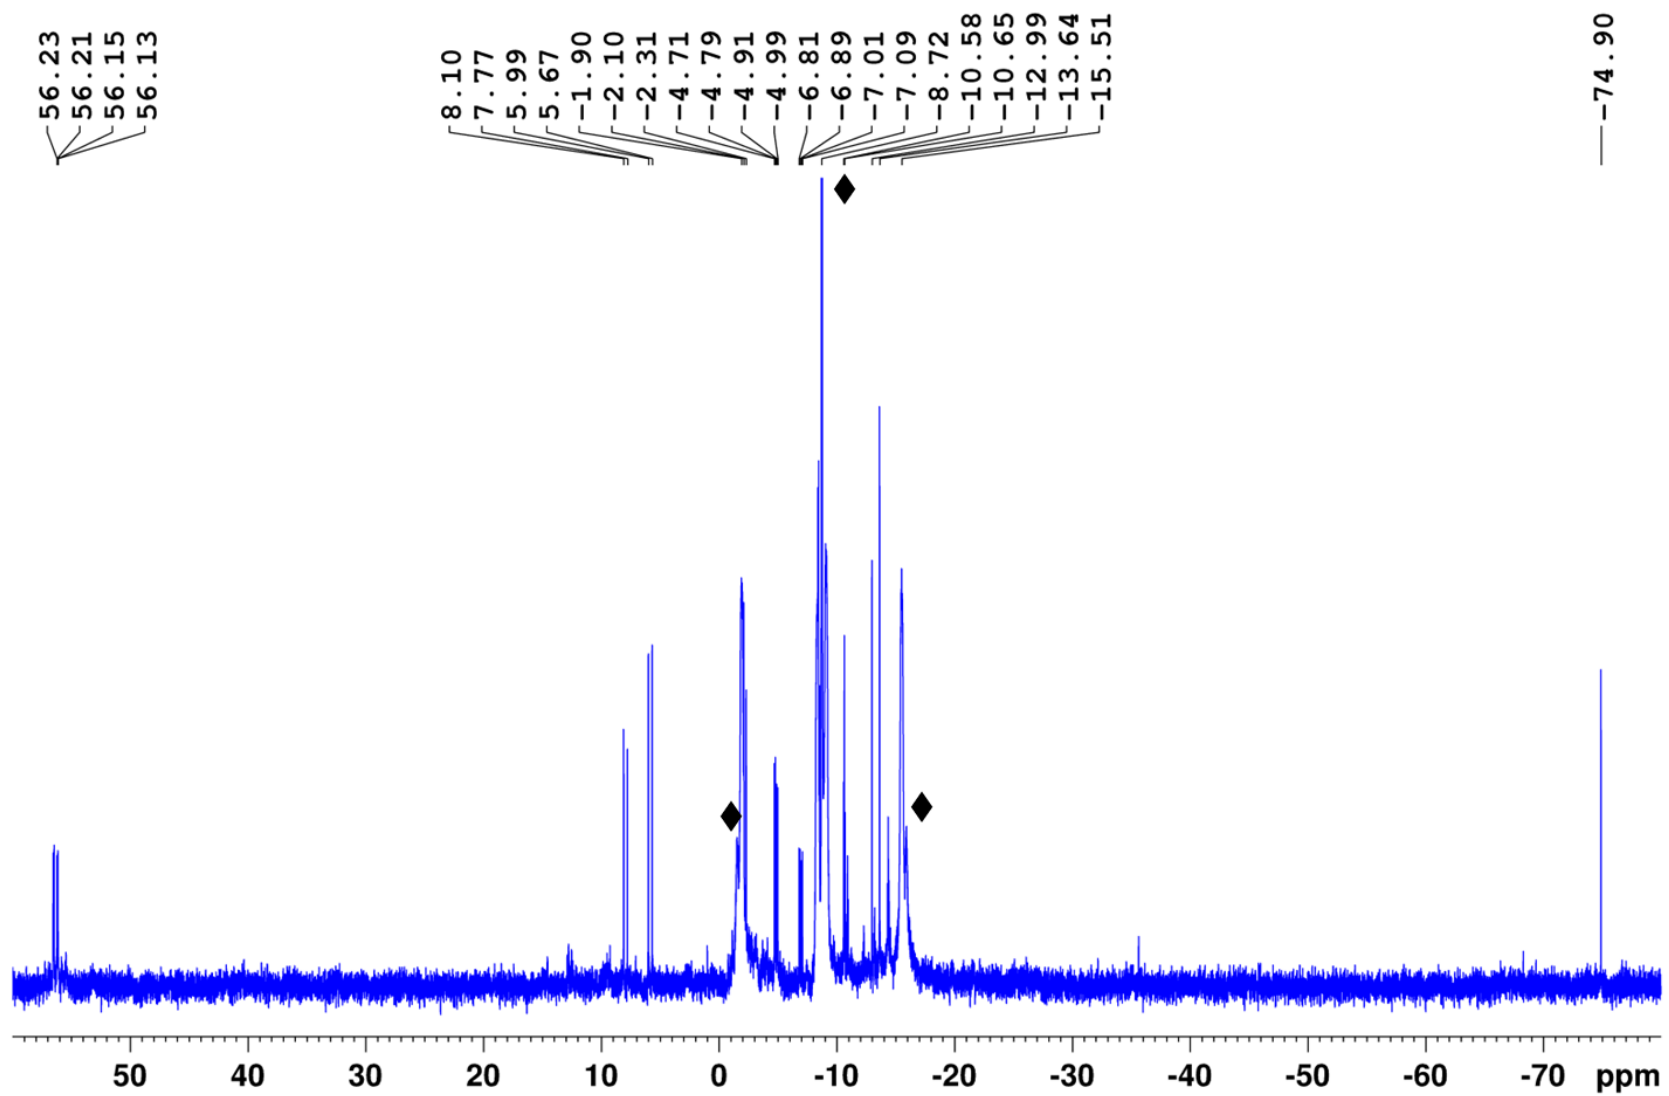

**Figure S20.**  $^{31}\text{P}\{^1\text{H}\}$  NMR spectrum of  $2^{\text{CCl}_2}\text{-Cl}$  (♦) in  $\text{CDCl}_3$  after 1 h at rt, already showing ca. 13% of decomposition

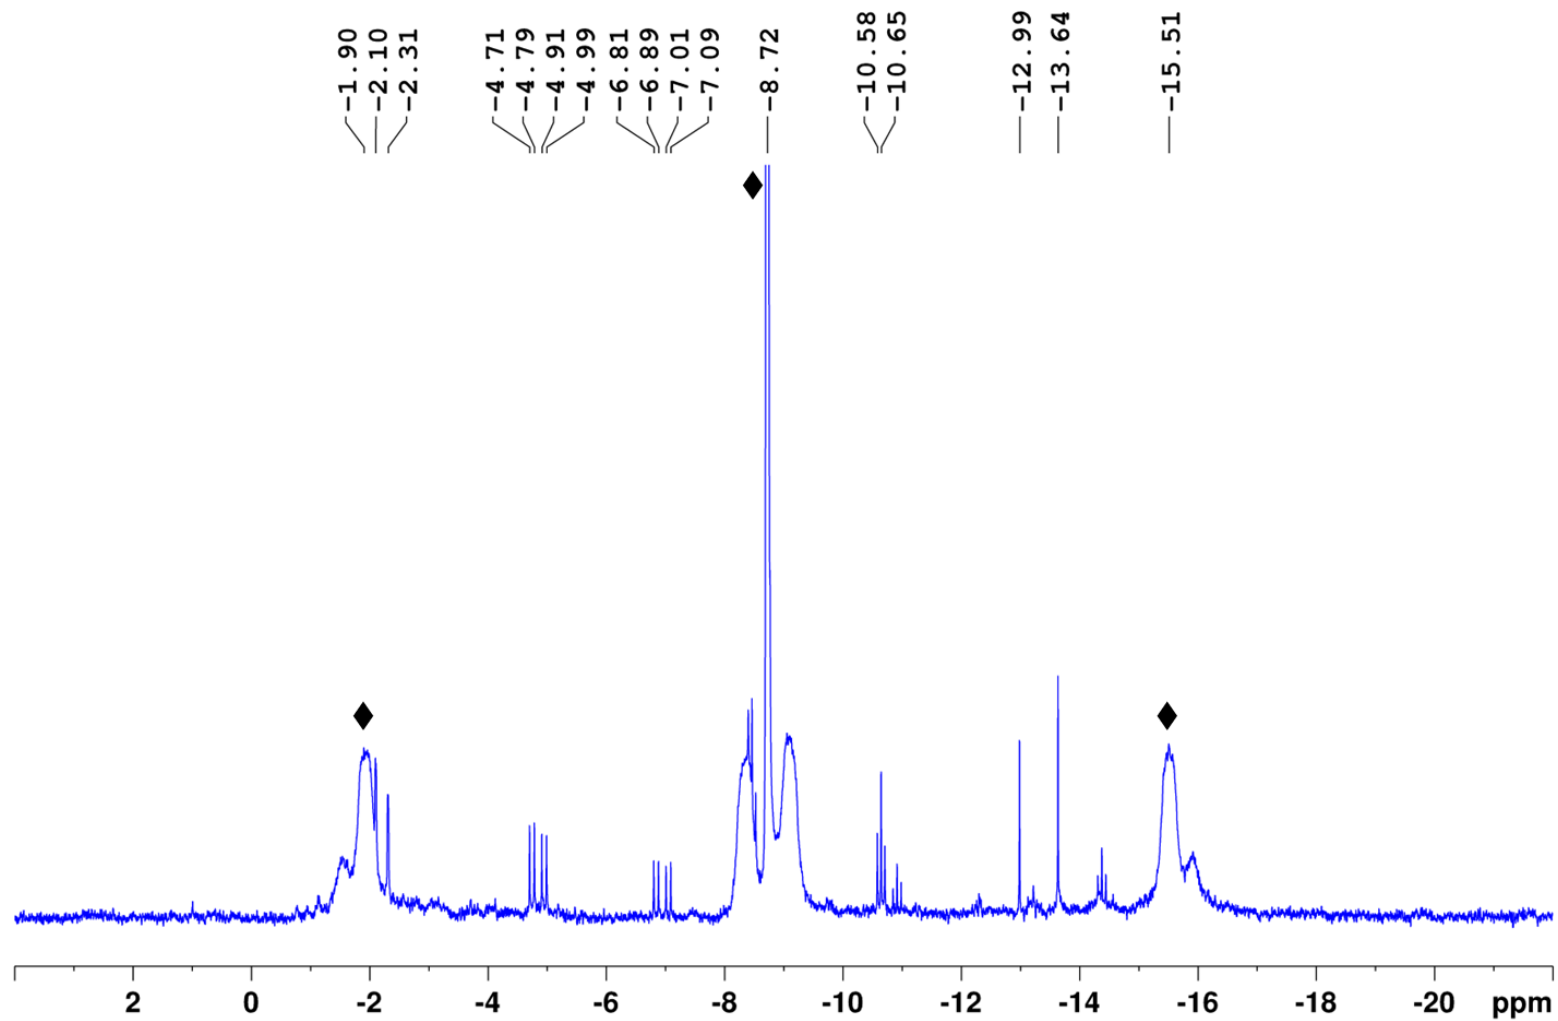

**Figure S21.** Zoom-in on the  $^{31}\text{P}\{^1\text{H}\}$  NMR resonance of  $2^{\text{CCl}_2}\text{-Cl}$  ( $\blacklozenge$ ) in  $\text{CDCl}_3$  after 1 h at rt.

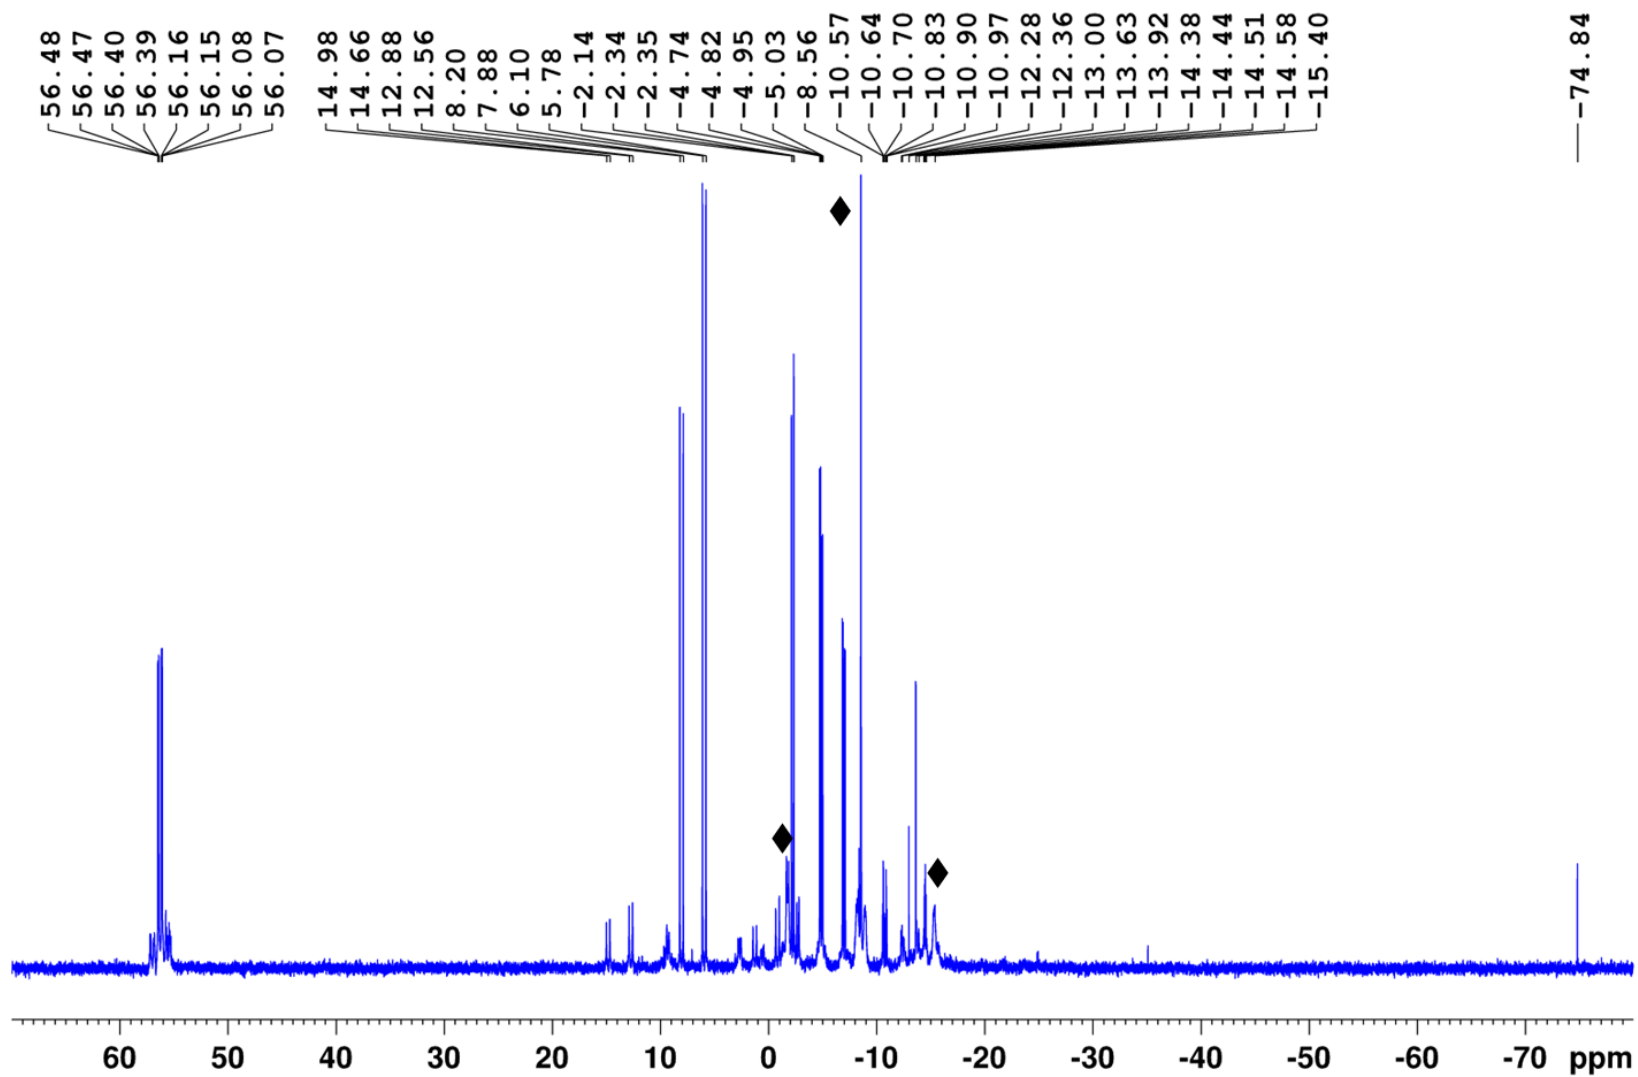

Figure S22.  $^{31}\text{P}\{^1\text{H}\}$  NMR spectrum of  $2^{\text{CCl}_2}\text{-Cl}$  (♦) after 16 h at rt in  $\text{CDCl}_3$ , showing ca. 68% decomposition to unidentified products.

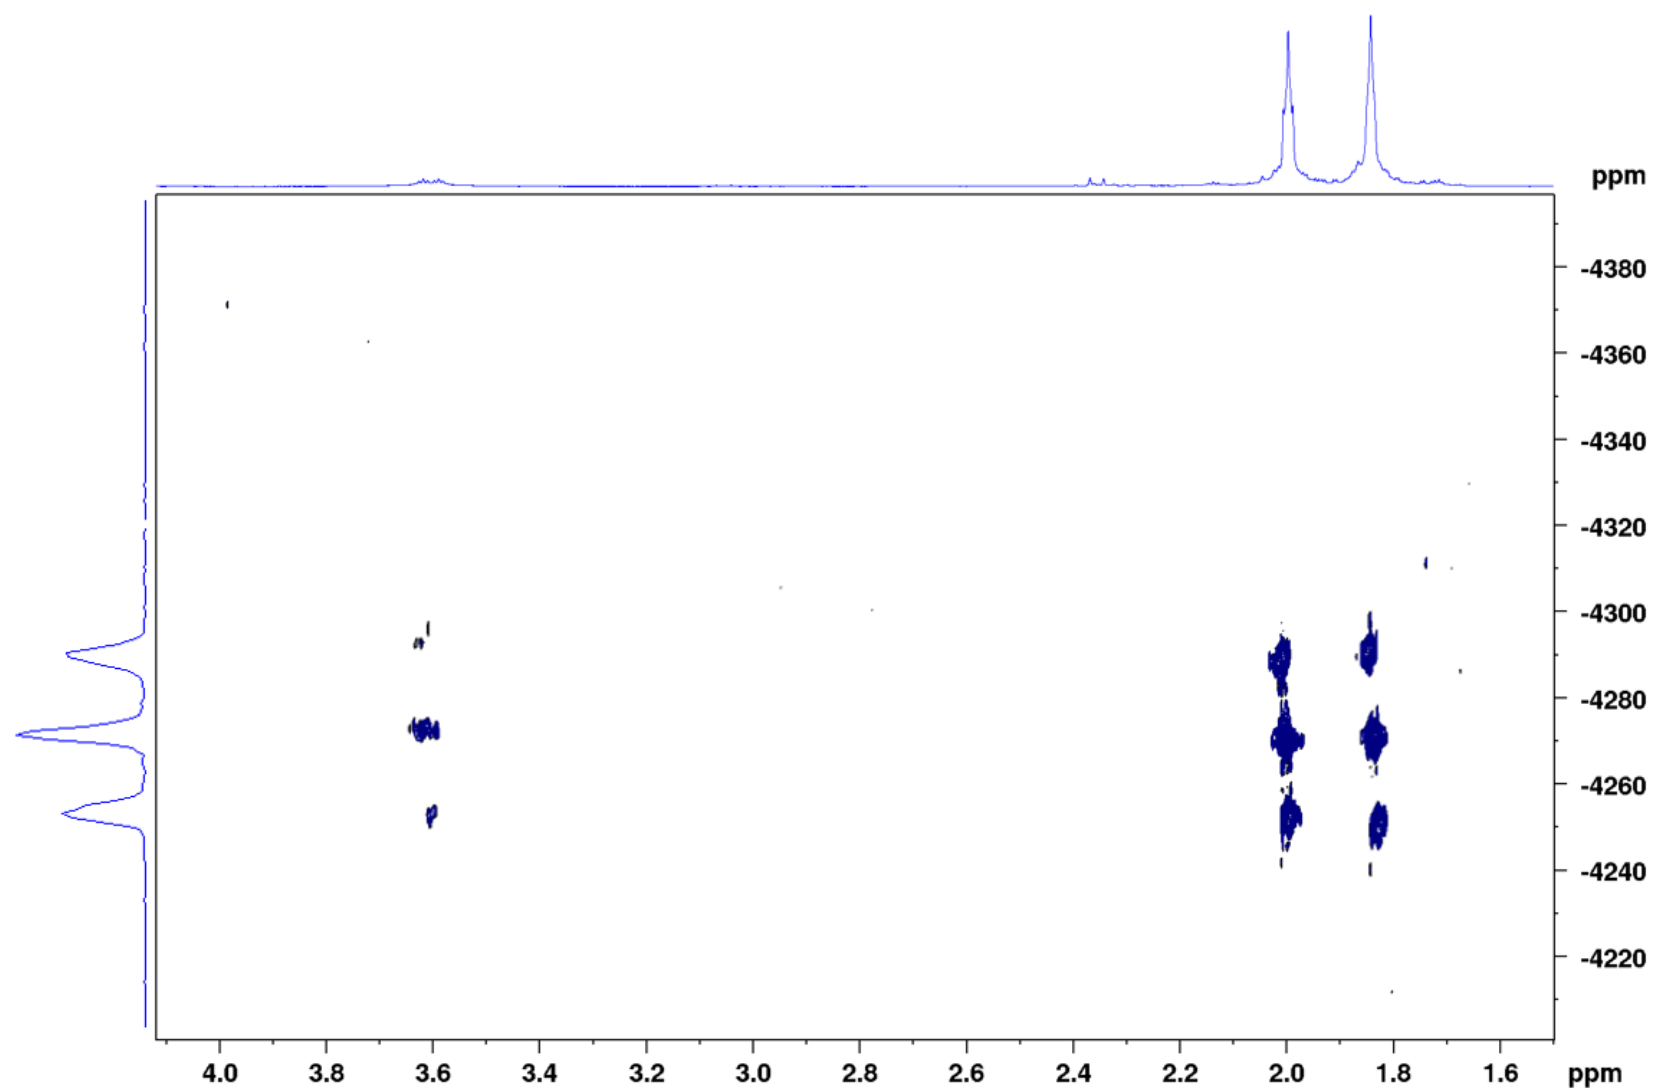

**Figure S23.** Zoom-in on the  $^1\text{H}$ - $^{195}\text{Pt}\{^1\text{H}\}$  HMQC spectrum of  $2^{\text{CCl}_2}\text{-Cl}$  in  $\text{CDCl}_3$  after 2 h at rt.

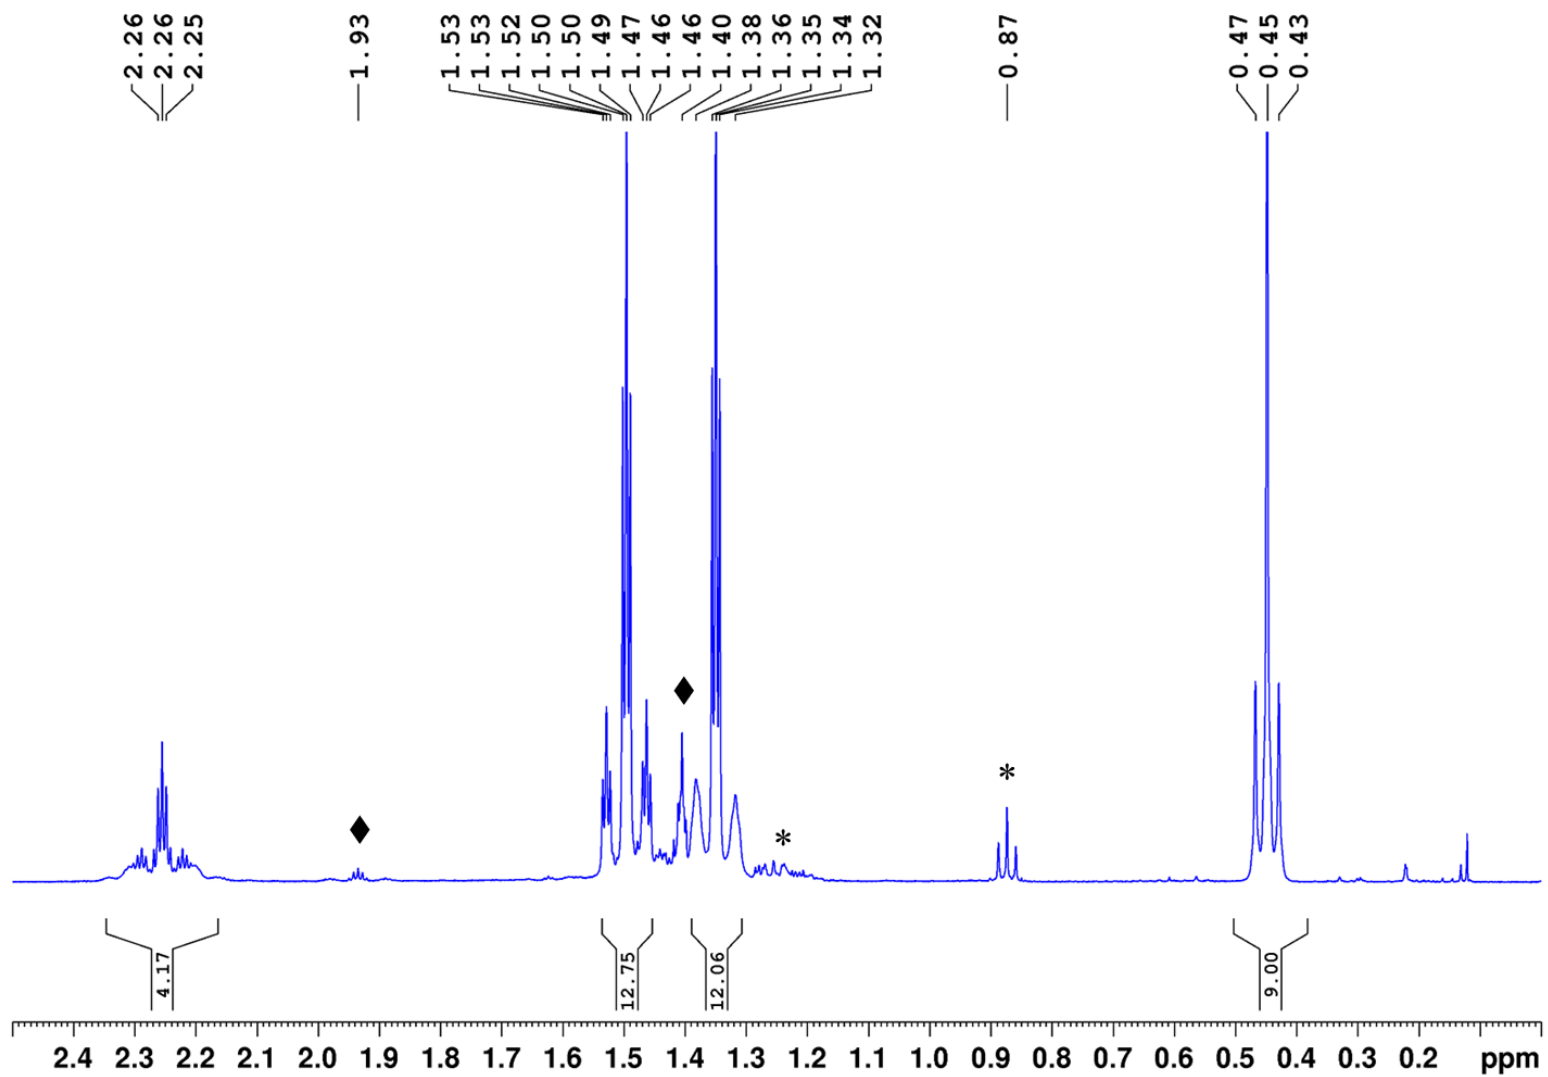

**Figure S24.**  $^1\text{H}$  NMR spectrum of  $3^{\text{SiMe}_3}\text{-Cl}$  in  $\text{C}_6\text{D}_6$ . The additional resonances marked  $\blacklozenge$  correspond to the decomposition product  $[(\mu\text{-dmpm})_2\text{Pt}_2\text{Cl}_2]$ , those marked \* to residual pentane.

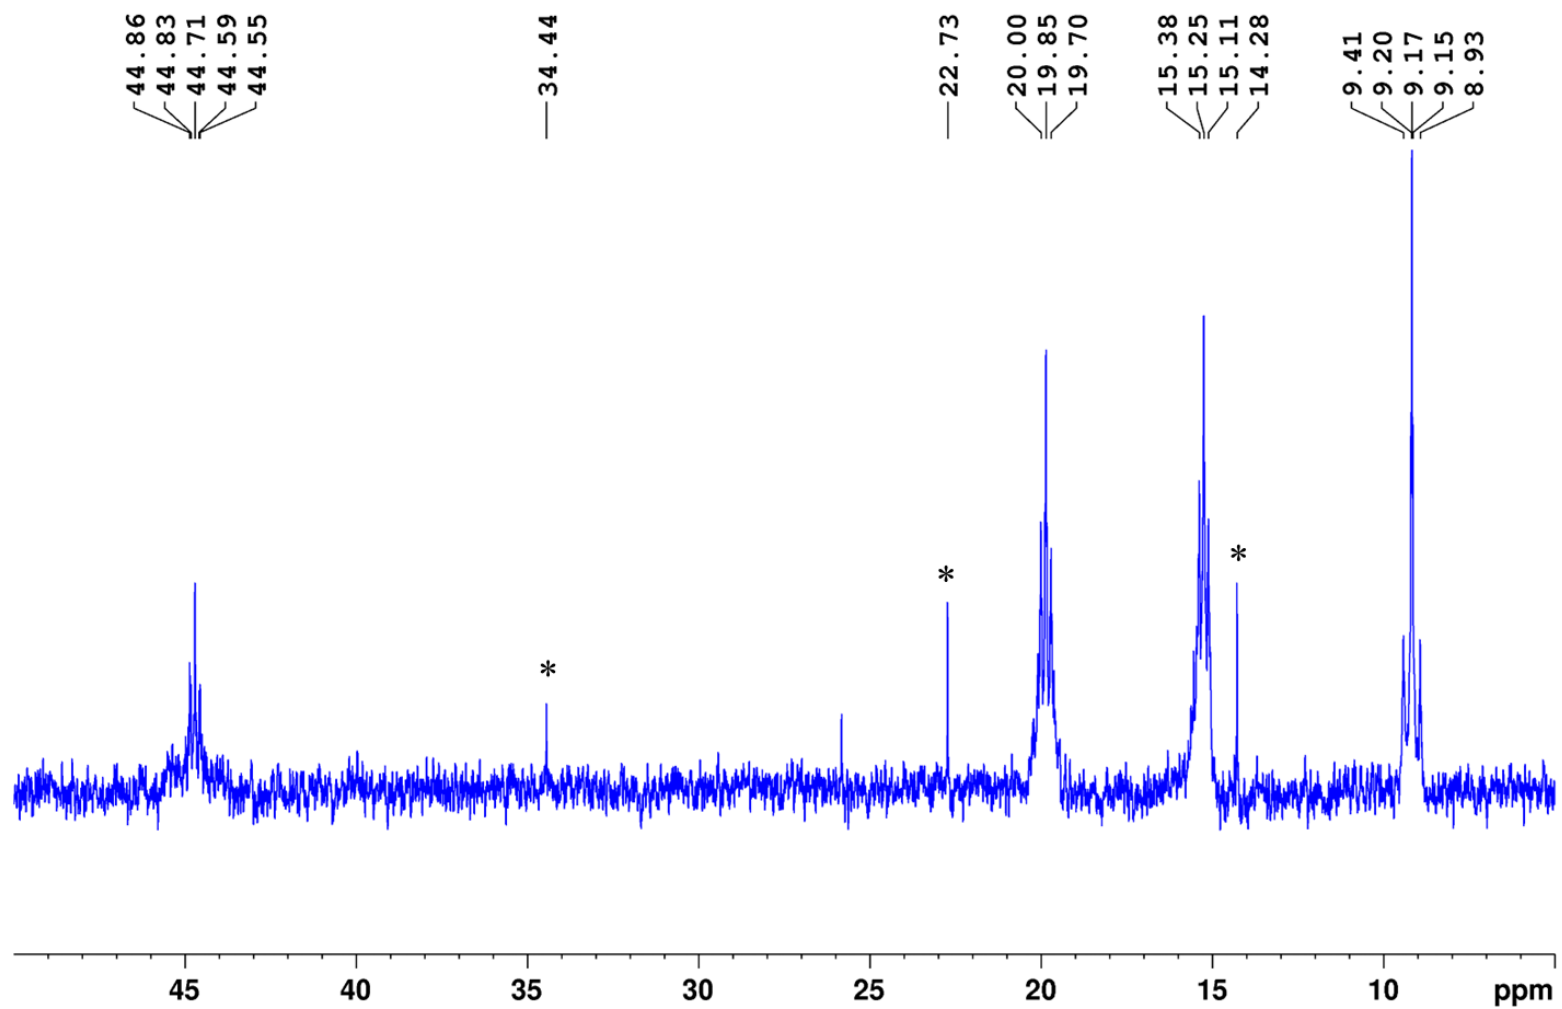

**Figure S25.**  $^{13}\text{C}\{^1\text{H}\}$  NMR spectrum of  $3^{\text{SiMe}_3}\text{-Cl}$  in  $\text{C}_6\text{D}_6$ . The additional resonances marked \* correspond to residual pentane.

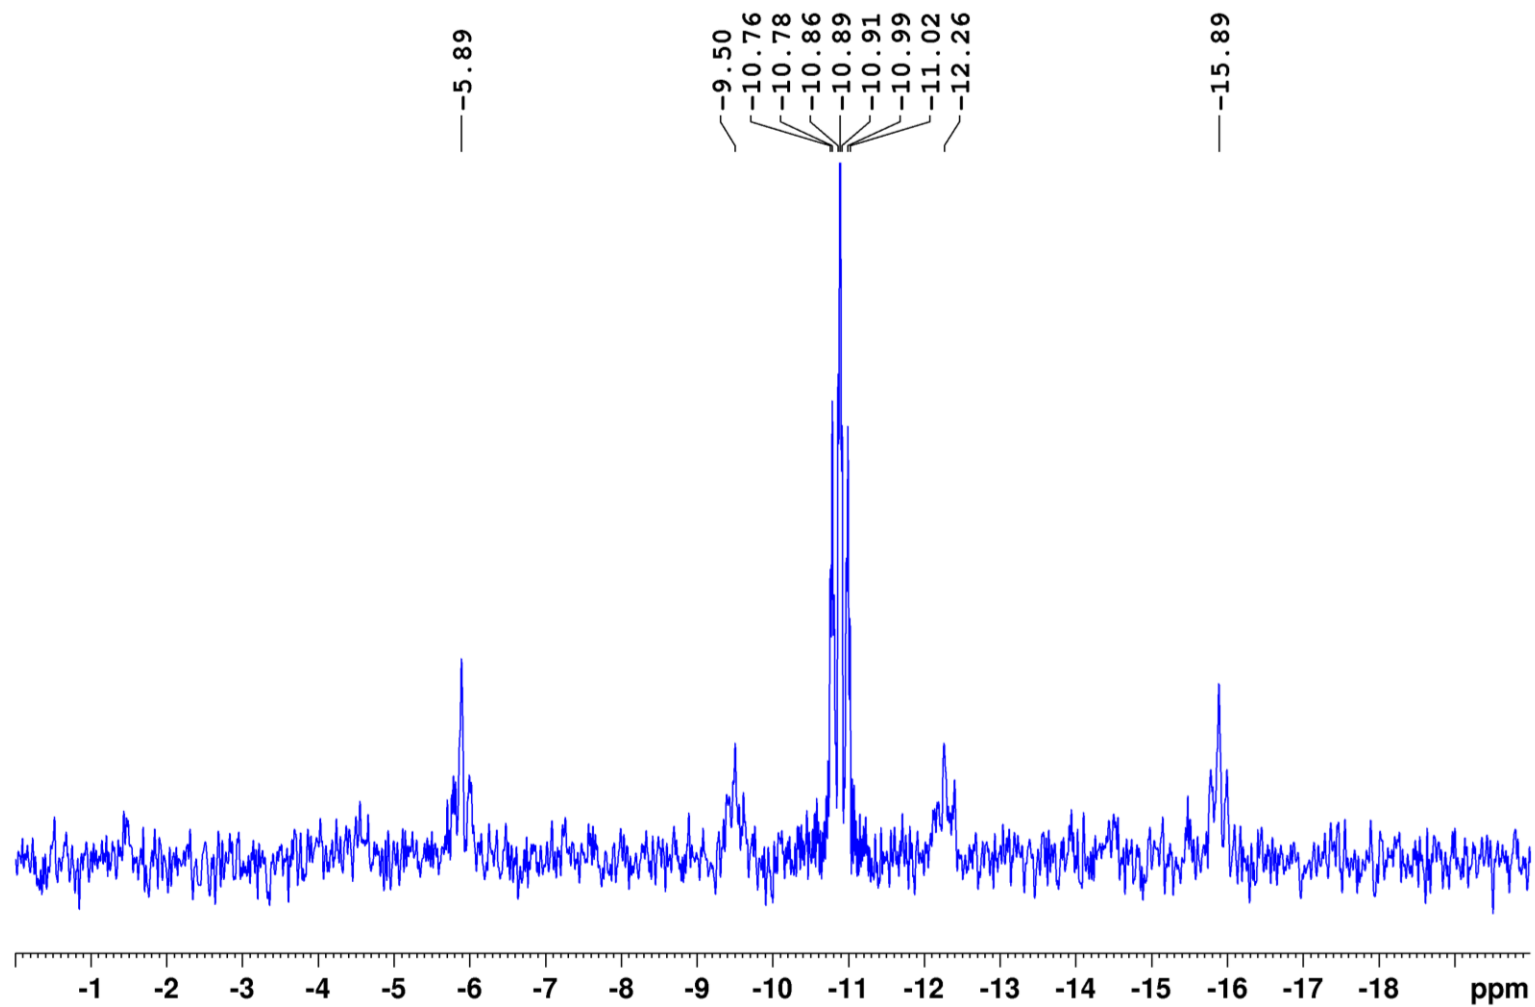

**Figure S26.**  $^{29}\text{Si}\{^1\text{H}\}$  NMR spectrum of  $3\text{SiMe}_3\text{-Cl}$  in  $\text{C}_6\text{D}_6$ .

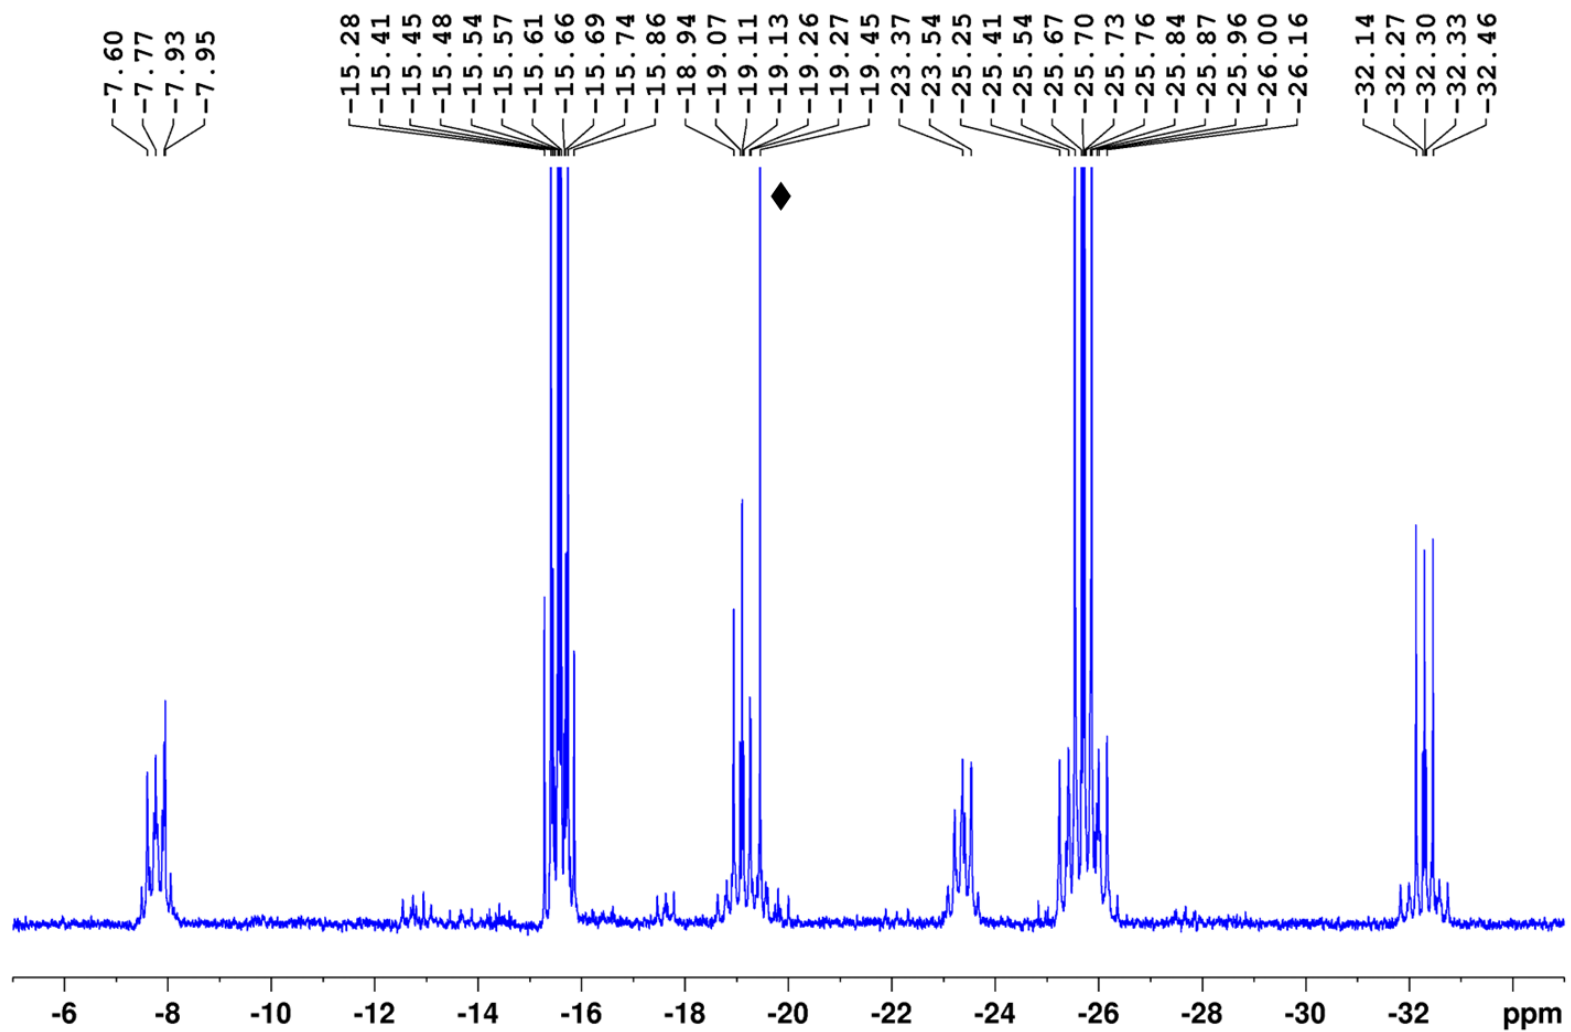

**Figure S27.**  $^{31}\text{P}\{^1\text{H}\}$  NMR spectrum of  $3^{\text{SiMe}_3}\text{-Cl}$  in  $\text{C}_6\text{D}_6$ . The additional resonance marked  $\blacklozenge$  correspond to the decomposition product  $[(\mu\text{-dmpm})_2\text{Pt}_2\text{Cl}_2]$  (ca. 4%).

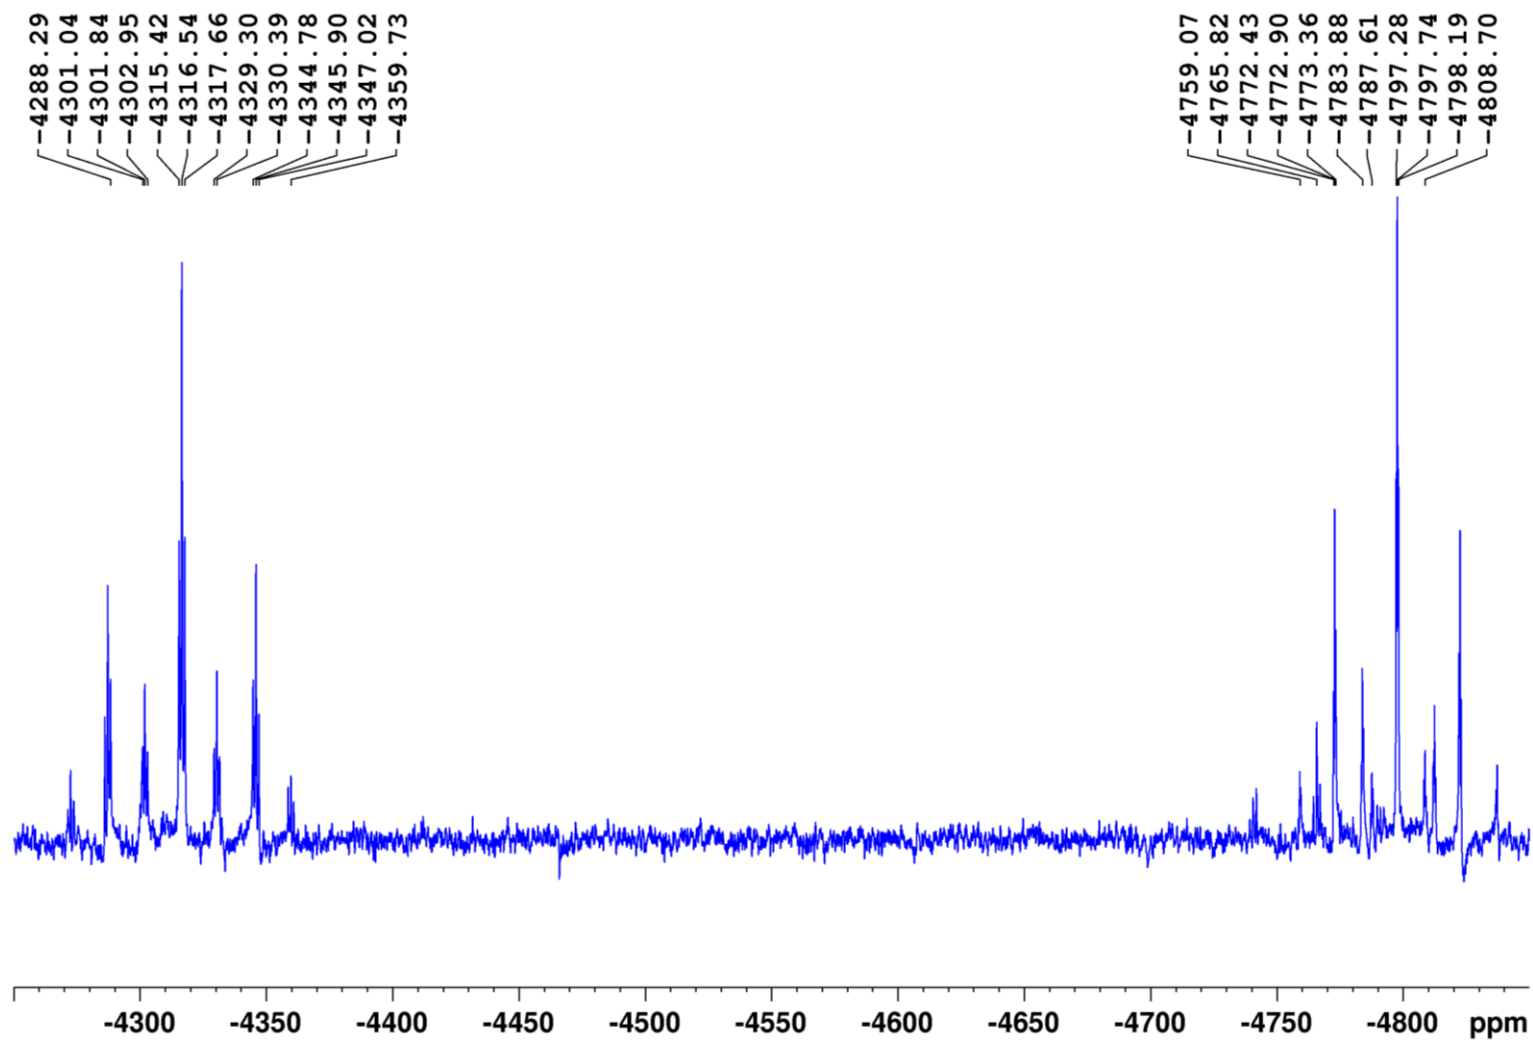

**Figure S28.**  $^{195}\text{Pt}\{^1\text{H}\}$  NMR spectrum of  $3^{\text{SiMe}_3}\text{-Cl}$  in  $\text{C}_6\text{D}_6$ .

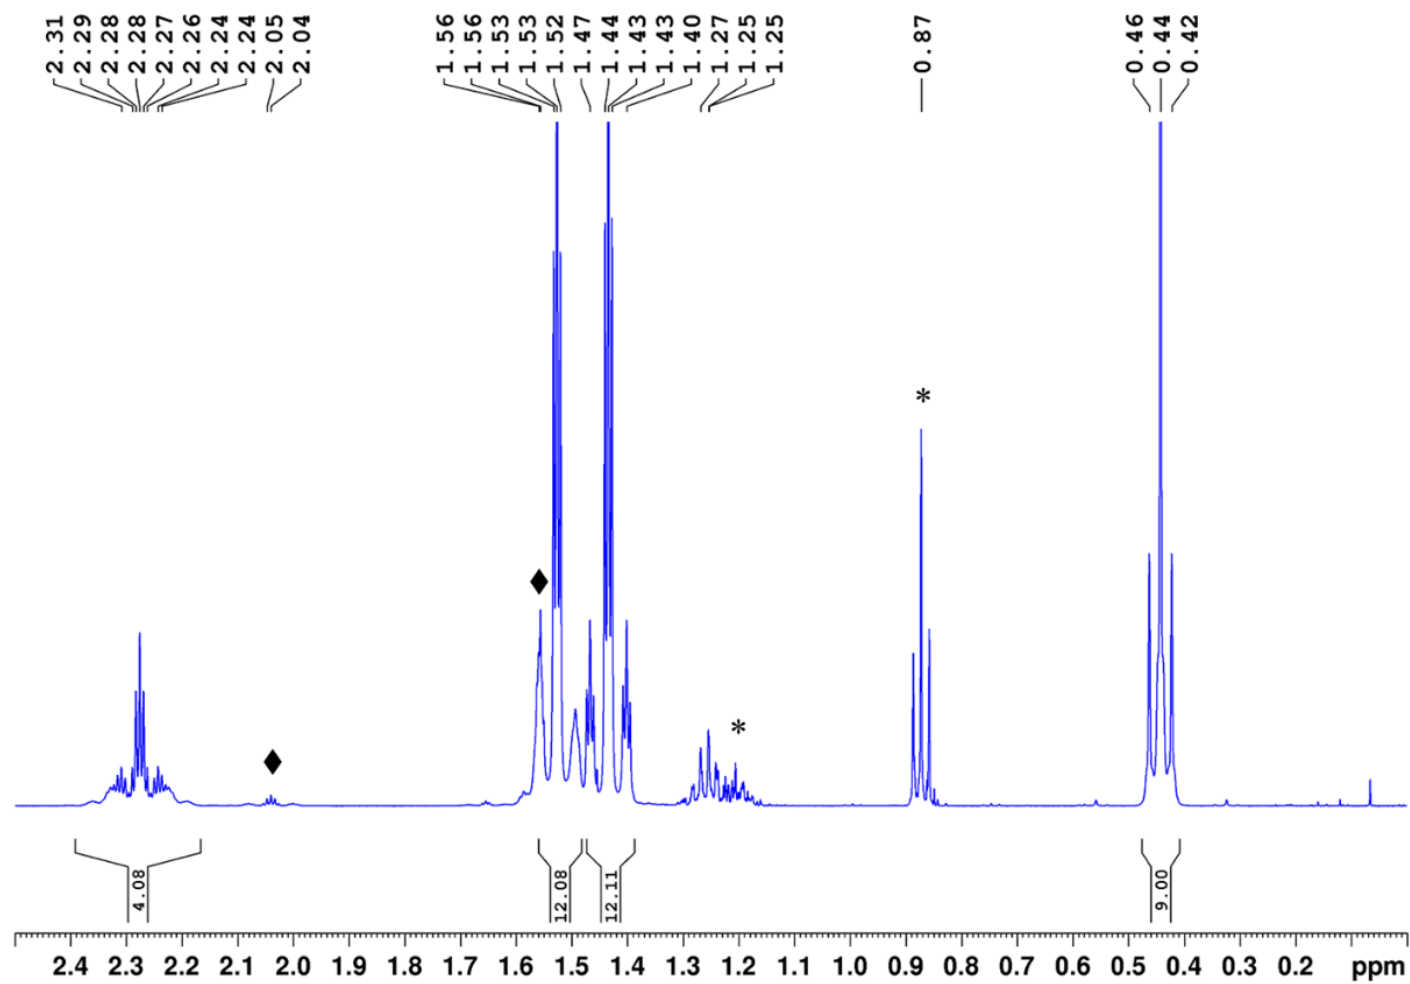

**Figure S29.**  $^1\text{H}$  NMR spectrum of  $3^{\text{SiMe}_3}\text{-I}$  in  $\text{C}_6\text{D}_6$ . The additional resonances marked  $\blacklozenge$  correspond to the decomposition product  $[(\mu\text{-dmpm})_2\text{Pt}_2\text{I}_2]$ , those marked \* to residual pentane.

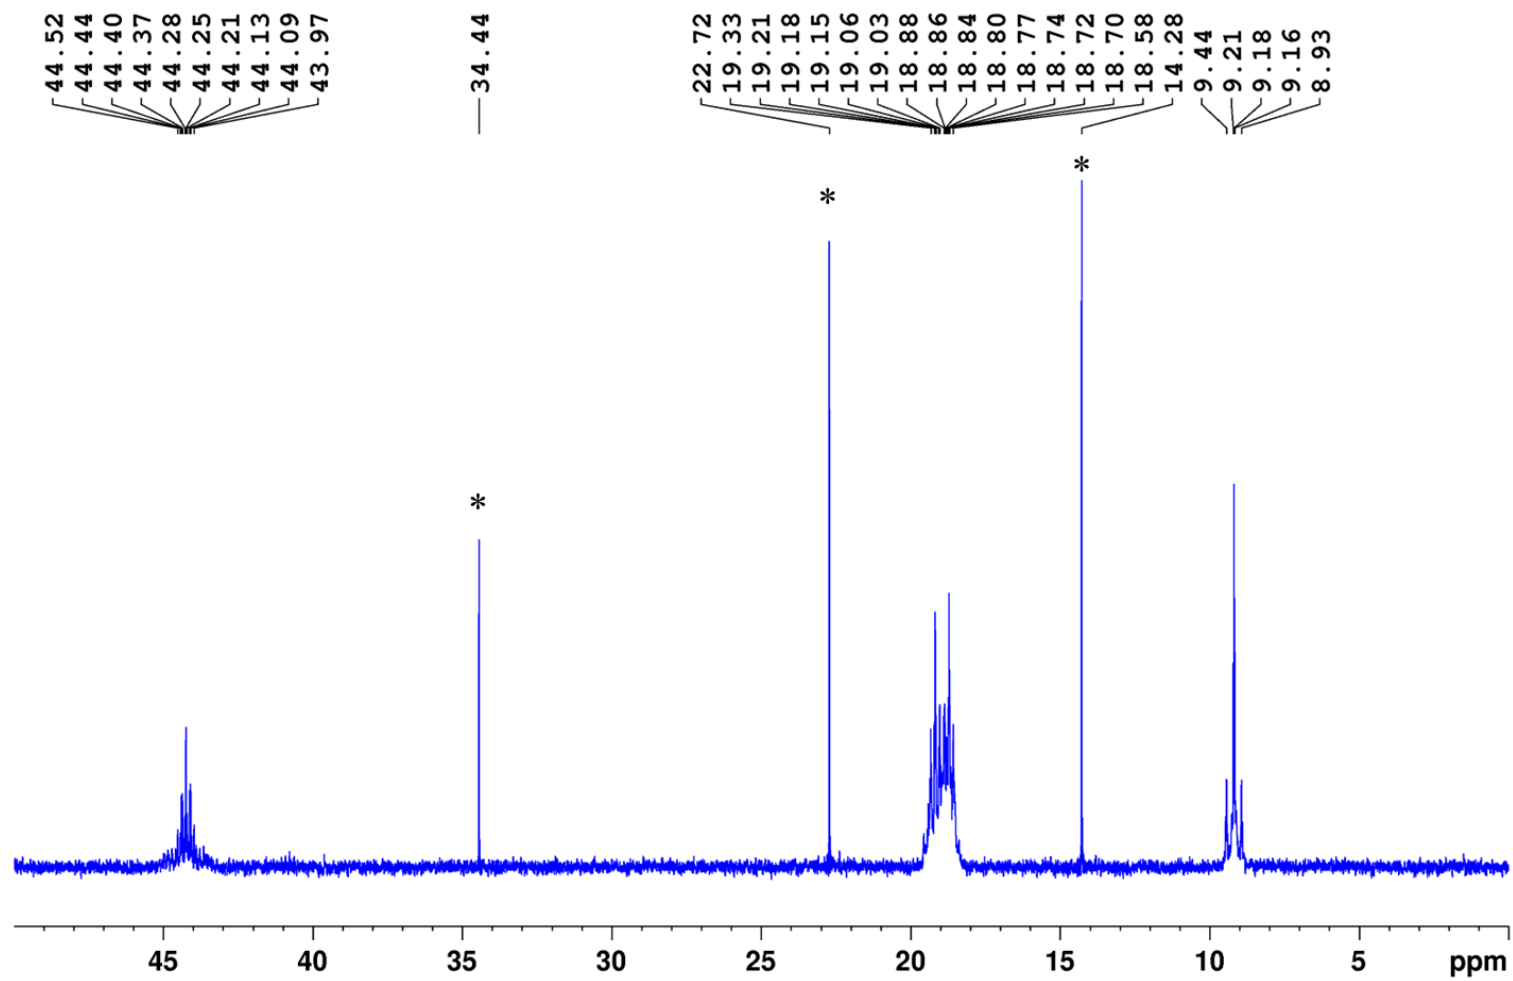

**Figure S30.**  $^{13}\text{C}\{^1\text{H}\}$  NMR spectrum of  $3^{\text{SiMe}_3}\text{-I}$  in  $\text{C}_6\text{D}_6$ . The additional resonances marked \* correspond to residual pentane.

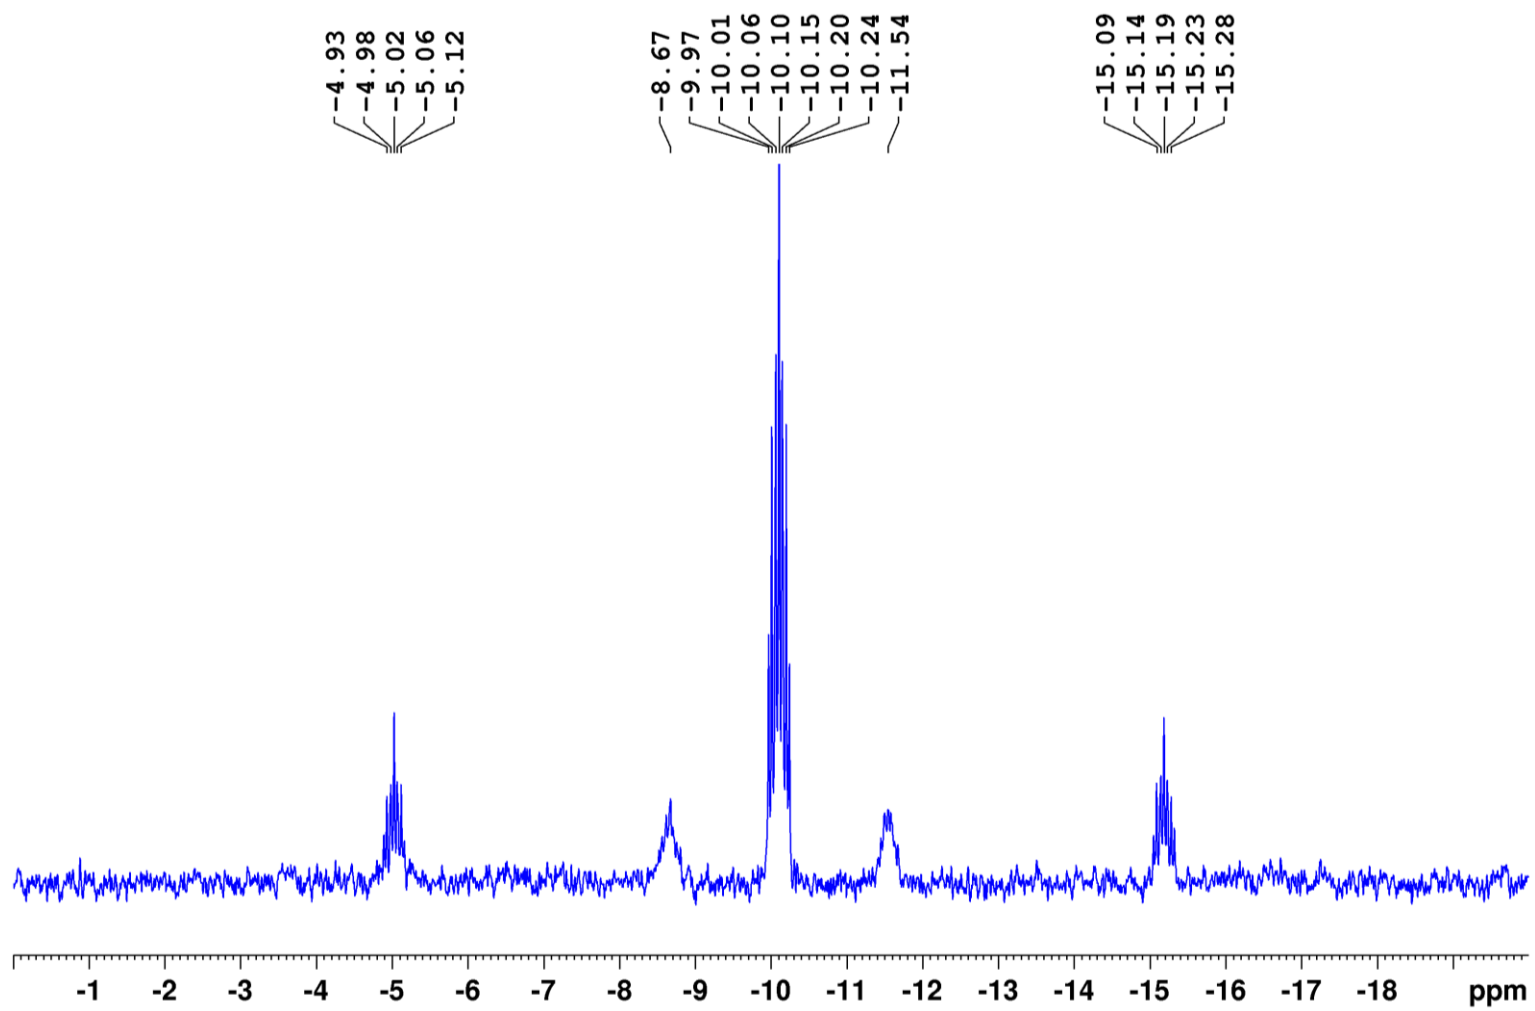

Figure S31.  $^{29}\text{Si}\{^1\text{H}\}$  NMR spectrum of  $3^{\text{SiMe}_3}\text{-I}$  in  $\text{C}_6\text{D}_6$ .

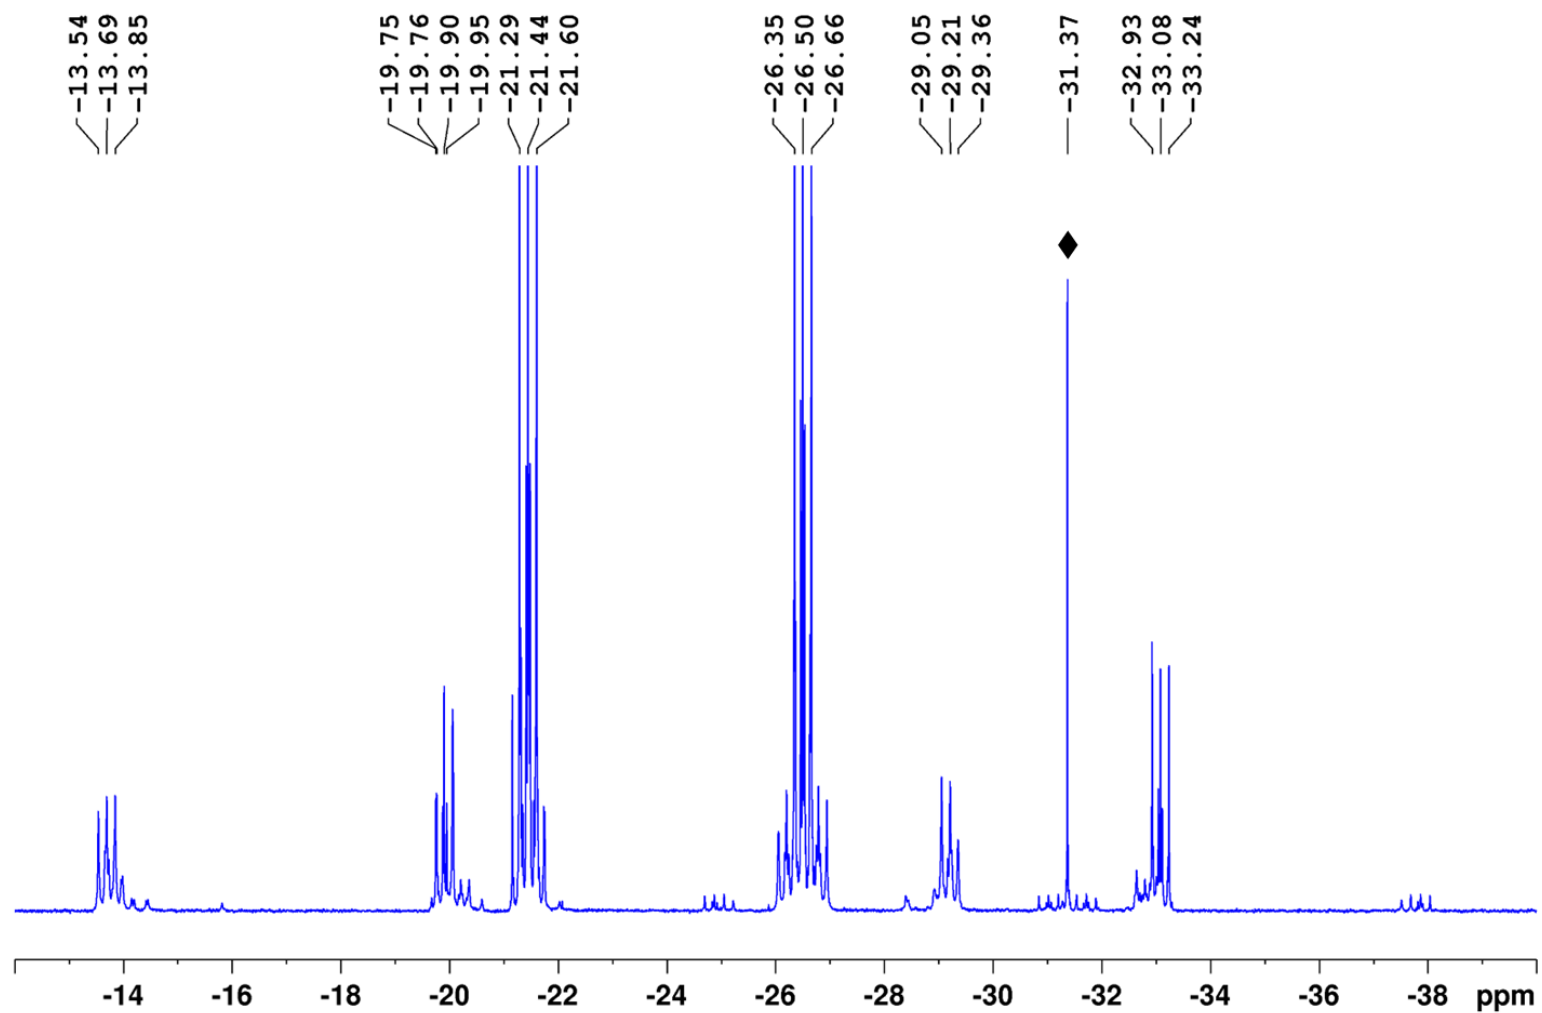

**Figure S32.**  $^{31}\text{P}\{^1\text{H}\}$  NMR spectrum of  $3^{\text{SiMe}_3}\text{-I}$  in  $\text{C}_6\text{D}_6$ . The additional resonance marked  $\blacklozenge$  corresponds to the decomposition product  $[(\mu\text{-dmpm})_2\text{Pt}_2\text{I}_2]$  (ca. 5%).

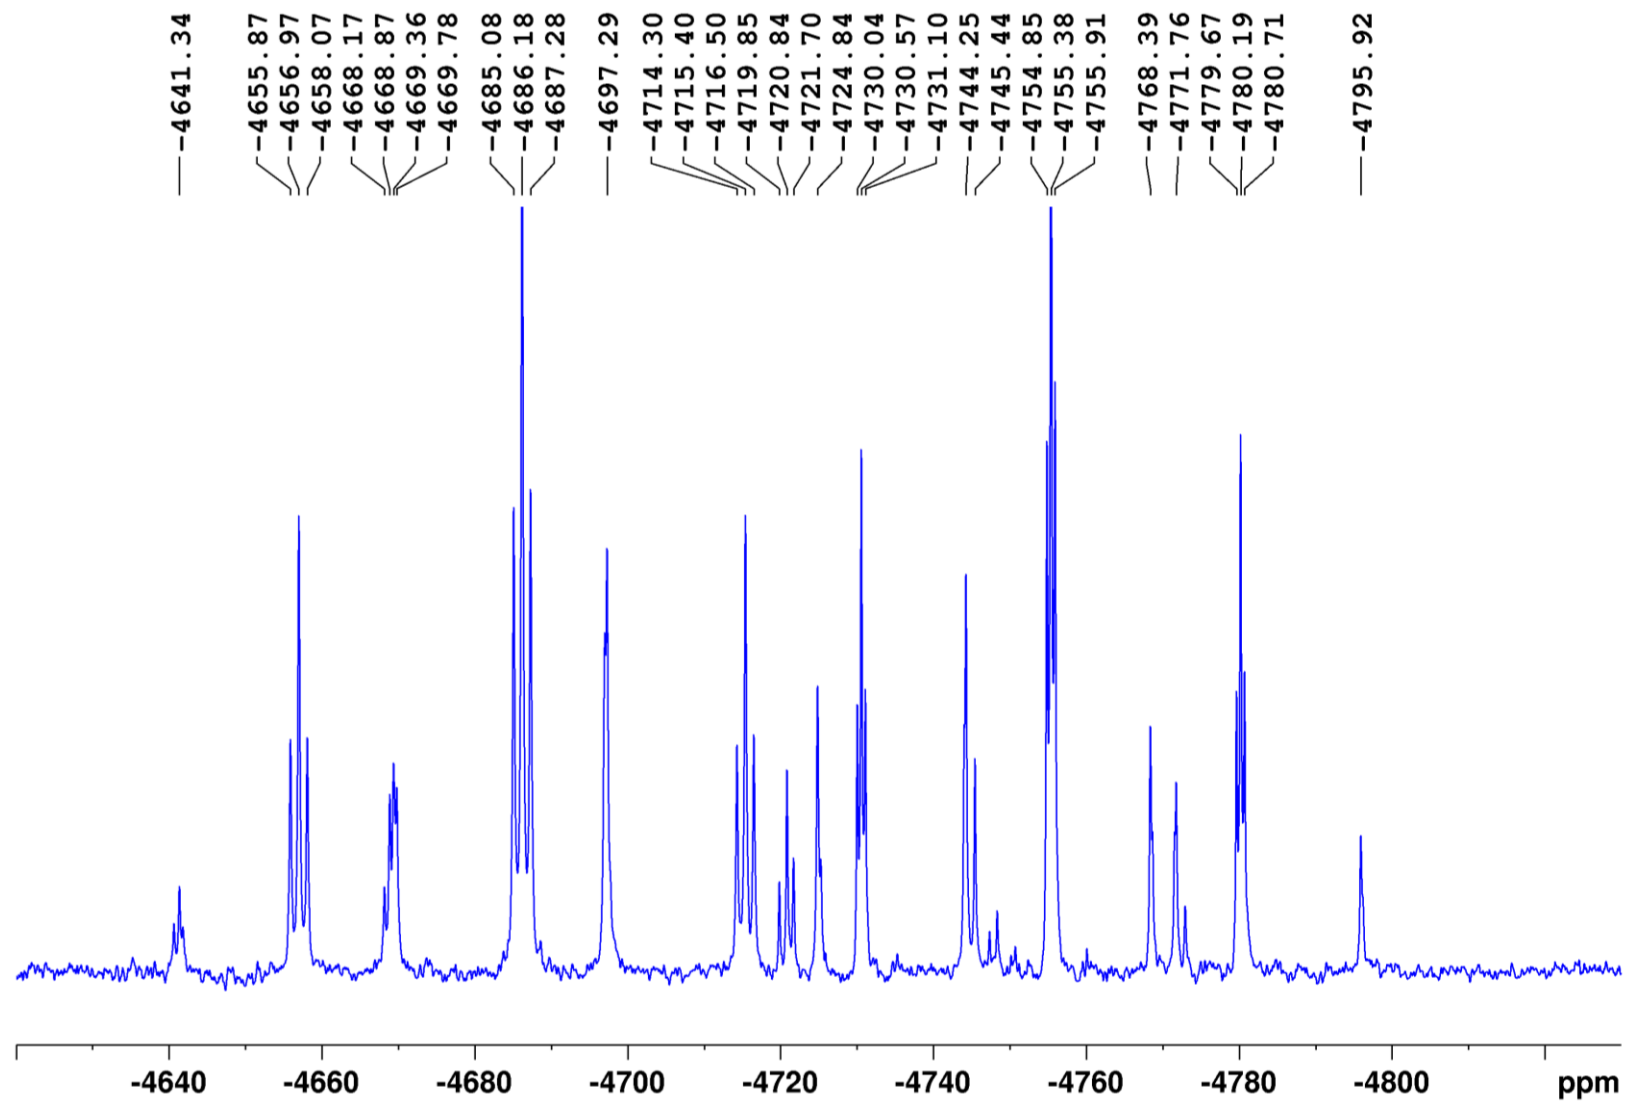

Figure S33.  $^{195}\text{Pt}\{^1\text{H}\}$  NMR spectrum of  $3^{\text{SiMe}_3}\text{-I}$  in  $\text{C}_6\text{D}_6$ .

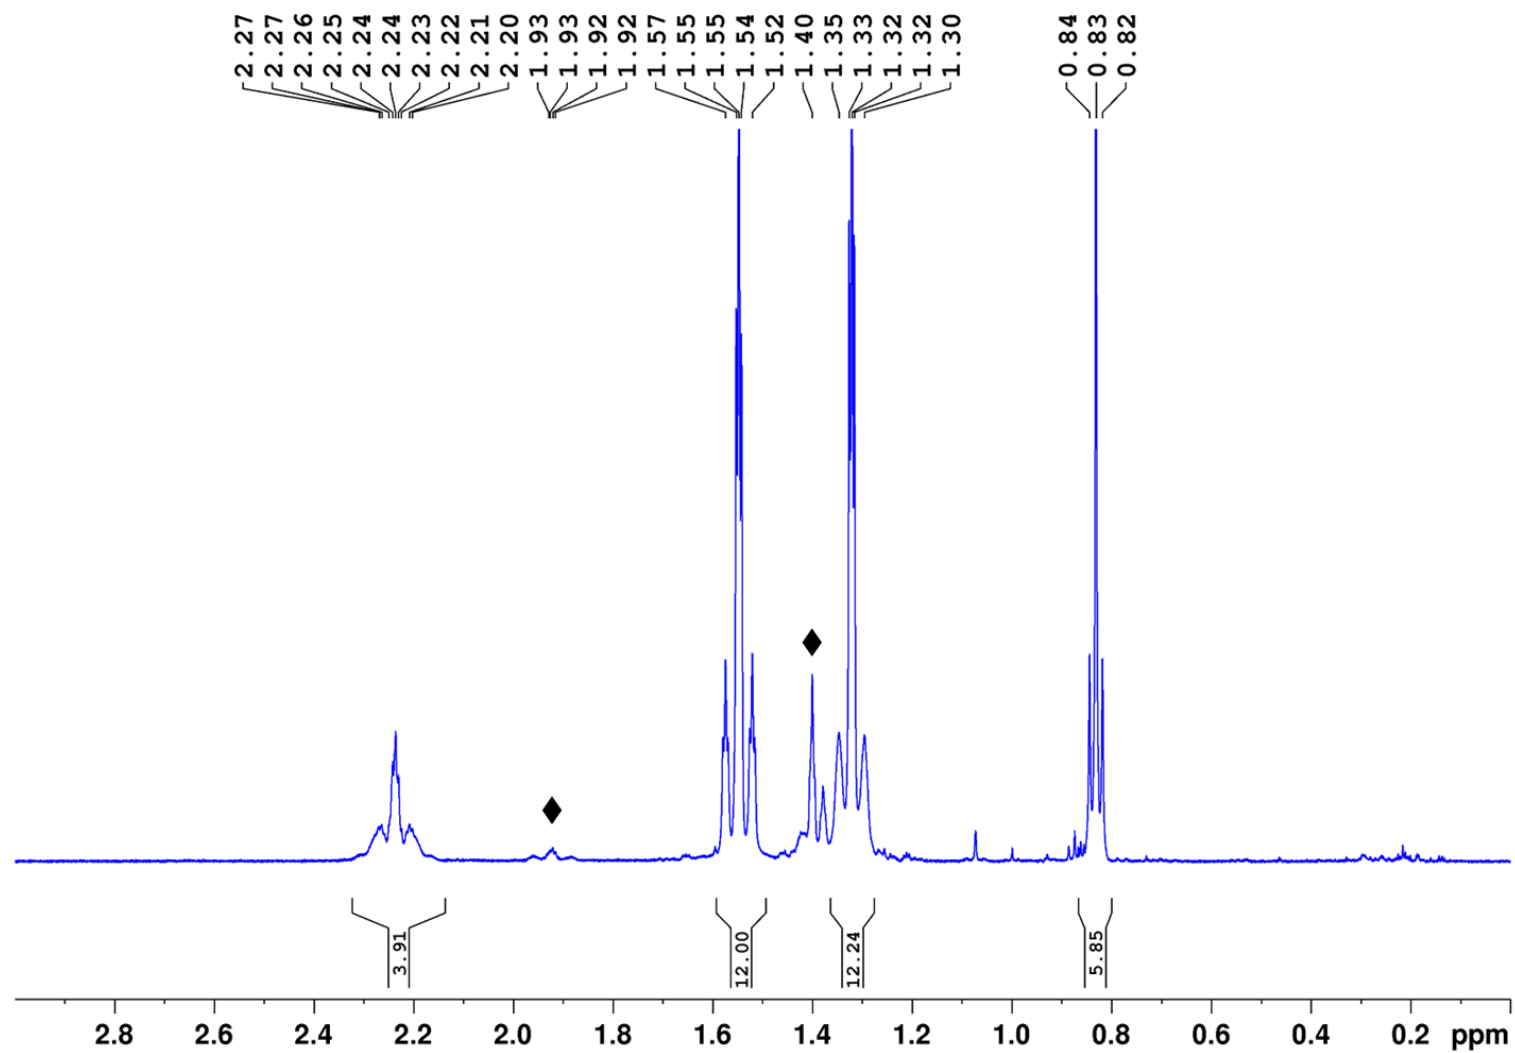

**Figure S34.**  $^1\text{H}$  NMR spectrum of  $3^{\text{SiMe}_2\text{Cl}}\text{-Cl}$  in  $\text{C}_6\text{D}_6$ . The additional resonances marked  $\blacklozenge$  correspond to the decomposition product  $[(\mu\text{-dmpm})_2\text{Pt}_2\text{Cl}_2]$ .

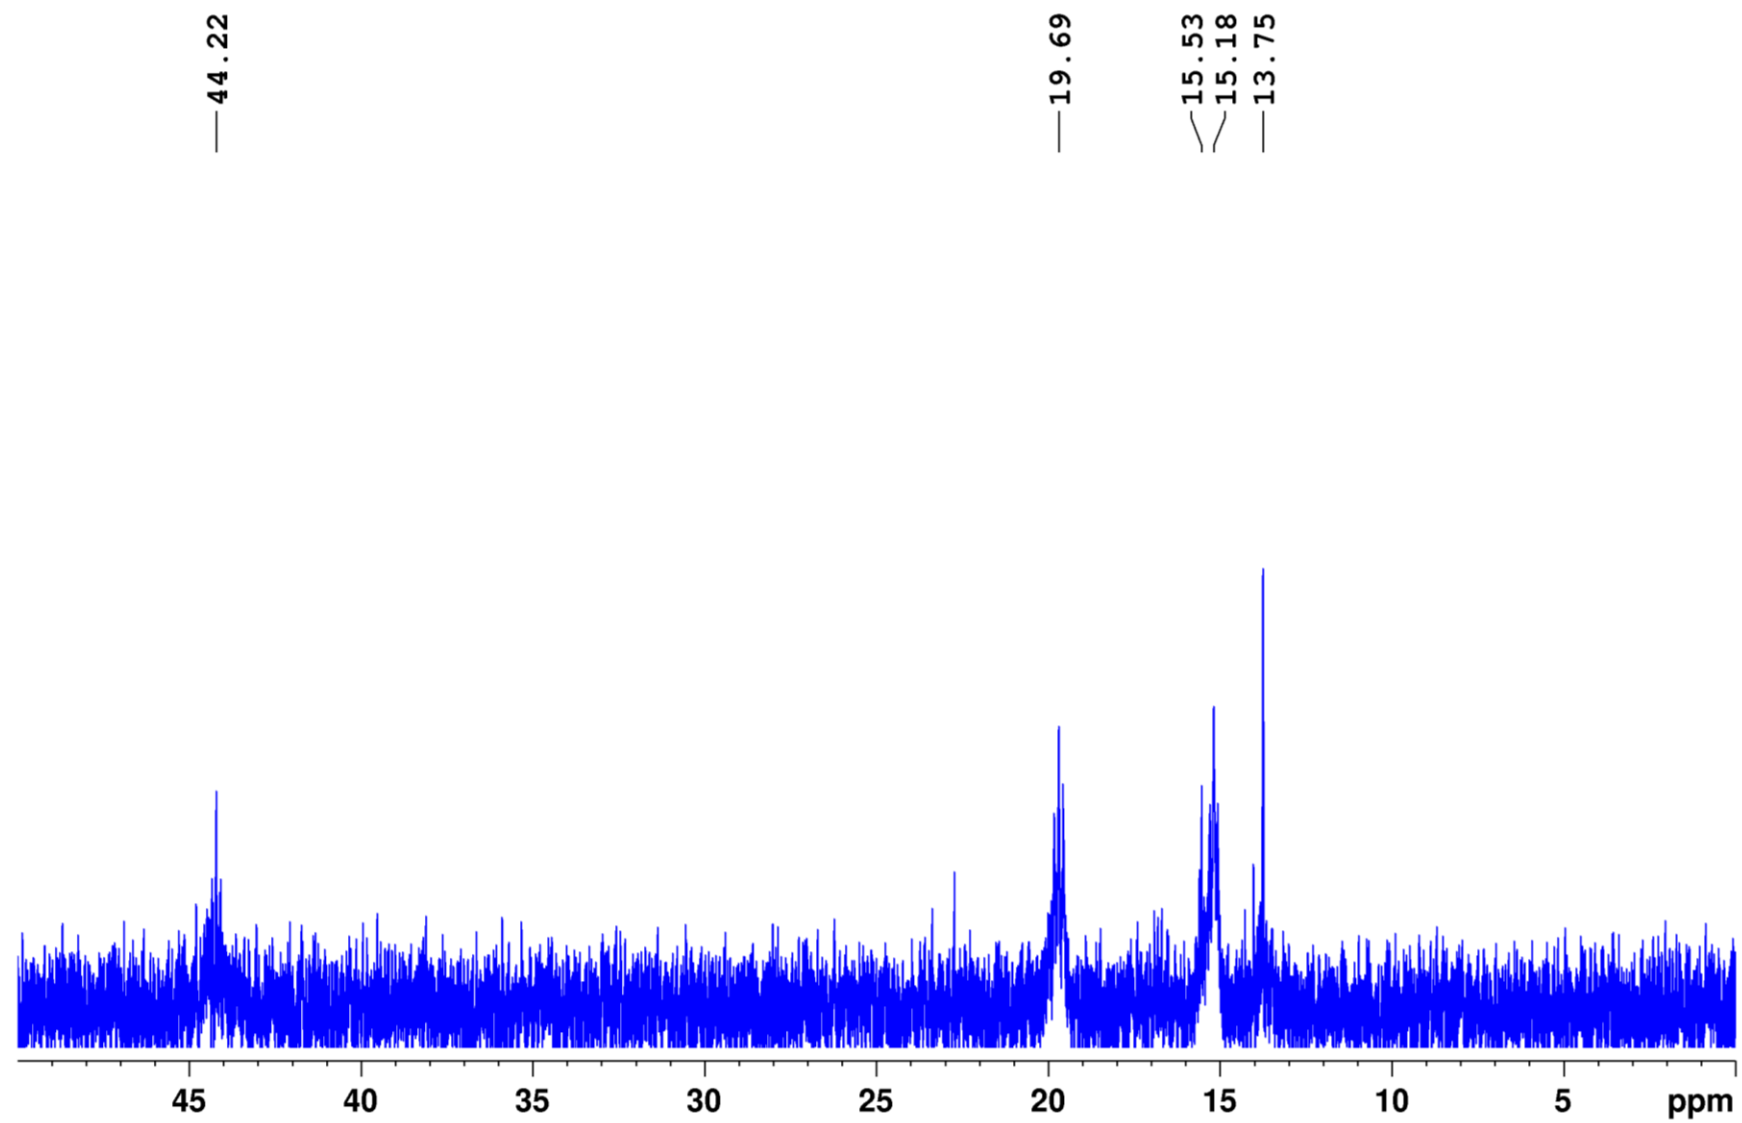

Figure S35.  $^{13}\text{C}\{^1\text{H}\}$  NMR spectrum of  $3^{\text{SiMe}_2\text{Cl}}\text{-Cl}$  in  $\text{C}_6\text{D}_6$ .

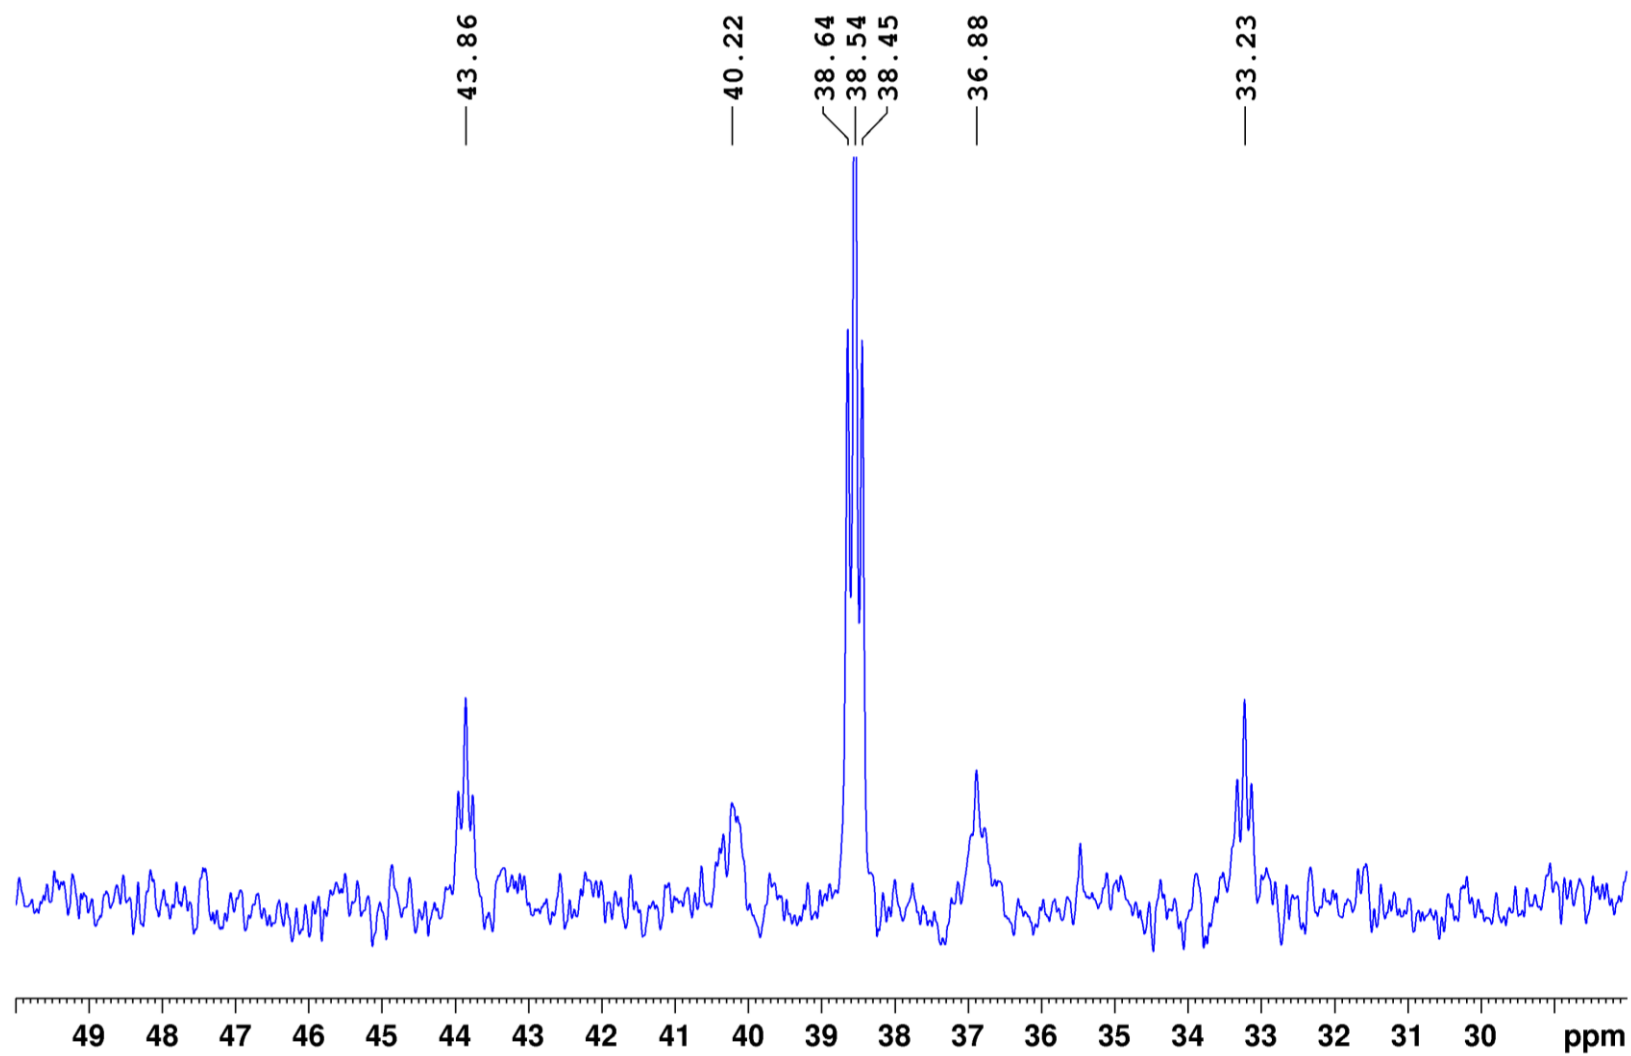

**Figure S36.**  $^{29}\text{Si}\{^1\text{H}\}$  NMR spectrum of  $3^{\text{SiMe}_2\text{Cl}}\text{-Cl}$  in  $\text{C}_6\text{D}_6$ .

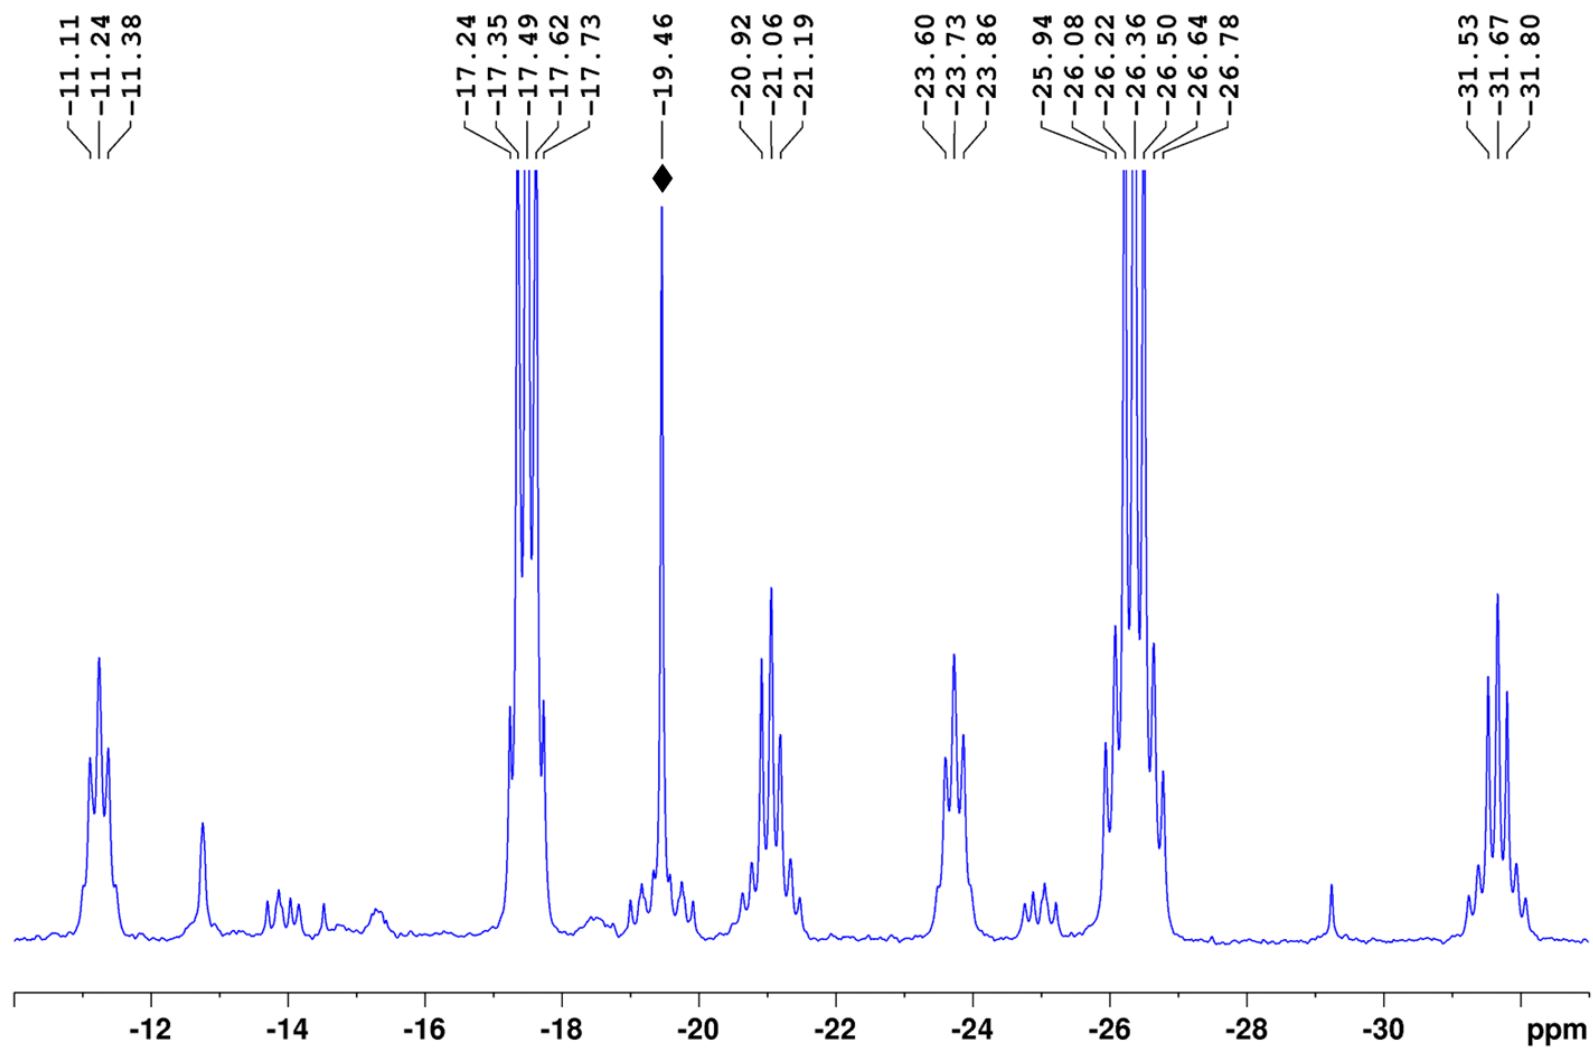

**Figure S37.**  $^{31}\text{P}\{^1\text{H}\}$  NMR spectrum of  $3^{\text{SiMe}_2\text{Cl}}\text{-Cl}$  in  $\text{C}_6\text{D}_6$ . The additional resonance marked  $\blacklozenge$  corresponds to the decomposition product  $[(\mu\text{-dmpm})_2\text{Pt}_2\text{Cl}_2]$  (ca. 9%).

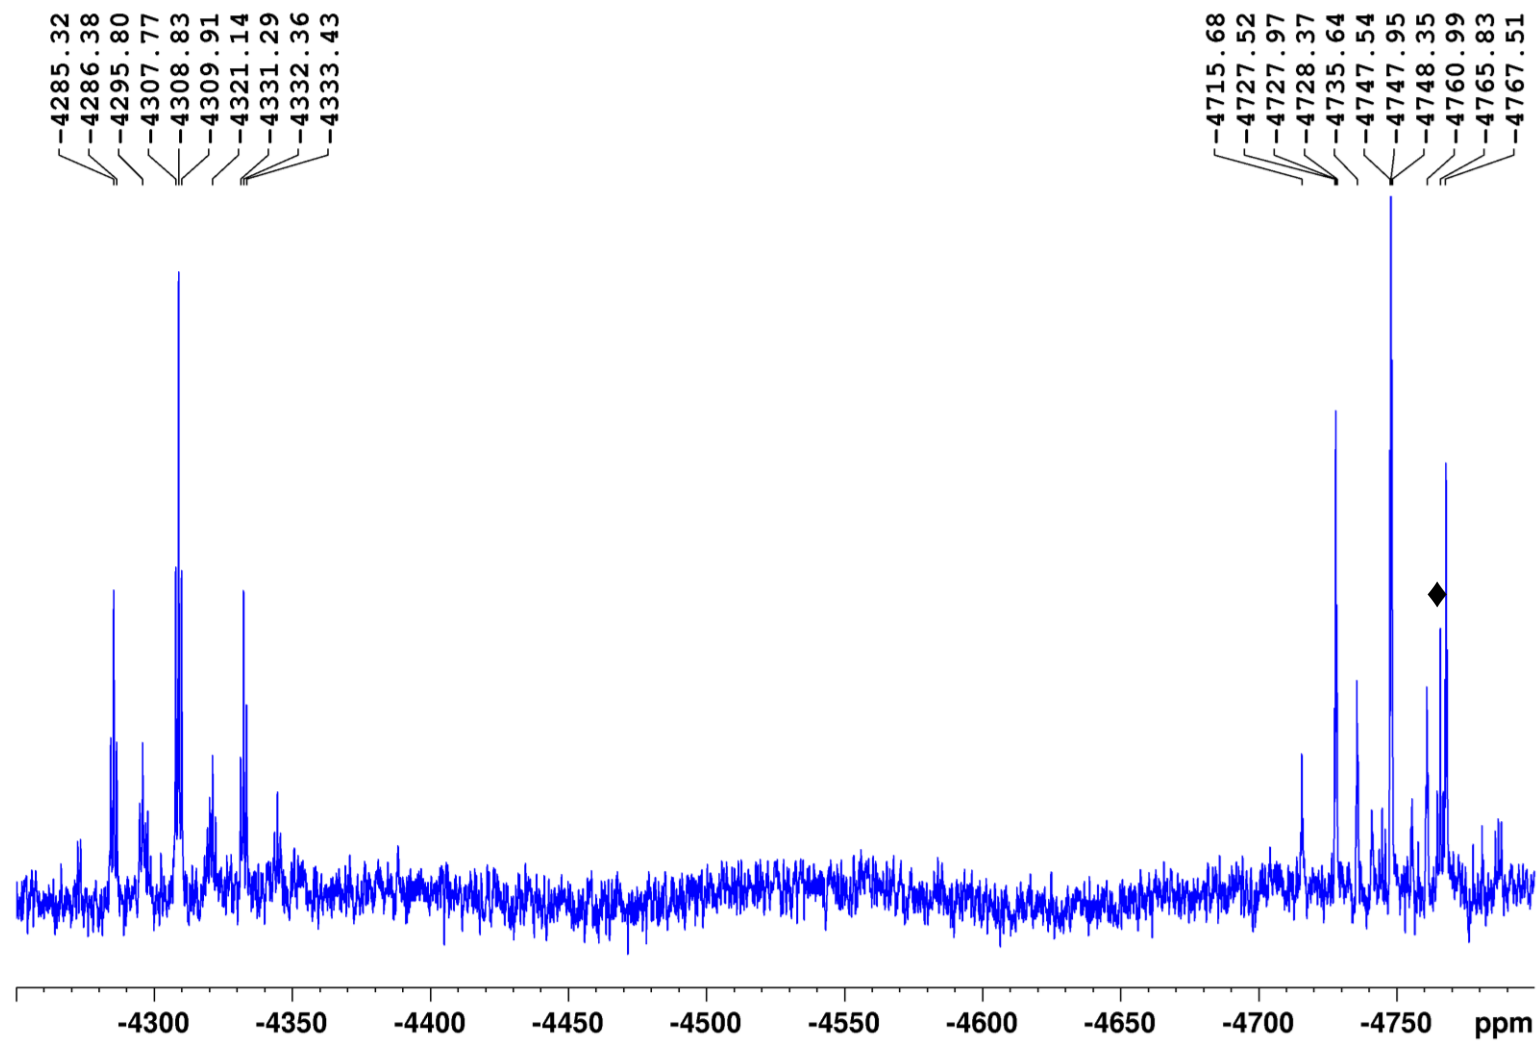

**Figure S38.**  $^{195}\text{Pt}\{^1\text{H}\}$  NMR spectrum of  $3^{\text{SiMe}_2\text{Cl}}\text{-Cl}$  in  $\text{C}_6\text{D}_6$ . The additional resonance marked  $\blacklozenge$  corresponds to the decomposition product  $[(\mu\text{-dmpm})_2\text{Pt}_2\text{Cl}_2]$ . The additional resonance marked  $\blacklozenge$  correspond to the decomposition product  $[(\mu\text{-dmpm})_2\text{Pt}_2\text{Cl}_2]$ .

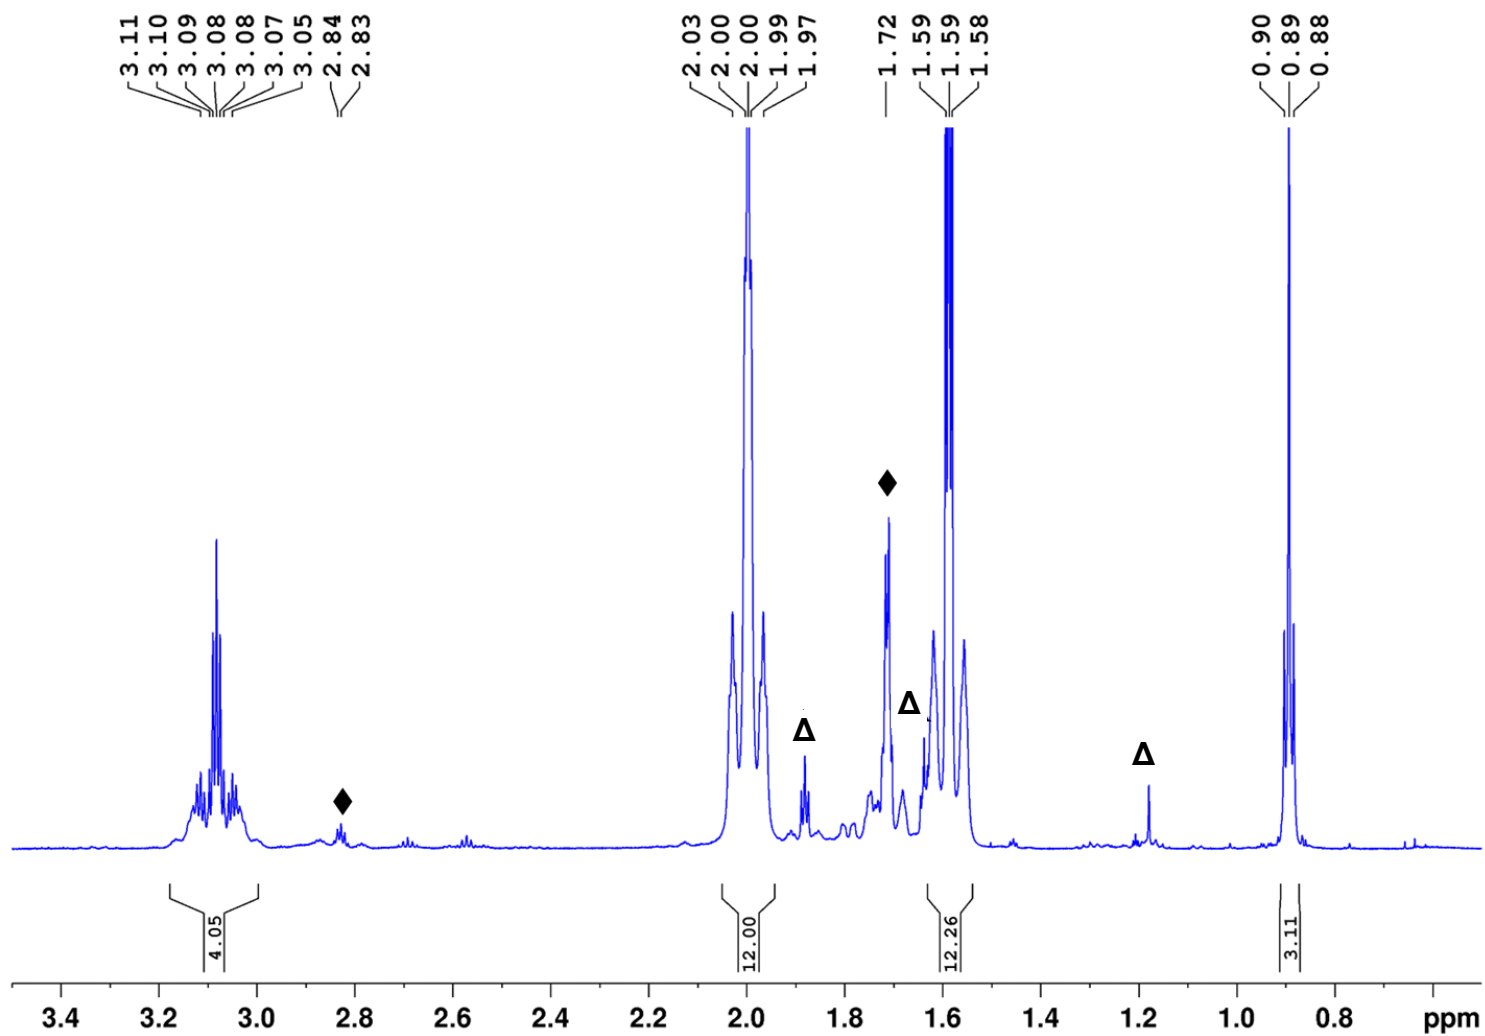

**Figure S39.**  $^1\text{H}$  NMR spectrum of  $3^{\text{SiMeCl}_2}\text{-Cl}$  in  $\text{CD}_2\text{Cl}_2$ . The additional resonances marked  $\blacklozenge$  correspond to the decomposition product  $[(\mu\text{-dmpm})_2\text{Pt}_2\text{Cl}_2]$ , those marked  $\Delta$  to the HCl hydrolysis complex  $4^{\text{SiMeCl}_2}\text{-HCl}$ .

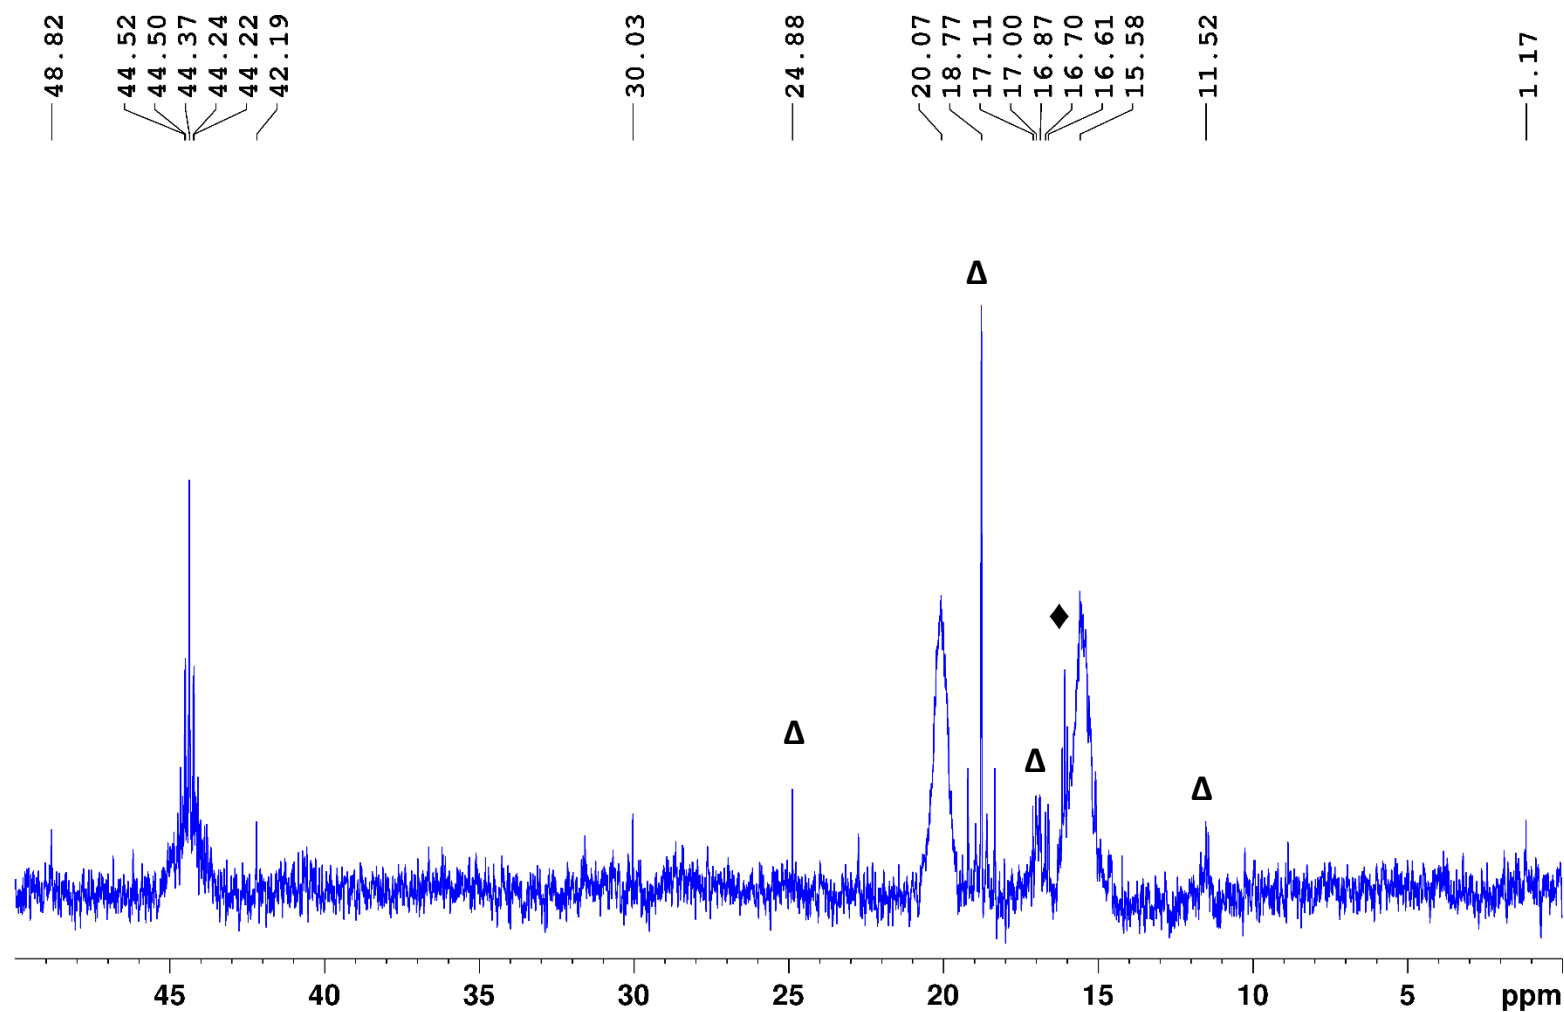

**Figure S40.**  $^{13}\text{C}\{^1\text{H}\}$  NMR spectrum of  $3^{\text{SiMeCl}_2}\text{-Cl}$  in  $\text{CD}_2\text{Cl}_2$ . The additional resonances marked  $\blacklozenge$  correspond to the decomposition product  $[(\mu\text{-dmpm})_2\text{Pt}_2\text{Cl}_2]$ , those marked  $\Delta$  to the HCl hydrolysis complex  $4^{\text{SiMeCl}_2}\text{-HCl}$ .

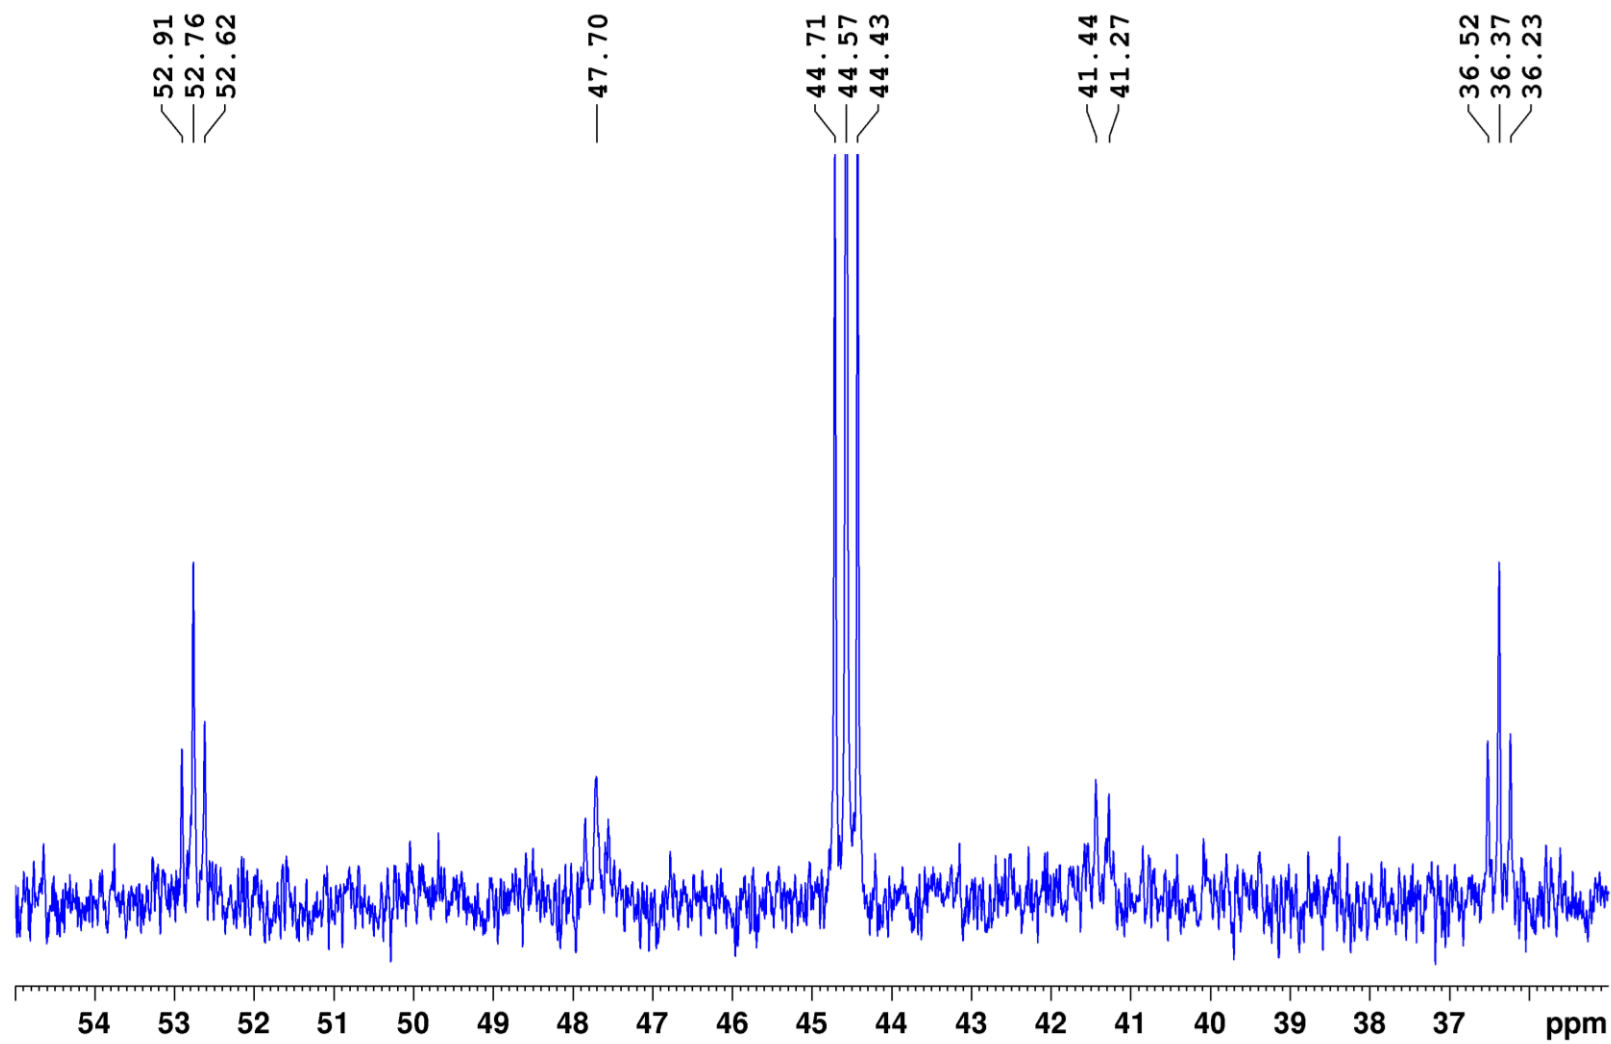

**Figure S41.**  $^{29}\text{Si}\{^1\text{H}\}$  NMR spectrum of  $3\text{SiMeCl}_2\text{-Cl}$  in  $\text{CD}_2\text{Cl}_2$ .

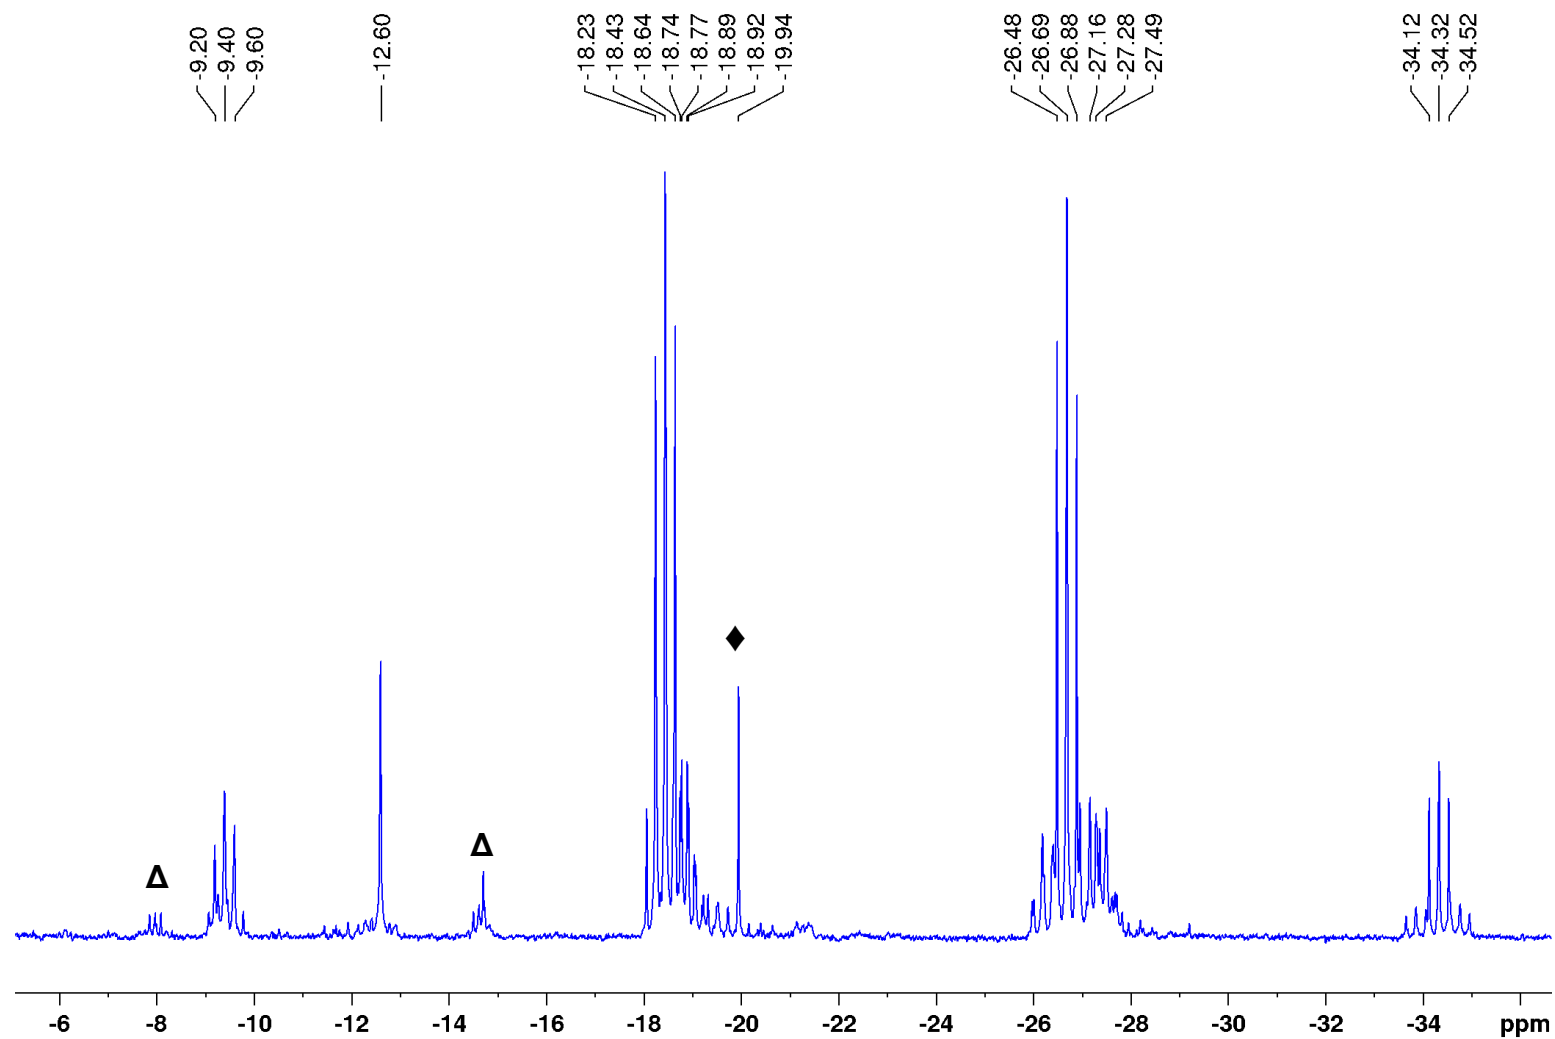

**Figure S42.**  $^{31}\text{P}\{^1\text{H}\}$  NMR spectrum of  $3^{\text{SiMeCl}_2}\text{-Cl}$  in  $\text{CD}_2\text{Cl}_2$ . The additional resonances marked  $\blacklozenge$  correspond to the decomposition product  $[(\mu\text{-dmpm})_2\text{Pt}_2\text{Cl}_2]$  (ca. 2%), those marked  $\Delta$  to the HCl hydrolysis complex  $4^{\text{SiMeCl}_2}\text{-HCl}$  (ca. 2%).

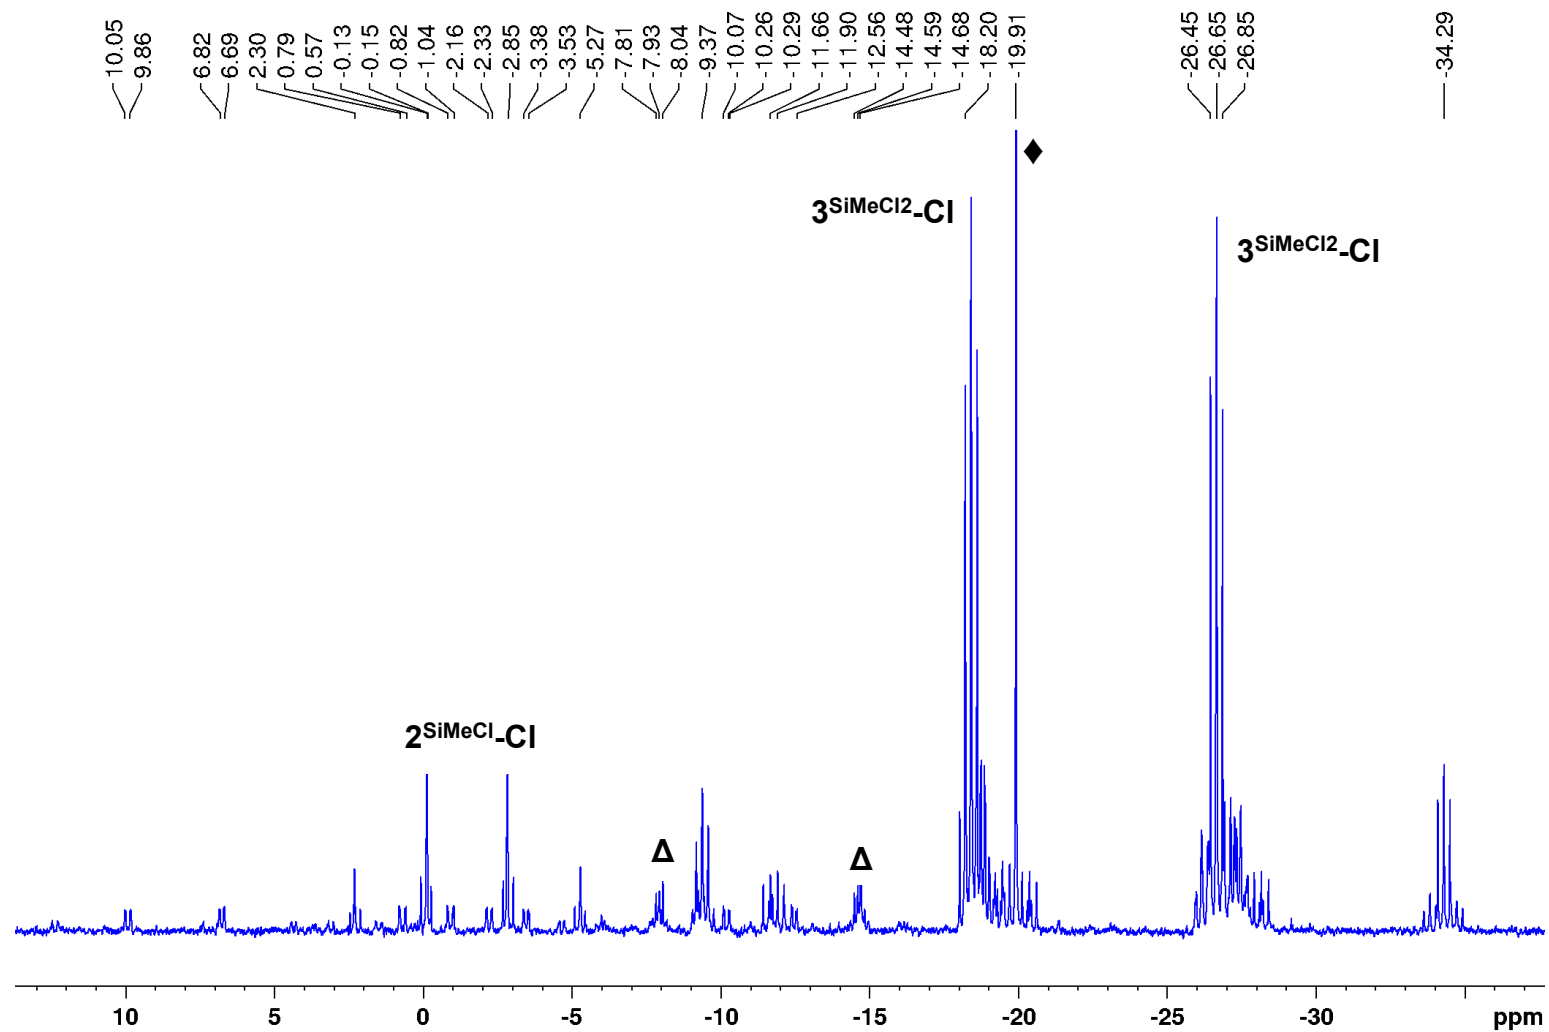

**Figure S43.**  $^{31}\text{P}\{^1\text{H}\}$  NMR spectrum after 2 days of heating  $3^{\text{SiMeCl}_2\text{-Cl}}$  at  $60\text{ }^\circ\text{C}$  in  $\text{CD}_2\text{Cl}_2$ , showing the formation of  $2^{\text{SiMeCl-Cl}}$  (ca. 16%). The additional resonances marked  $\blacklozenge$  correspond to the decomposition product  $[(\mu\text{-dmpm})_2\text{Pt}_2\text{Cl}_2]$  (ca. 17%), those marked  $\Delta$  to the HCl hydrolysis complex  $4^{\text{SiMeCl}_2\text{-HCl}}$  (ca. 4%).

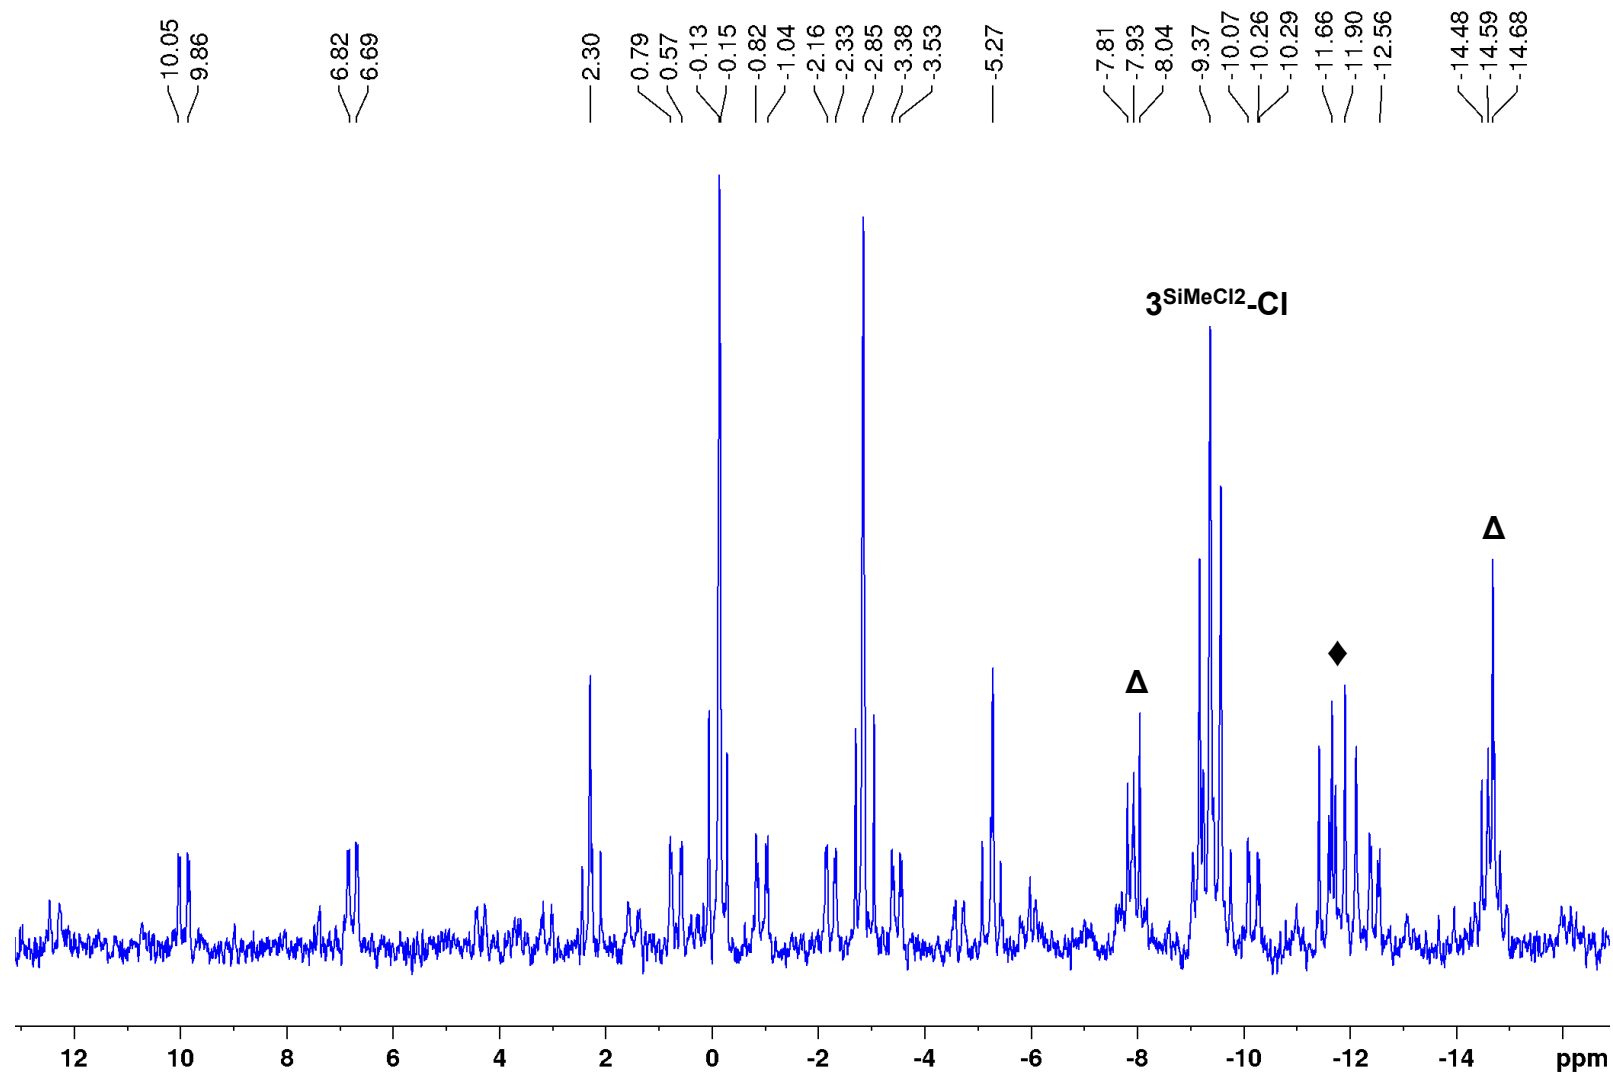

**Figure S44.** Expansion of the  $^{31}\text{P}\{^1\text{H}\}$  NMR resonances of  $2^{\text{SiMeCl}_2}\text{-Cl}$ . The additional resonances marked  $\blacklozenge$  correspond to the decomposition product  $[(\mu\text{-dmpm})_2\text{Pt}_2\text{Cl}_2]$ , those marked  $\Delta$  to the HCl hydrolysis complex  $4^{\text{SiMeCl}_2}\text{-HCl}$  (ca. 4%).

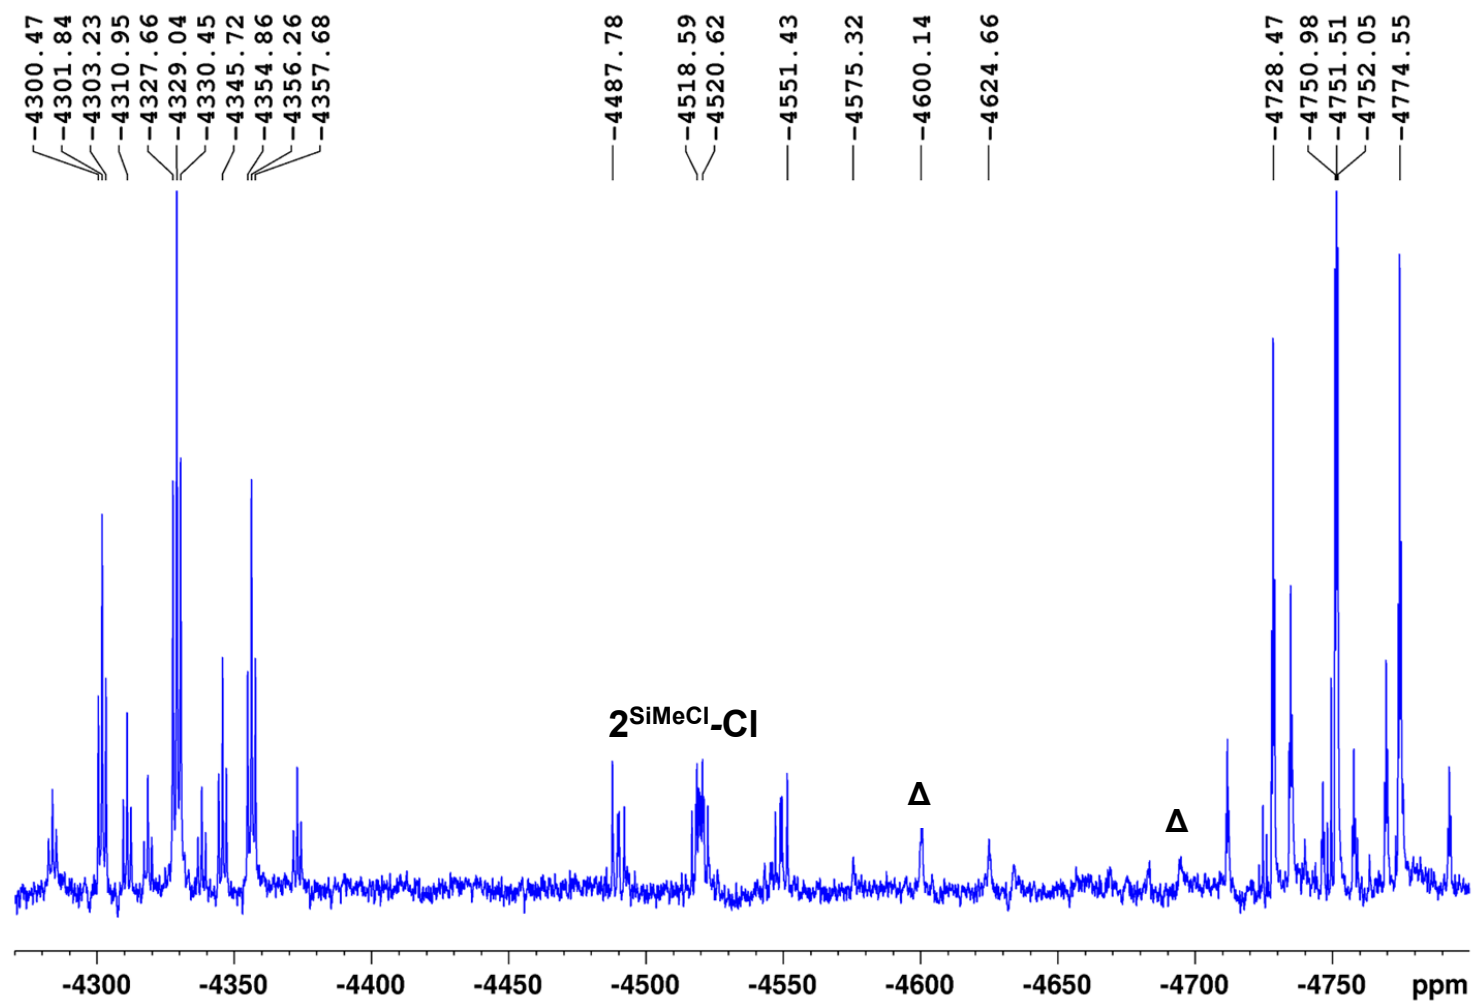

**Figure S45.**  $^{195}\text{Pt}\{^1\text{H}\}$  NMR spectrum of  $3^{\text{SiMeCl}_2}\text{-Cl}$  in  $\text{CD}_2\text{Cl}_2$ . The additional resonance marked  $\Delta$  correspond to the HCl hydrolysis complex  $4^{\text{SiMeCl}_2}\text{-HCl}$ .

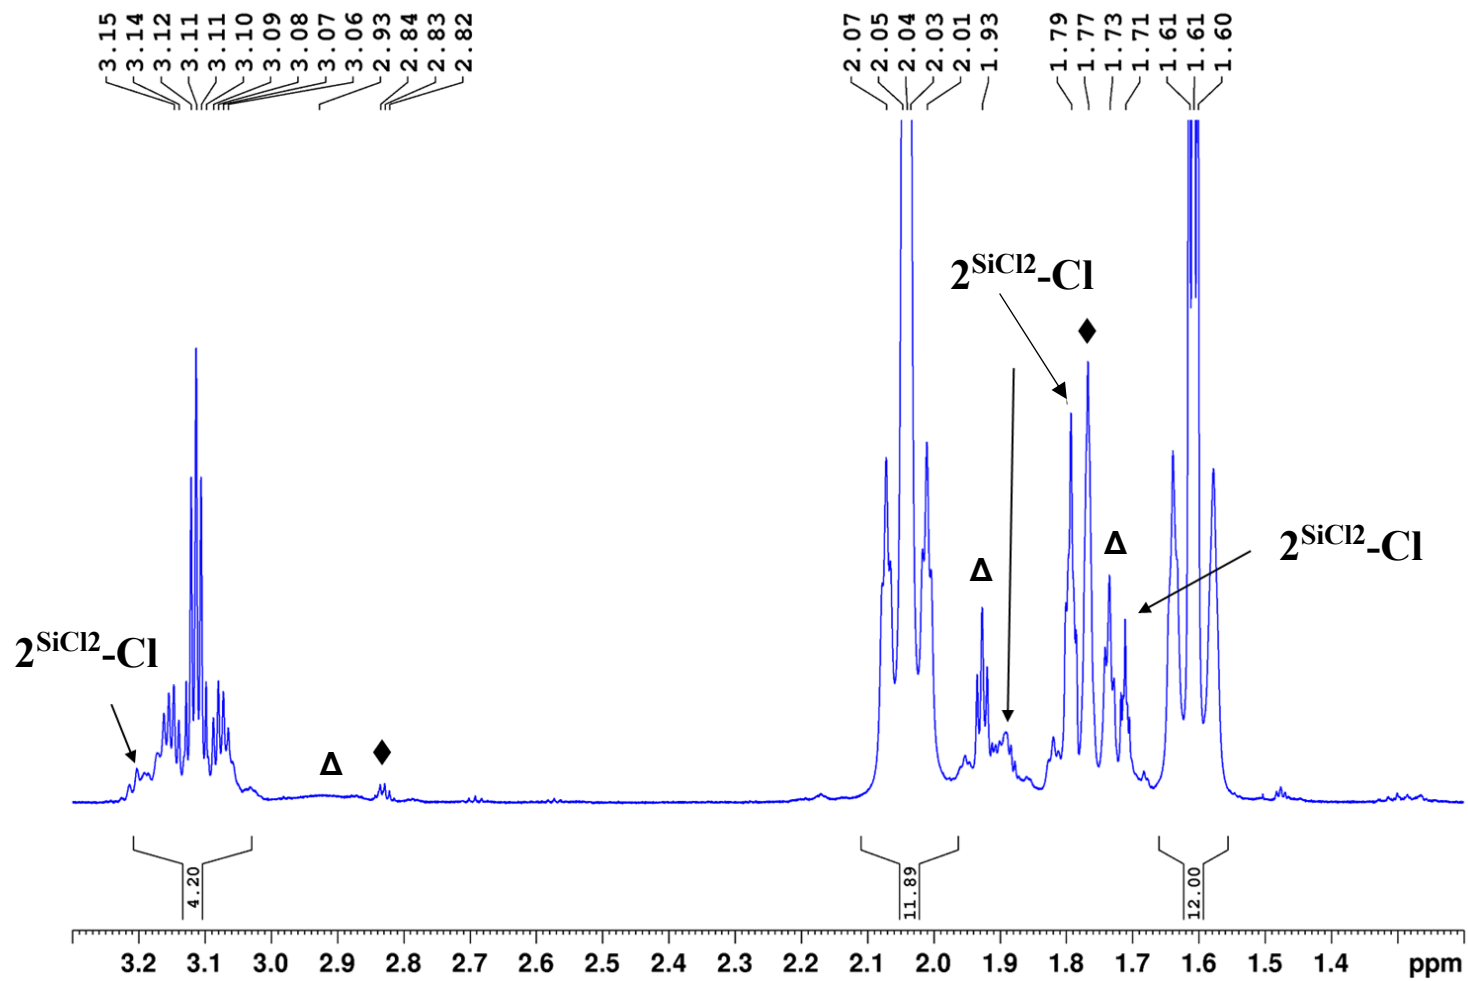

**Figure S46.**  $^1\text{H}$  NMR spectrum of  $3^{\text{SiCl}_3}\text{-Cl}$  in  $\text{CD}_2\text{Cl}_2$ , already showing rearrangement to  $2^{\text{SiCl}_2}\text{-Cl}$ . The additional resonances marked  $\blacklozenge$  correspond to the decomposition product  $[(\mu\text{-dmpm})_2\text{Pt}_2\text{Cl}_2]$ , those marked  $\Delta$  to the HCl hydrolysis complex  $4^{\text{SiCl}_3}\text{-HCl}$ .

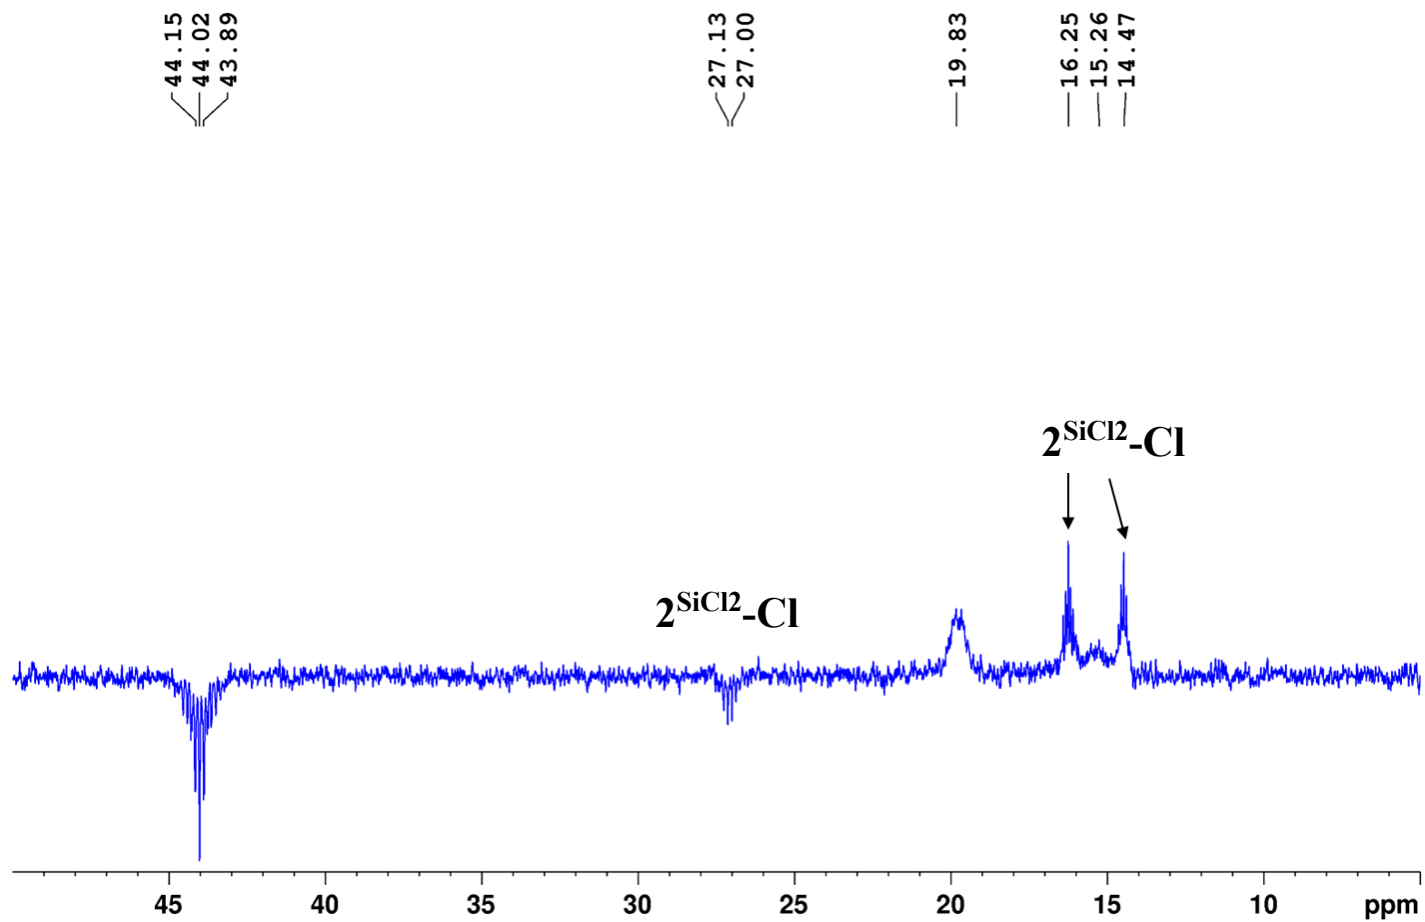

Figure S47. DEPT135- $^{13}\text{C}\{^1\text{H}\}$  NMR spectrum of  $3^{\text{SiCl}_3}\text{-Cl}$  and its rearrangement product  $2^{\text{SiCl}_2}\text{-Cl}$  in  $\text{CD}_2\text{Cl}_2$ .

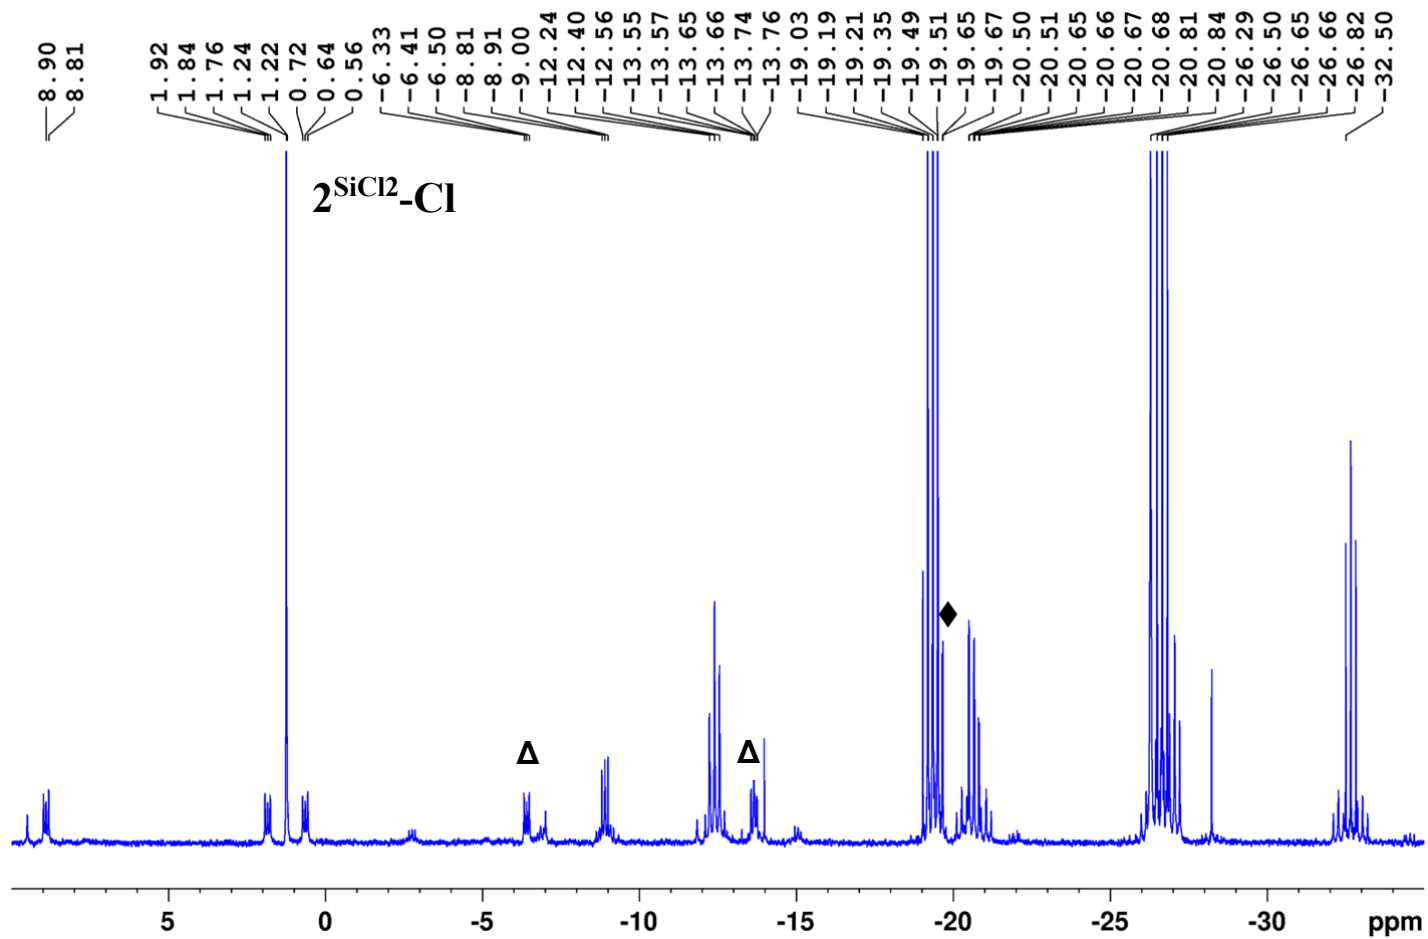

**Figure S48.**  $^{31}\text{P}\{^1\text{H}\}$  NMR spectrum of  $3^{\text{SiCl}_3}\text{-Cl}$  and its rearrangement product  $2^{\text{SiCl}_2}\text{-Cl}$  in  $\text{CD}_2\text{Cl}_2$ . The additional resonances marked  $\blacklozenge$  correspond to the decomposition product  $[(\mu\text{-dmpm})_2\text{Pt}_2\text{Cl}_2]$  (ca. 1%), those marked  $\Delta$  to the HCl hydrolysis complex  $4^{\text{SiCl}_3}\text{-HCl}$  (ca. 1%).

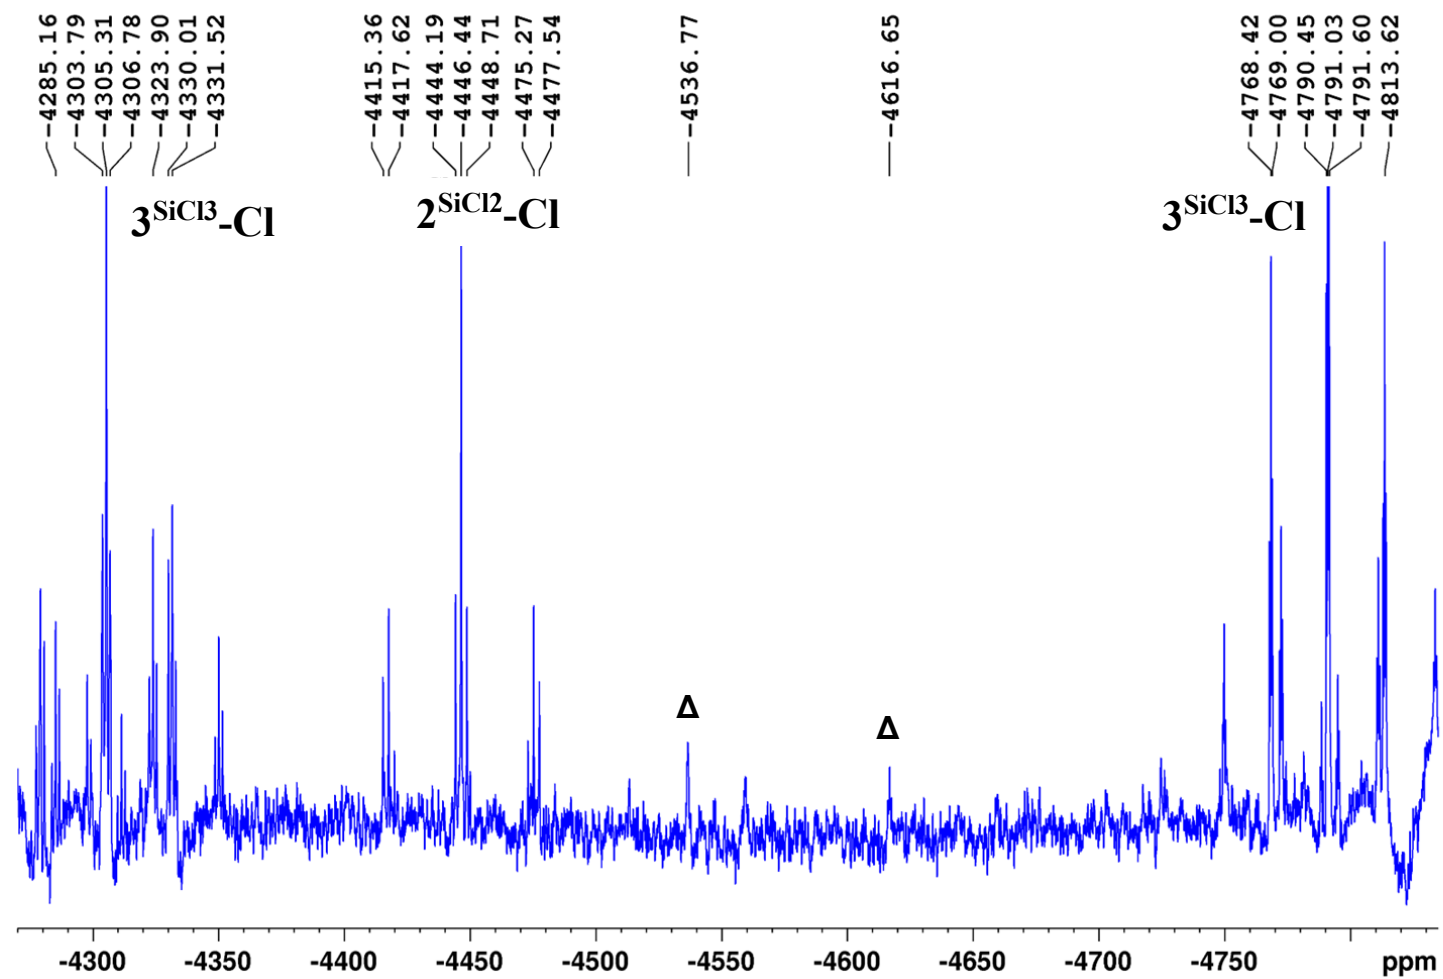

**Figure S49.**  $^{195}\text{Pt}\{^1\text{H}\}$  NMR spectrum of  $3\text{SiCl}_3\text{-Cl}$  and its rearrangement product  $2\text{SiCl}_2\text{-Cl}$  in  $\text{CD}_2\text{Cl}_2$ . The additional resonances marked  $\Delta$  correspond to the HCl hydrolysis complex  $4\text{SiCl}_3\text{-HCl}$ .

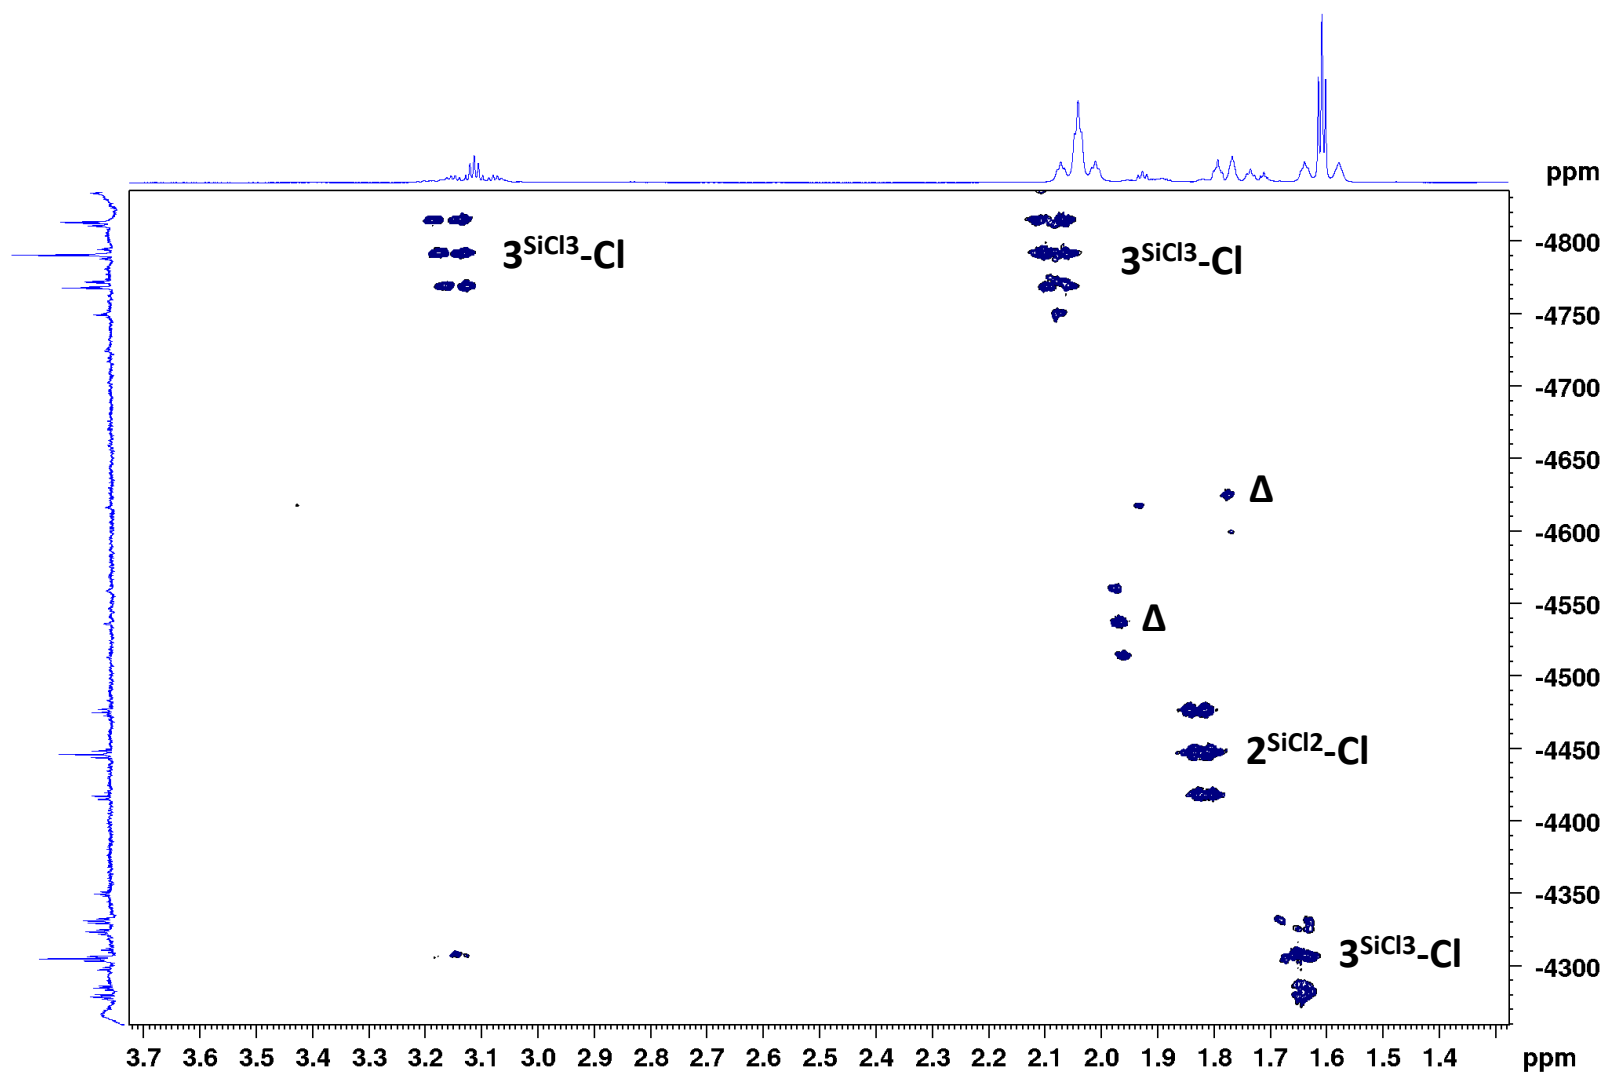

**Figure S50.**  $^1\text{H}$ - $^{195}\text{Pt}$  HMQC plot of  $3^{\text{SiCl}_3\text{-Cl}}$  and its rearrangement product  $2^{\text{SiCl}_2\text{-Cl}}$  in  $\text{CD}_2\text{Cl}_2$ . The additional resonances marked  $\Delta$  correspond to the HCl hydrolysis complex  $4^{\text{SiCl}_3\text{-HCl}}$ .

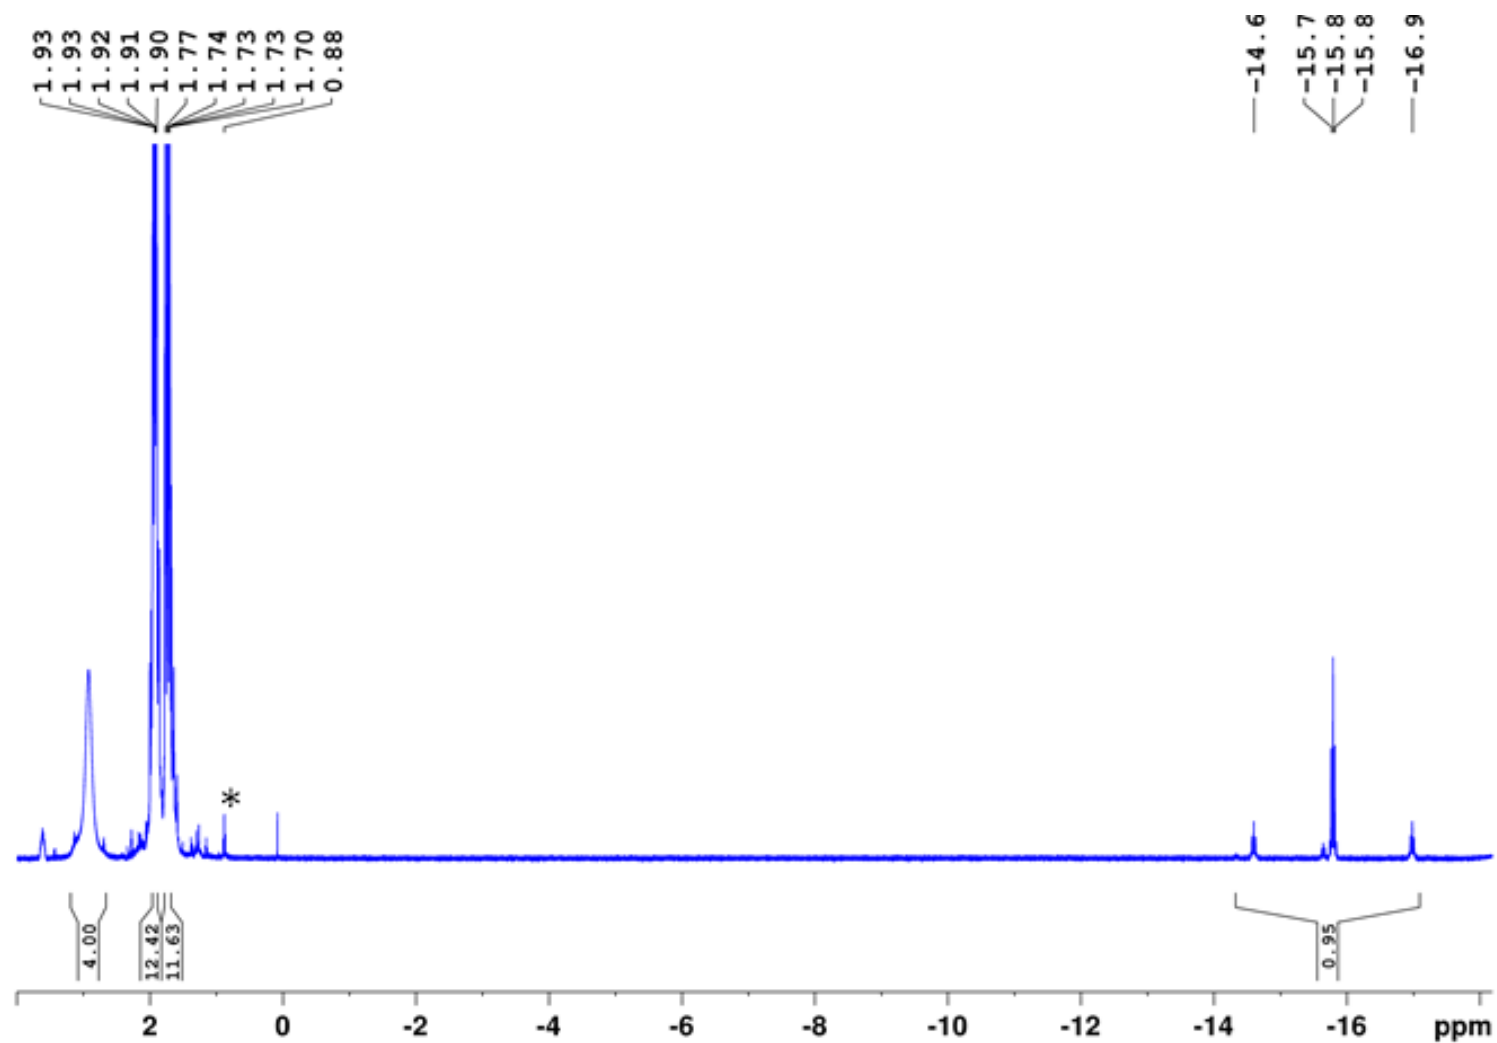

**Figure S51.**  $^1\text{H}$  NMR spectrum of  $4^{\text{SiCl}_3}\text{-HCl}$  in  $\text{CD}_2\text{Cl}_2$ . The additional resonance marked \* corresponds to residual pentane.

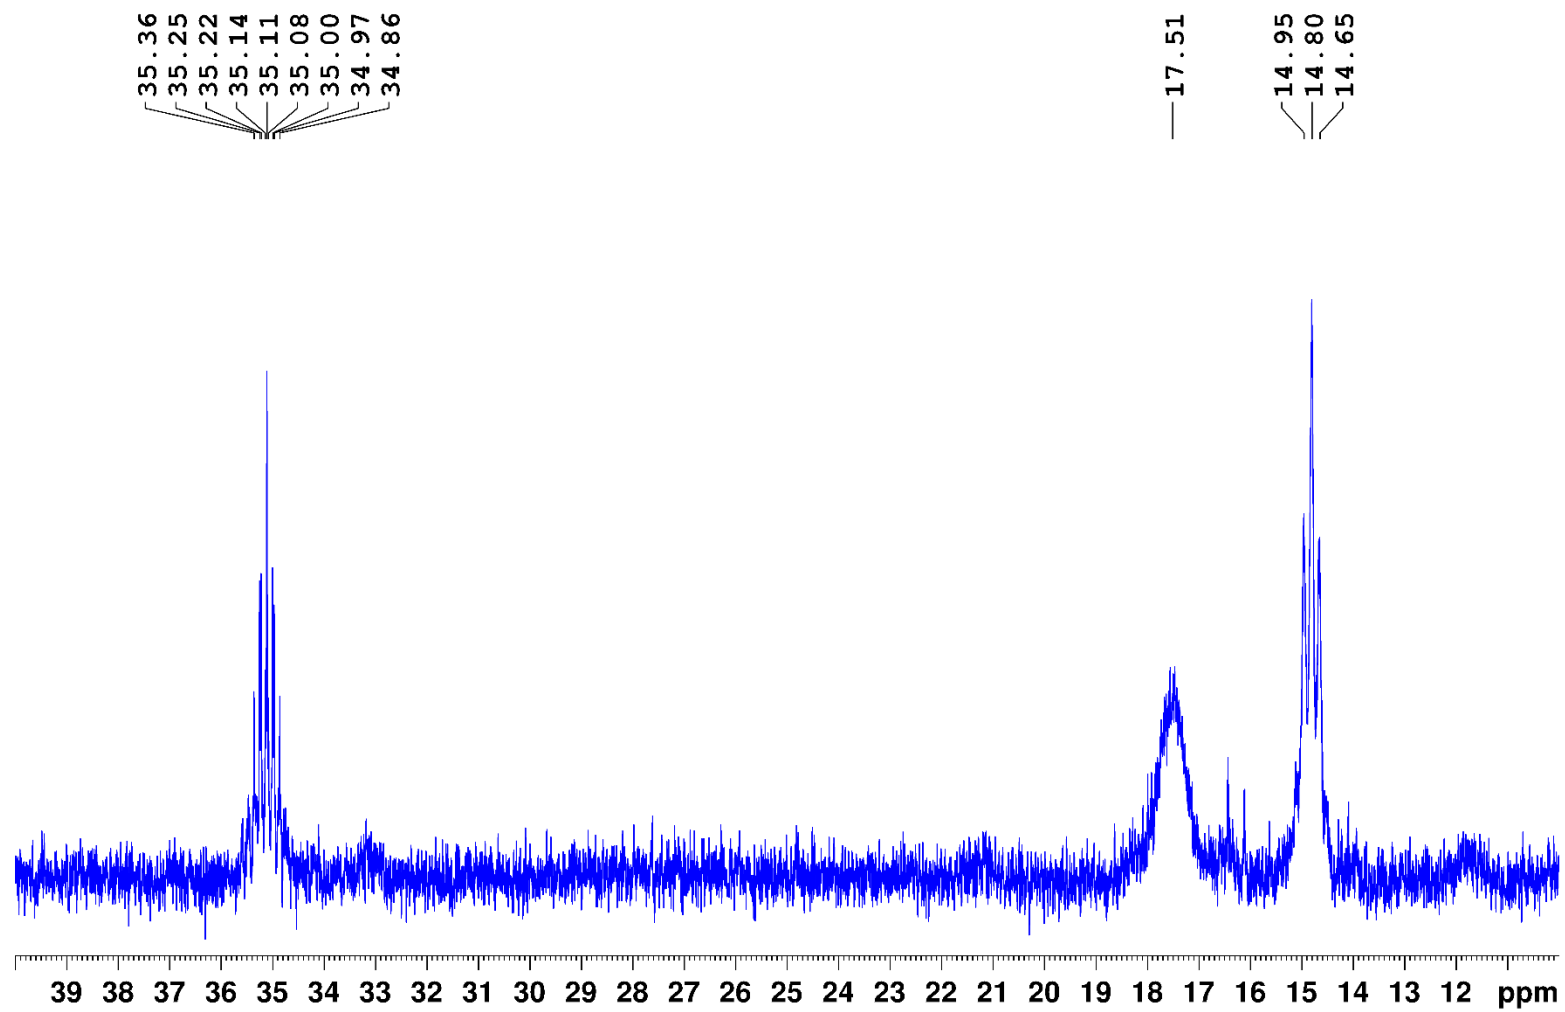

**Figure S52.**  $^{13}\text{C}\{^1\text{H}\}$  NMR spectrum of  $4^{\text{SiCl}_3}\text{-HCl}$  in  $\text{CD}_2\text{Cl}_2$ .

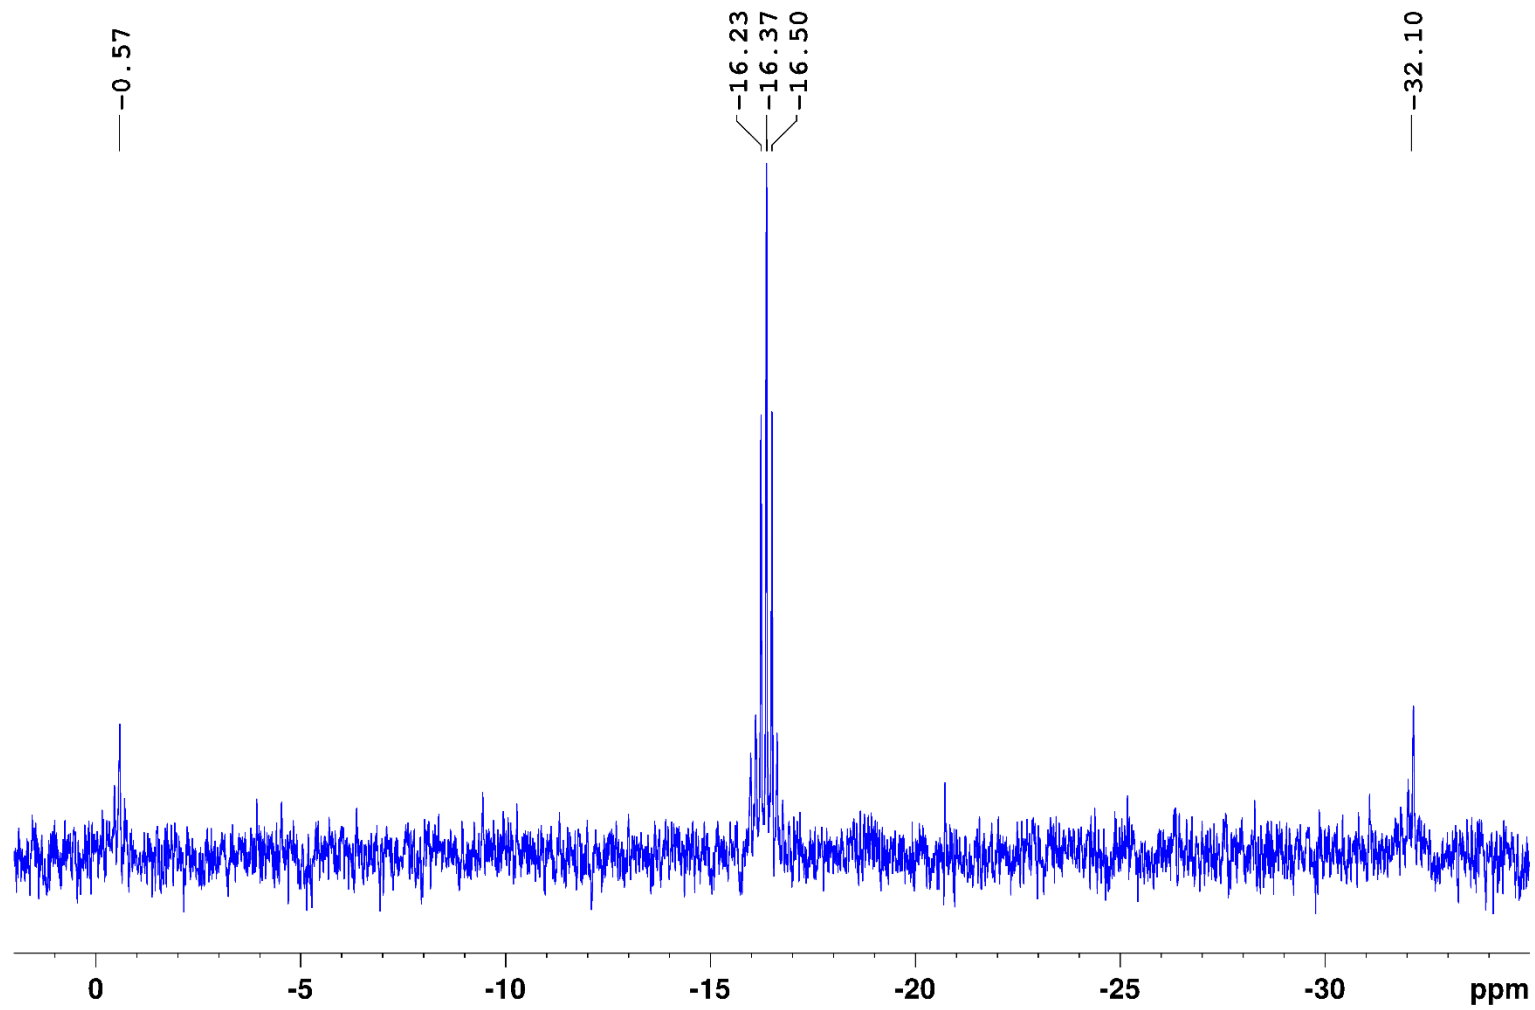

Figure S53.  $^{29}\text{Si}\{^1\text{H}\}$  NMR spectrum of  $4^{\text{SiCl}_3}\text{-HCl}$  in  $\text{CD}_2\text{Cl}_2$ .

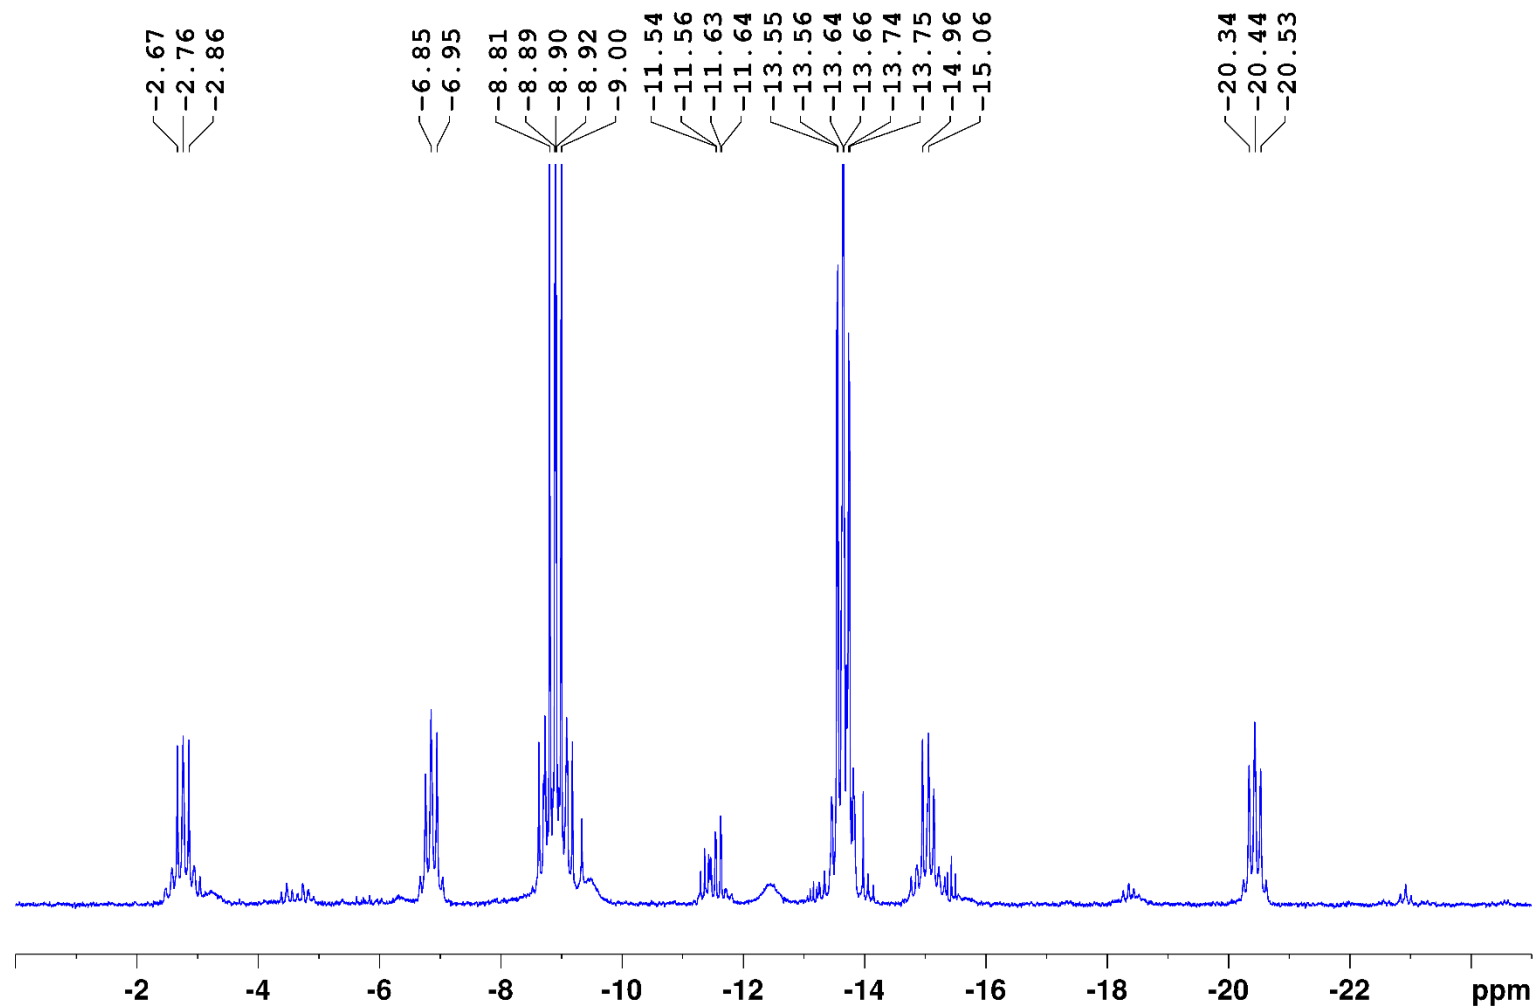

Figure S54.  $^{31}\text{P}\{^1\text{H}\}$  NMR spectrum of  $4^{\text{SiCl}_3}\text{-HCl}$  in  $\text{CD}_2\text{Cl}_2$ .

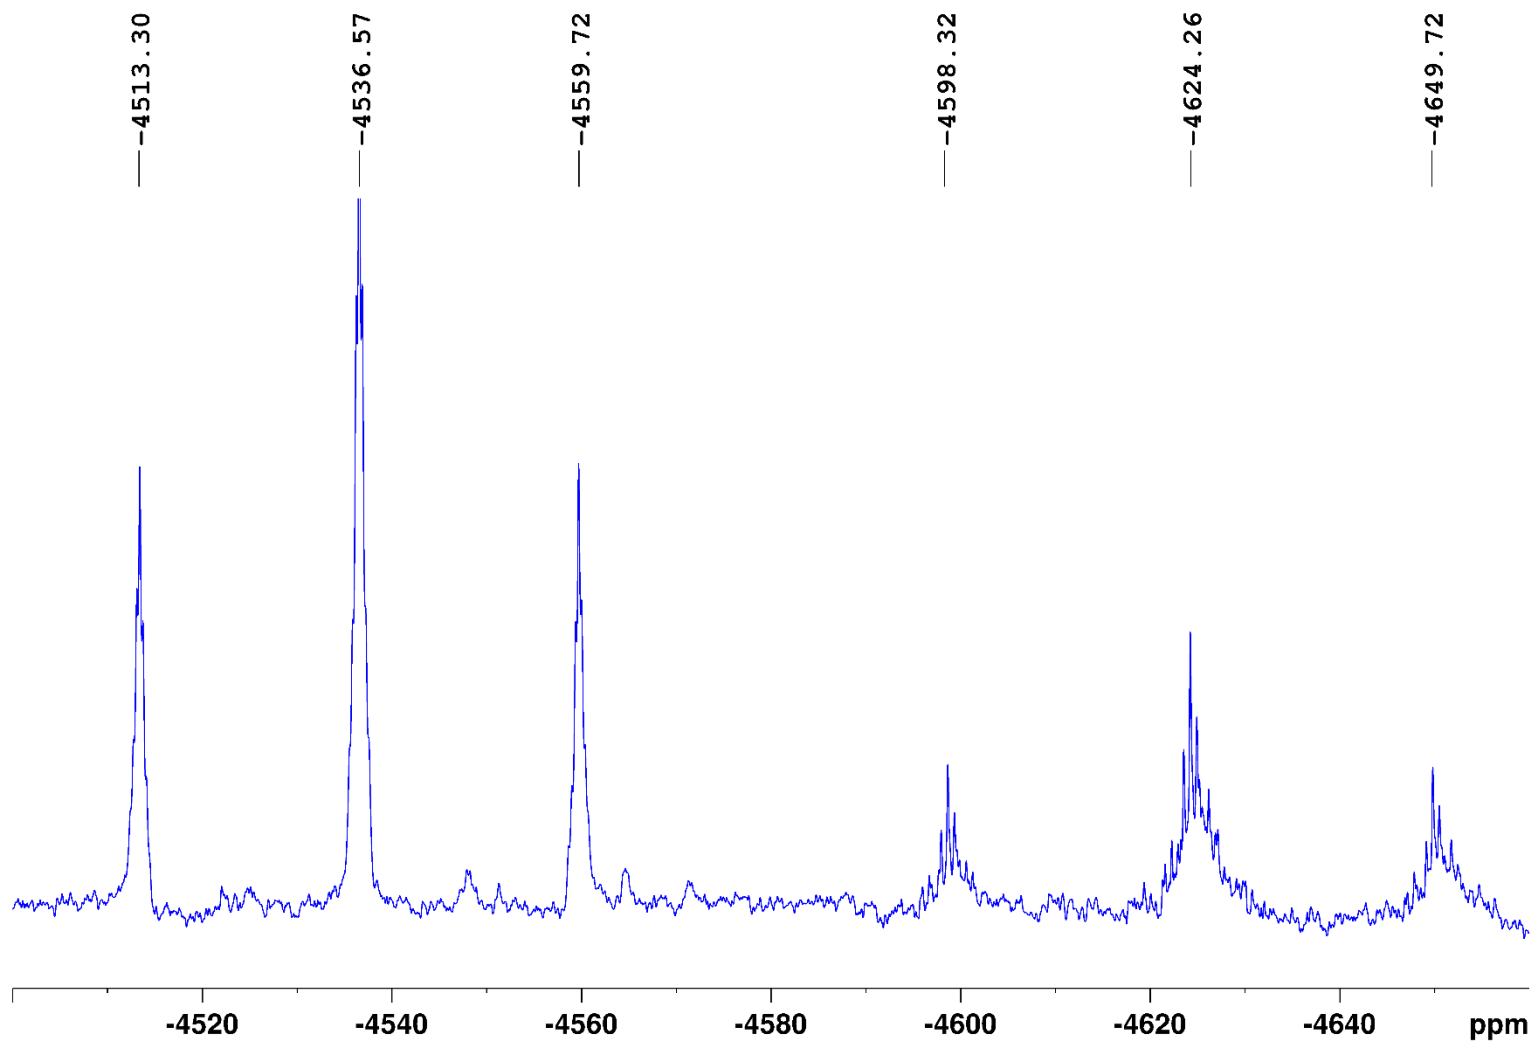

**Figure S55.**  $^{195}\text{Pt}\{^1\text{H}\}$  NMR spectrum of  $4^{\text{SiCl}_3}\text{-HCl}$  in  $\text{CD}_2\text{Cl}_2$ .

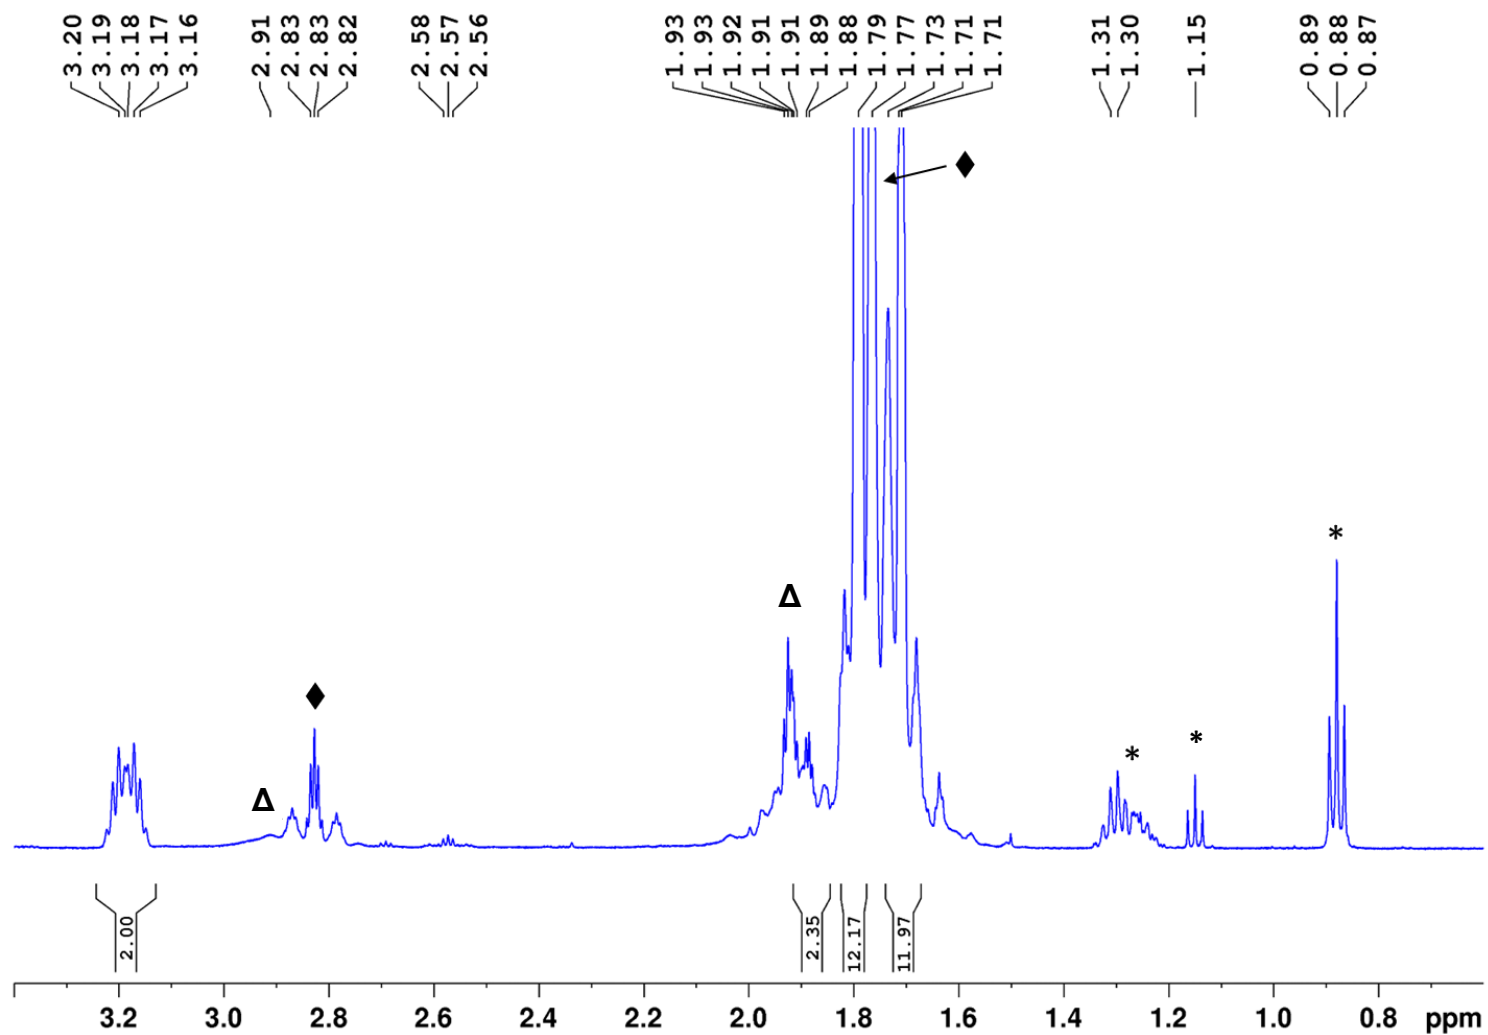

**Figure S56.**  $^1\text{H}$  NMR spectrum of  $2^{\text{SiCl}_2}\text{-Cl}$  in  $\text{CD}_2\text{Cl}_2$ . The additional resonances marked  $\blacklozenge$  correspond to the decomposition product  $[(\mu\text{-dmpm})_2\text{Pt}_2\text{Cl}_2]$ , those marked  $\Delta$  to the  $\text{HCl}$  hydrolysis complex  $4^{\text{SiCl}_3}\text{-HCl}$ , those marked  $*$  to residual pentane/hexane from recrystallisation.

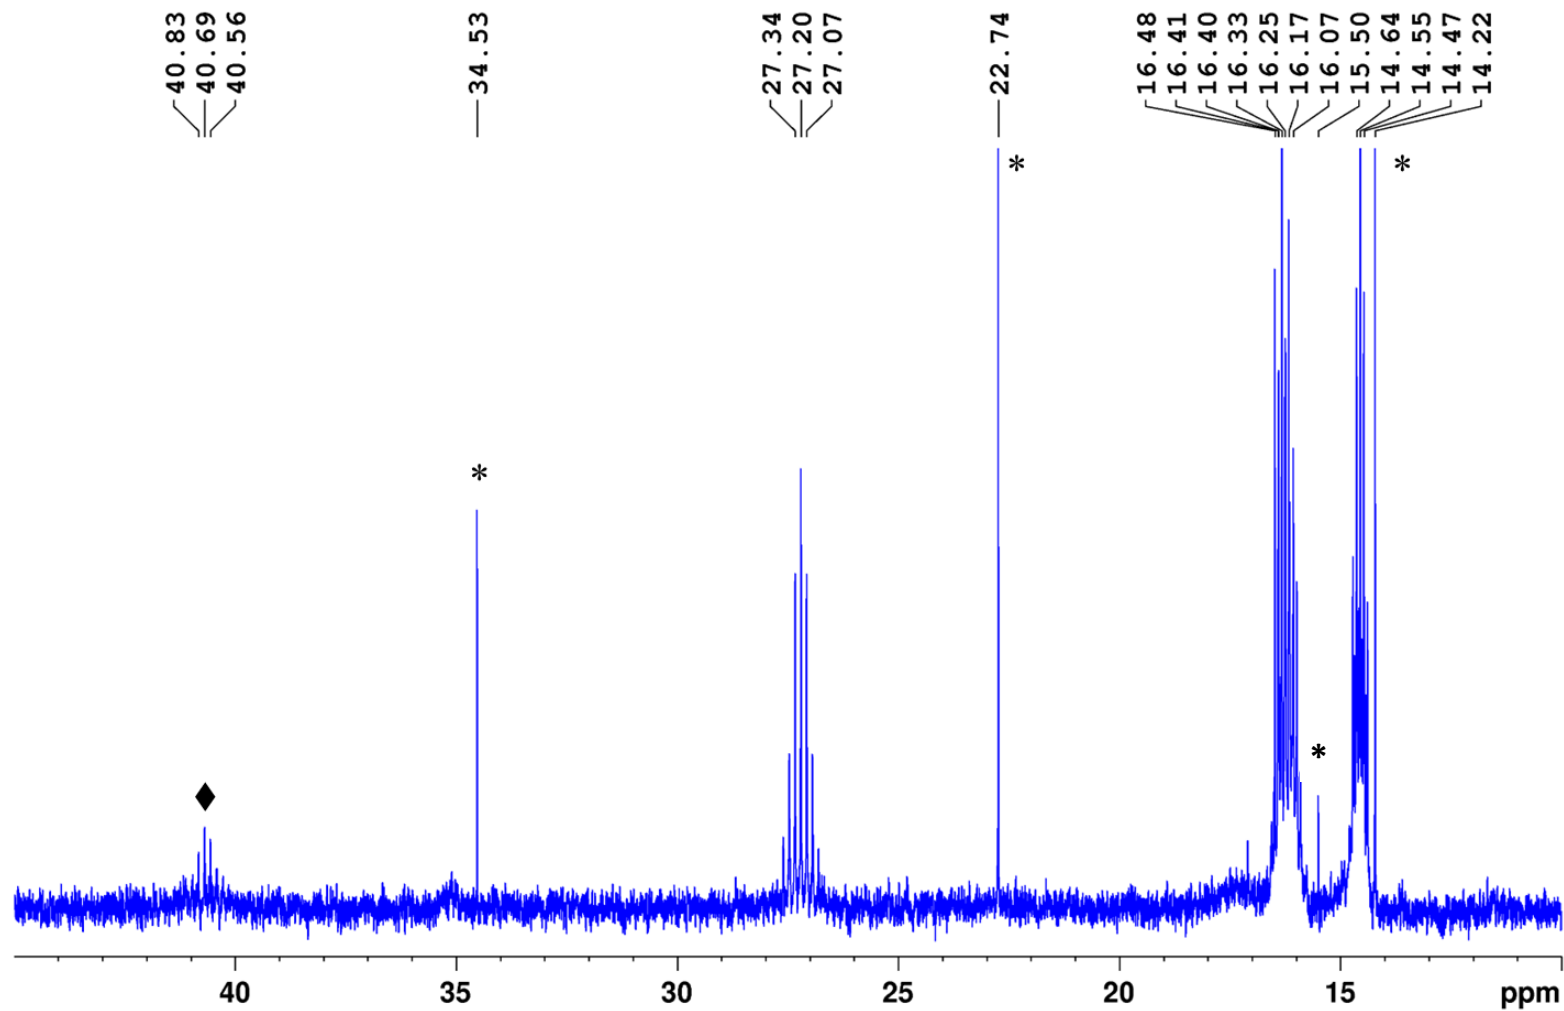

**Figure S57.**  $^{13}\text{C}\{^1\text{H}\}$  NMR spectrum of  $2^{\text{SiCl}_2}\text{-Cl}$  in  $\text{CD}_2\text{Cl}_2$ . The additional resonance marked  $\blacklozenge$  corresponds to the decomposition product  $[(\mu\text{-dmpm})_2\text{Pt}_2\text{Cl}_2]$ , those marked \* to residual pentane/hexane from recrystallisation.

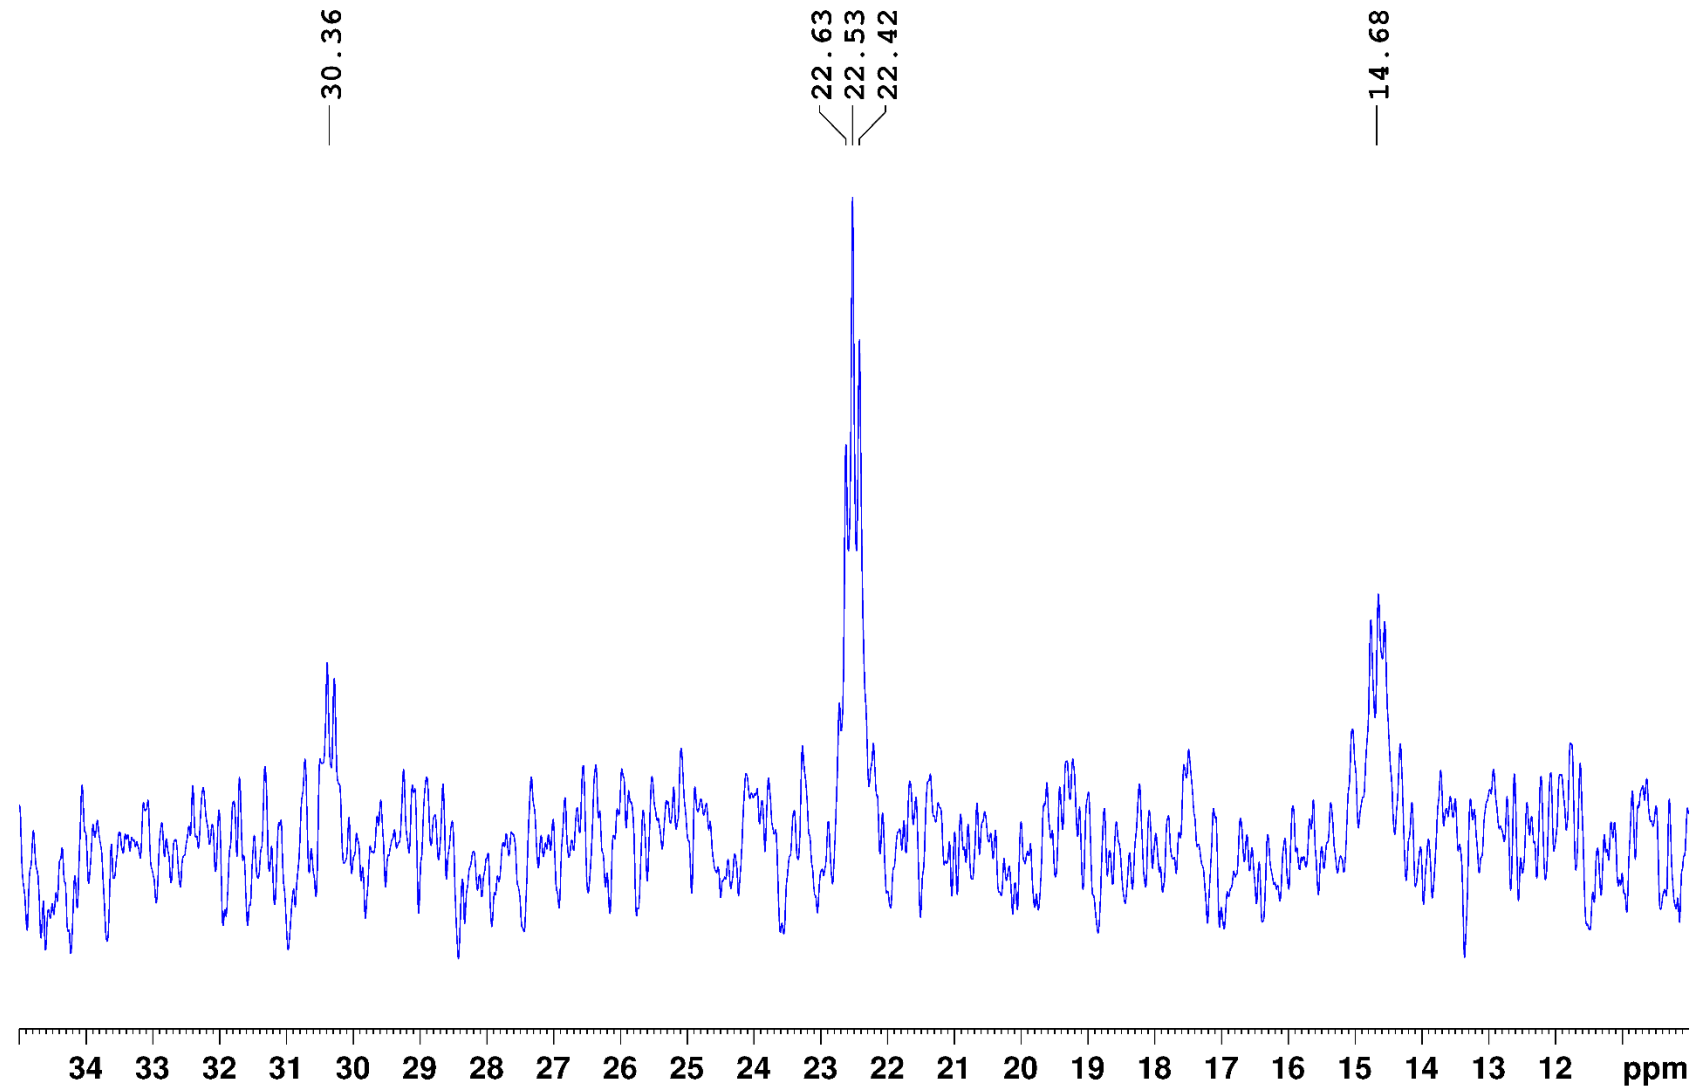

**Figure S58.**  $^{29}\text{Si}\{^1\text{H}\}$  NMR spectrum of  $2^{\text{SiCl}_2}\text{-Cl}$  in  $\text{CD}_2\text{Cl}_2$ .

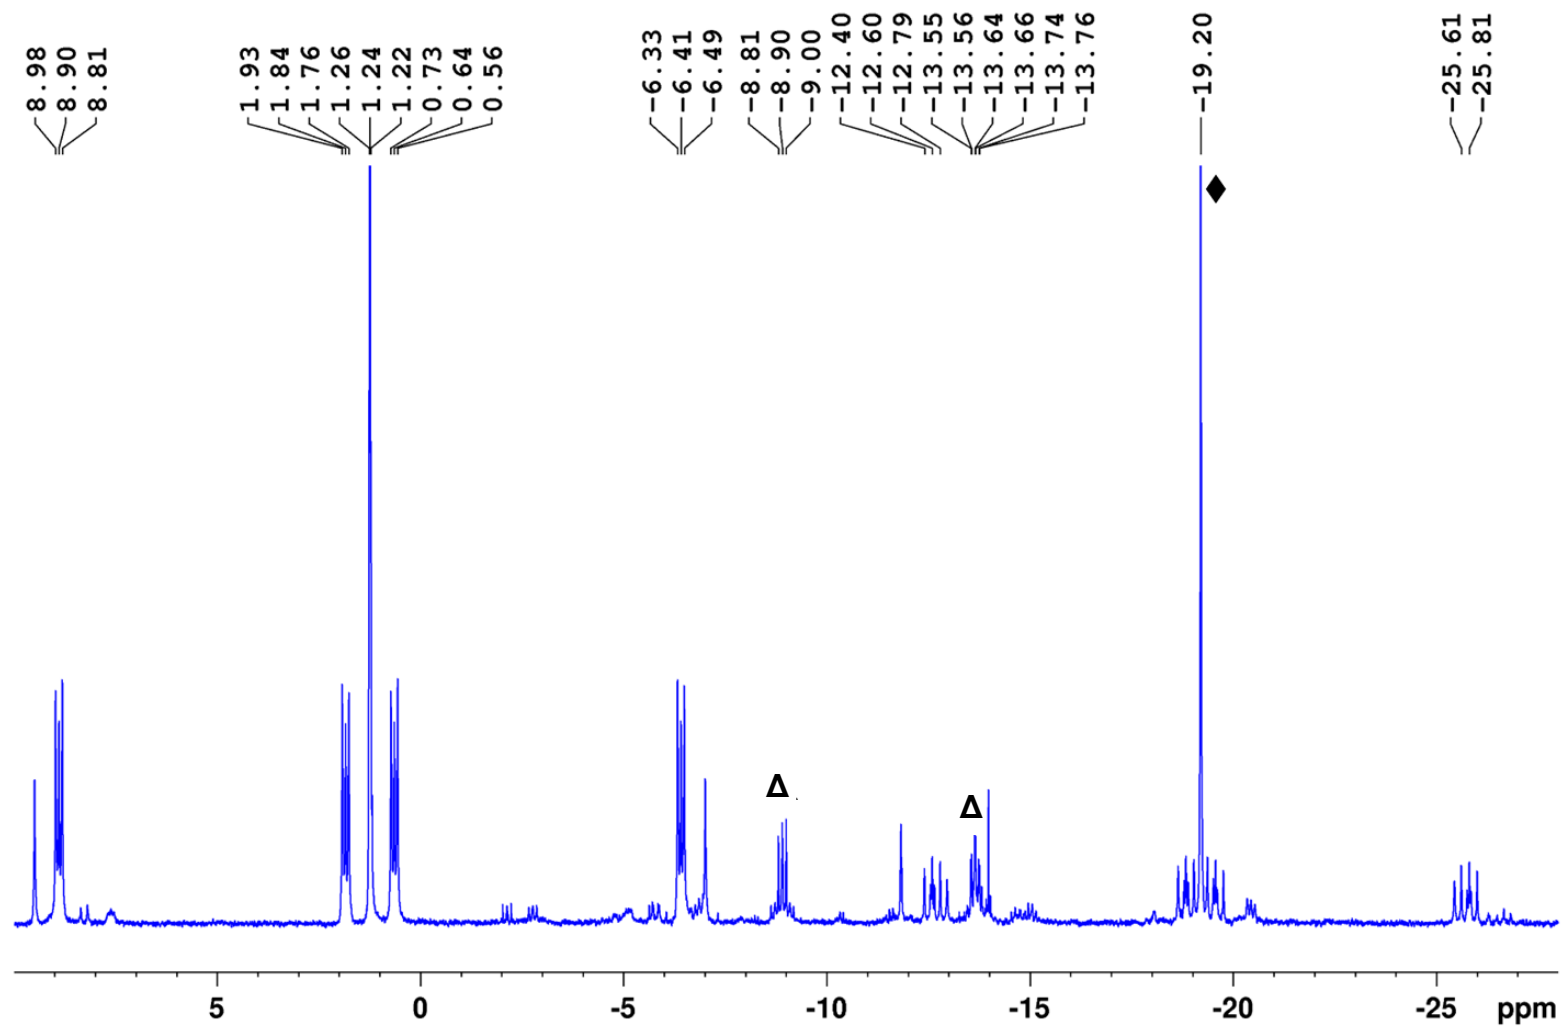

**Figure S59.**  $^{31}\text{P}\{^1\text{H}\}$  NMR spectrum of  $2^{\text{SiCl}_2}\text{-Cl}$  in  $\text{CD}_2\text{Cl}_2$ . The additional resonances marked  $\blacklozenge$  correspond to the decomposition product  $[(\mu\text{-dmpm})_2\text{Pt}_2\text{Cl}_2]$  (ca. 22%), those marked  $\Delta$  to the HCl hydrolysis complex  $4^{\text{SiMeCl}_2}\text{-HCl}$  (ca. 8%).

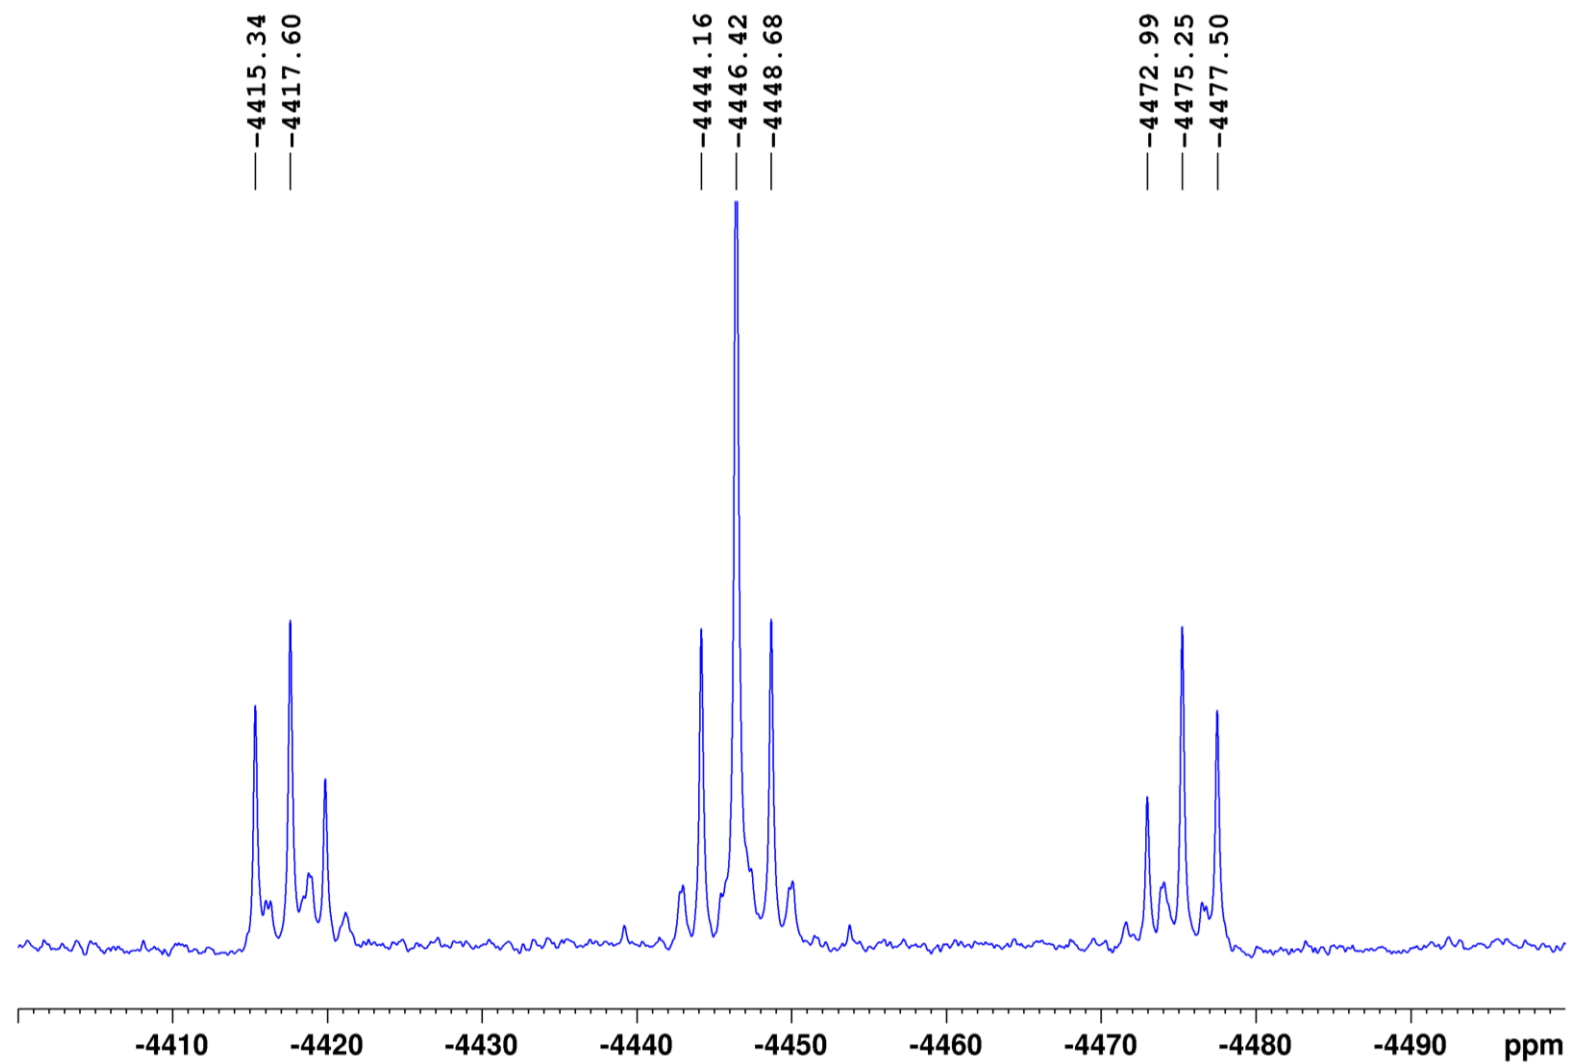

Figure S60.  $^{195}\text{Pt}\{^1\text{H}\}$  NMR spectrum of  $2^{\text{SiCl}_2}\text{-Cl}$  in  $\text{CD}_2\text{Cl}_2$ .

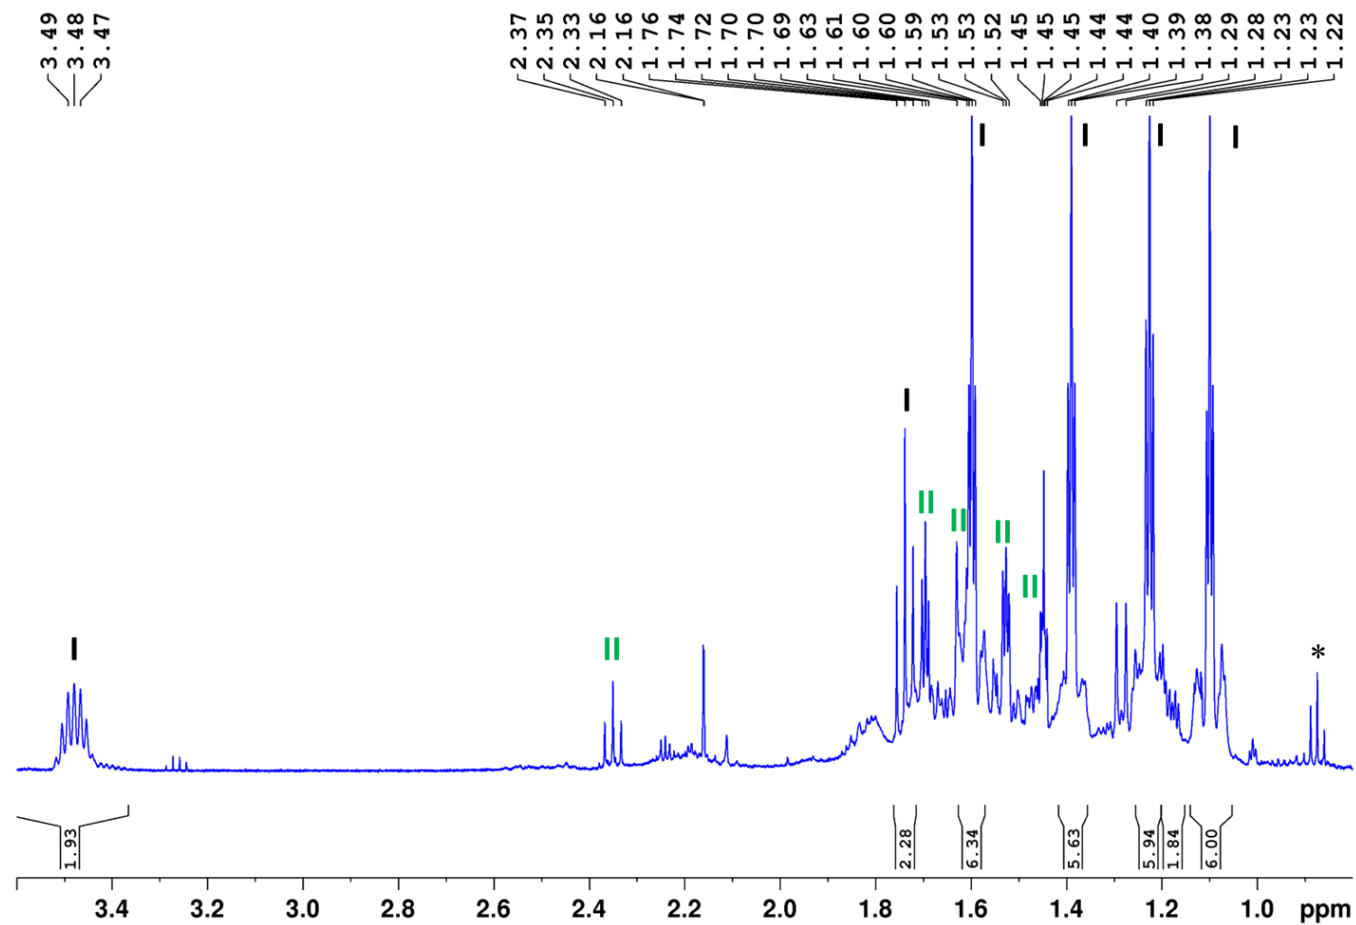

**Figure S61.**  $^1\text{H}$  NMR spectrum of the mixture of  $5^{\text{SiCl}_3}\text{-Br}$  (**I**, 80%) and  $5^{\text{SiCl}_3}\text{-Cl}$  (**II**, 20%) in  $\text{C}_6\text{D}_6$ . The additional resonance marked \* corresponds to residual pentane.

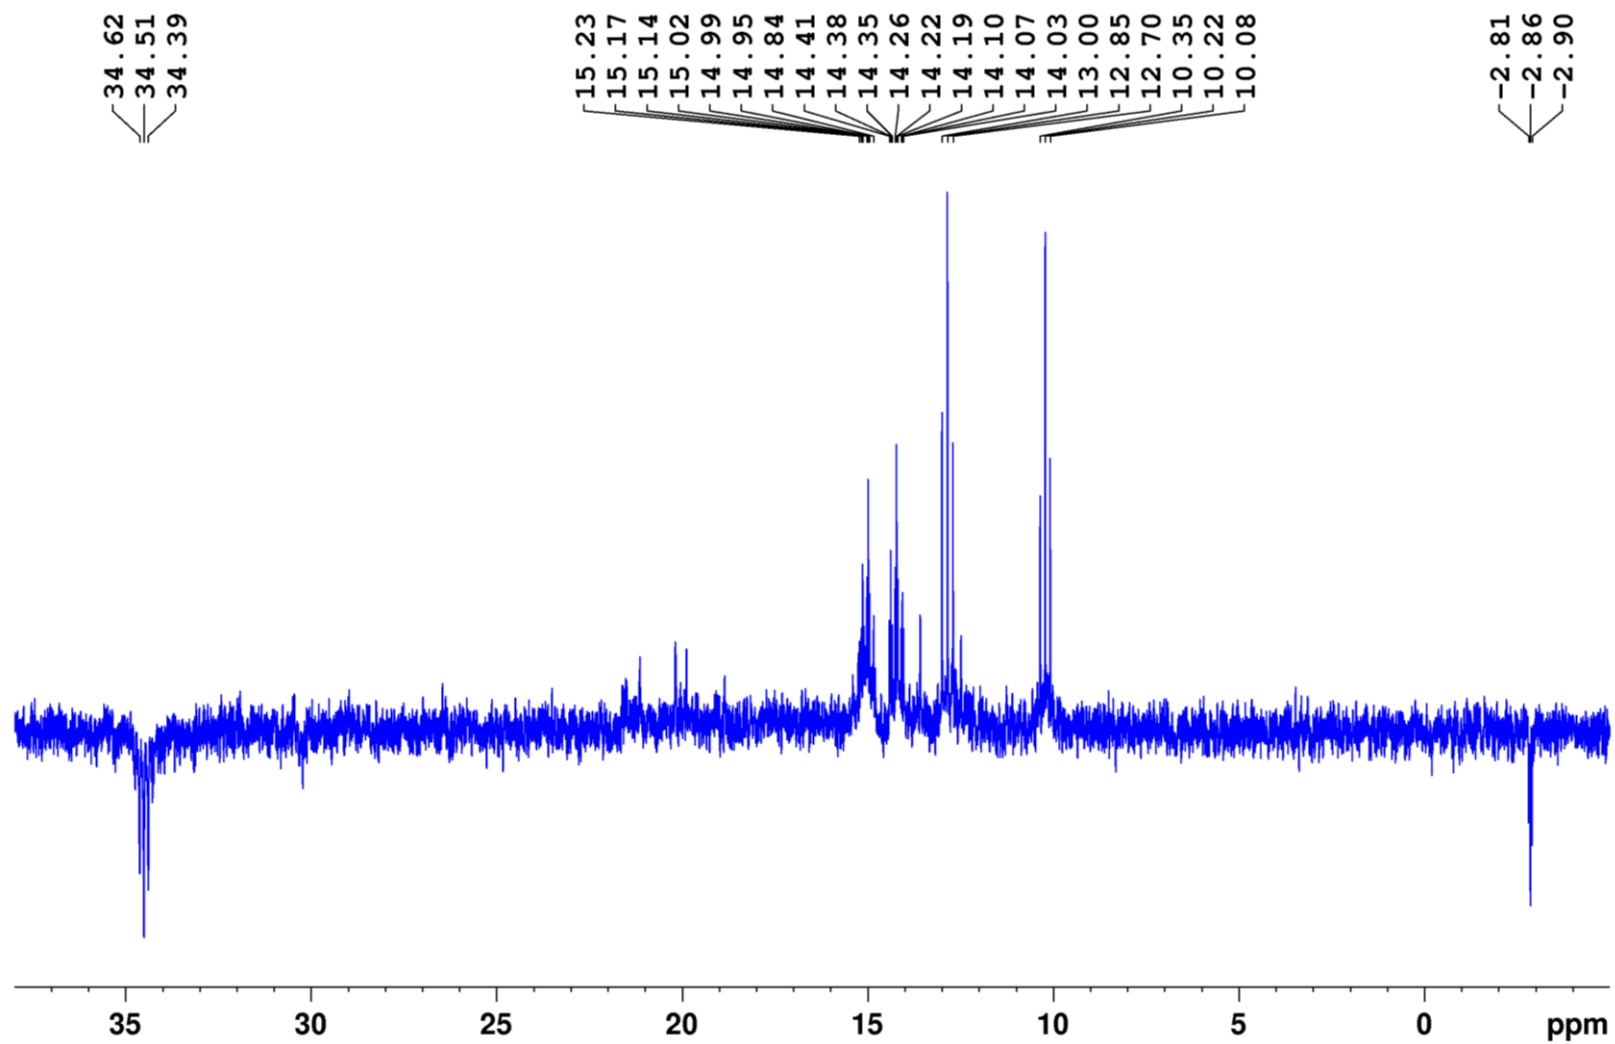

Figure S62. DEPT135- $^{13}\text{C}\{^1\text{H}\}$  NMR spectrum of  $5^{\text{SiCl}_3}\text{-Br}$  and  $5^{\text{SiCl}_3}\text{-Cl}$  in  $\text{C}_6\text{D}_6$ .

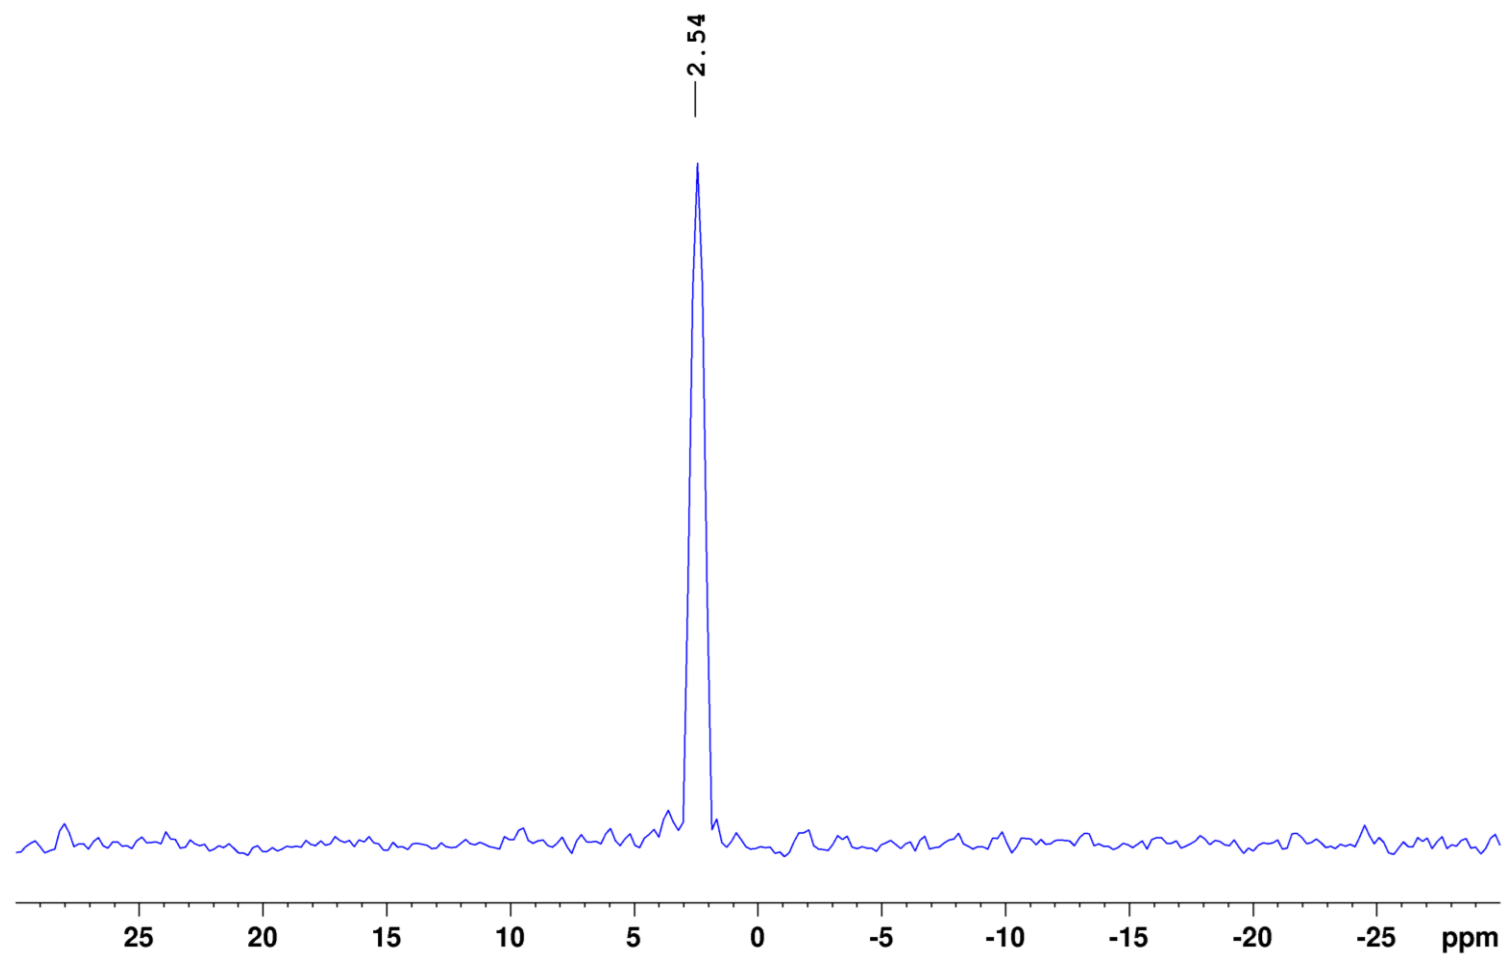

**Figure S63.**  $^{29}\text{Si}\{^1\text{H}\}$  NMR spectrum of  $5^{\text{SiCl}_3}\text{-Br/Cl}$  in  $\text{C}_6\text{D}_6$ .

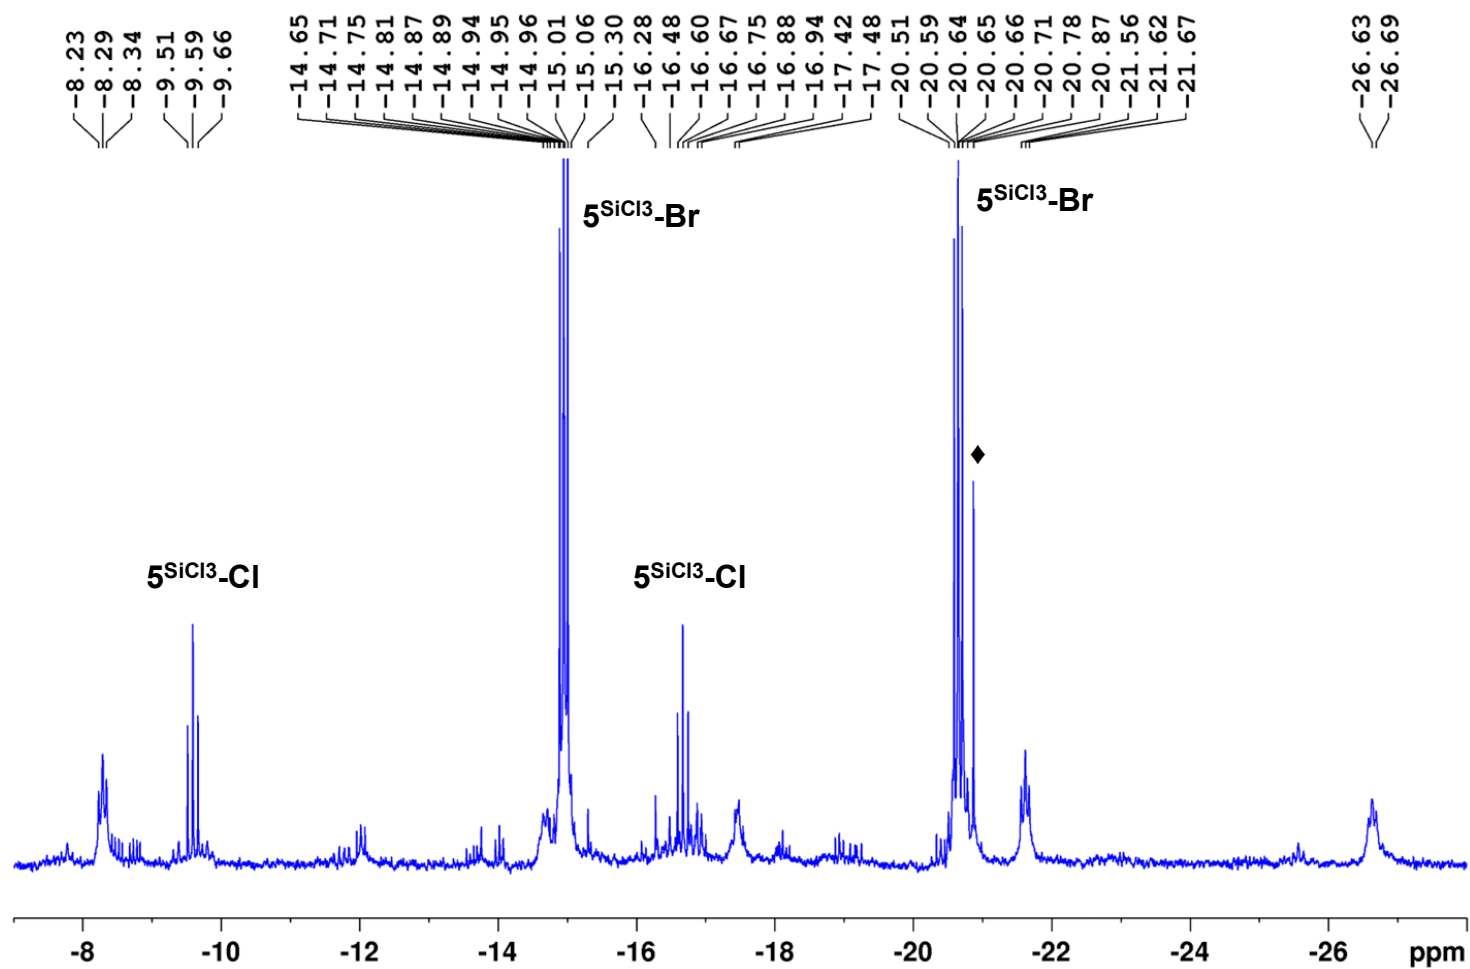

**Figure S64.**  $^{31}\text{P}\{^1\text{H}\}$  NMR spectrum of  $5^{\text{SiCl}_3}\text{-Br}$  and  $5^{\text{SiCl}_3}\text{-Cl}$  in  $\text{C}_6\text{D}_6$ . The additional resonances marked  $\blacklozenge$  correspond to the decomposition product  $[(\mu\text{-dmpm})_2\text{Pt}_2\text{Br}_2]$  (ca. 22%).

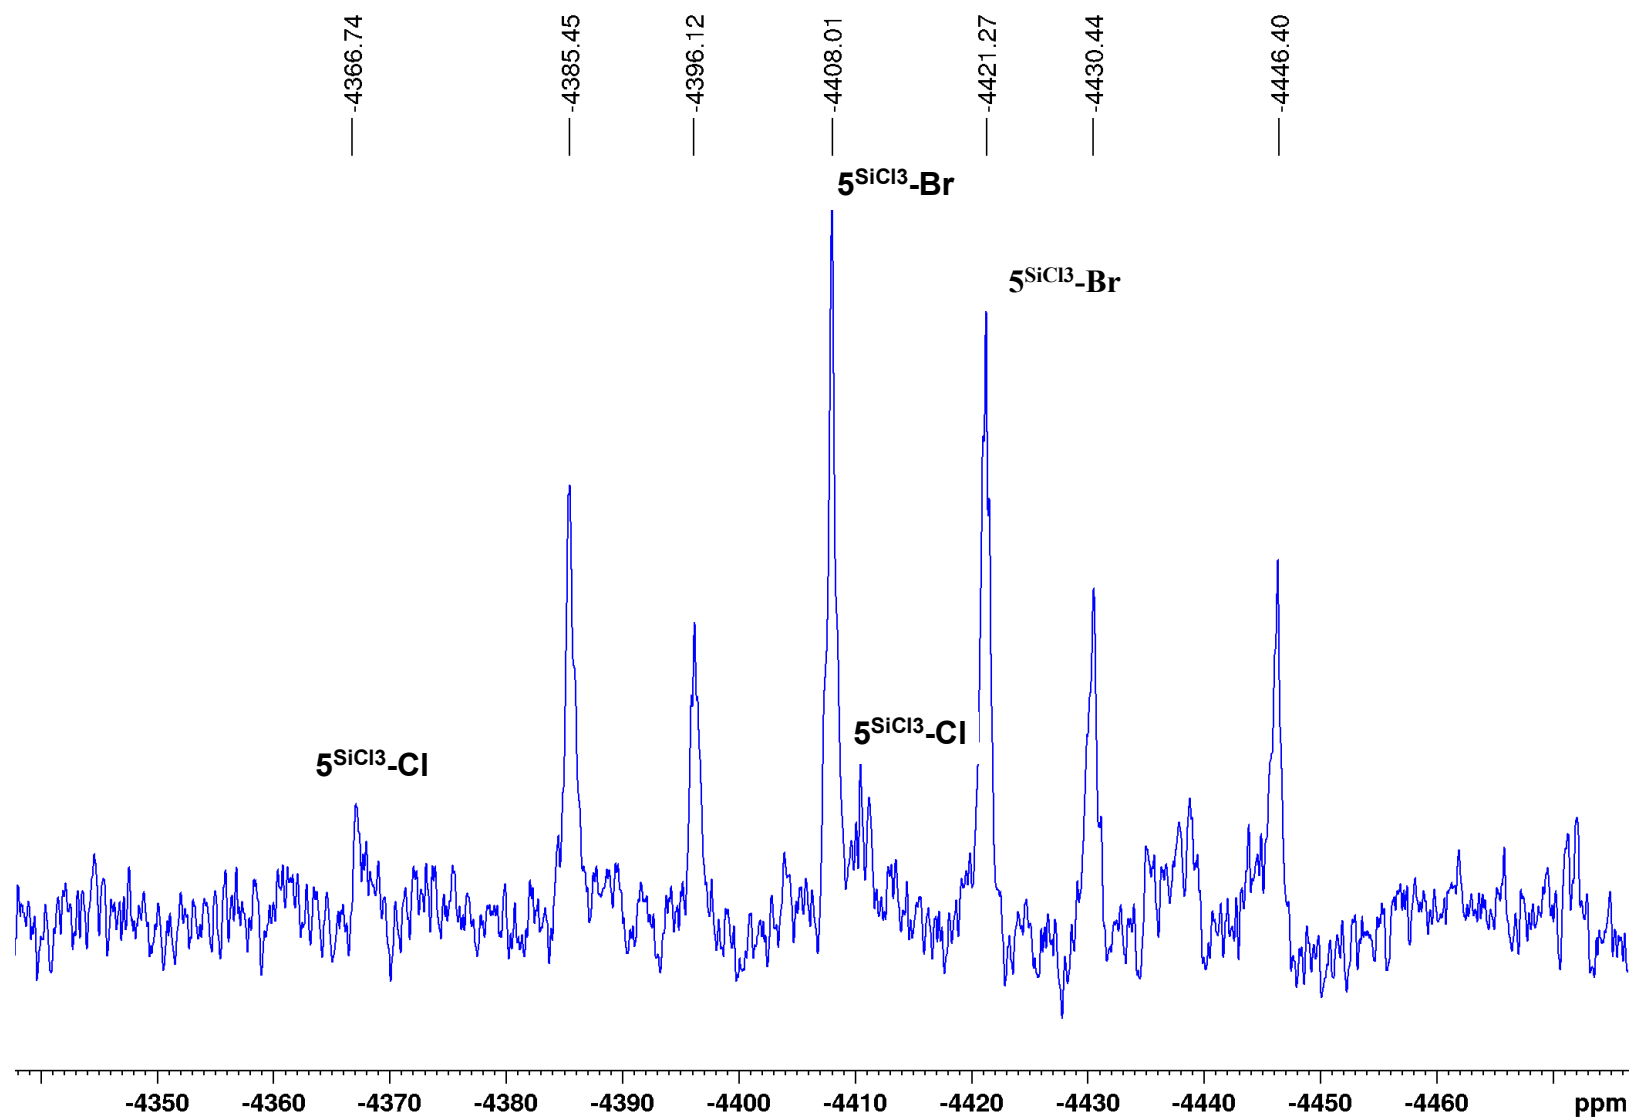

**Figure S65.**  $^{195}\text{Pt}\{^1\text{H}\}$  NMR spectrum of  $5^{\text{SiCl}_3}\text{-Br}$  and  $5^{\text{SiCl}_3}\text{-Cl}$  in  $\text{C}_6\text{D}_6$ . The resonances for  $5^{\text{SiCl}_3}\text{-Cl}$  were assigned by  $^1\text{H}\text{-}^{195}\text{Pt}$  HMBC.

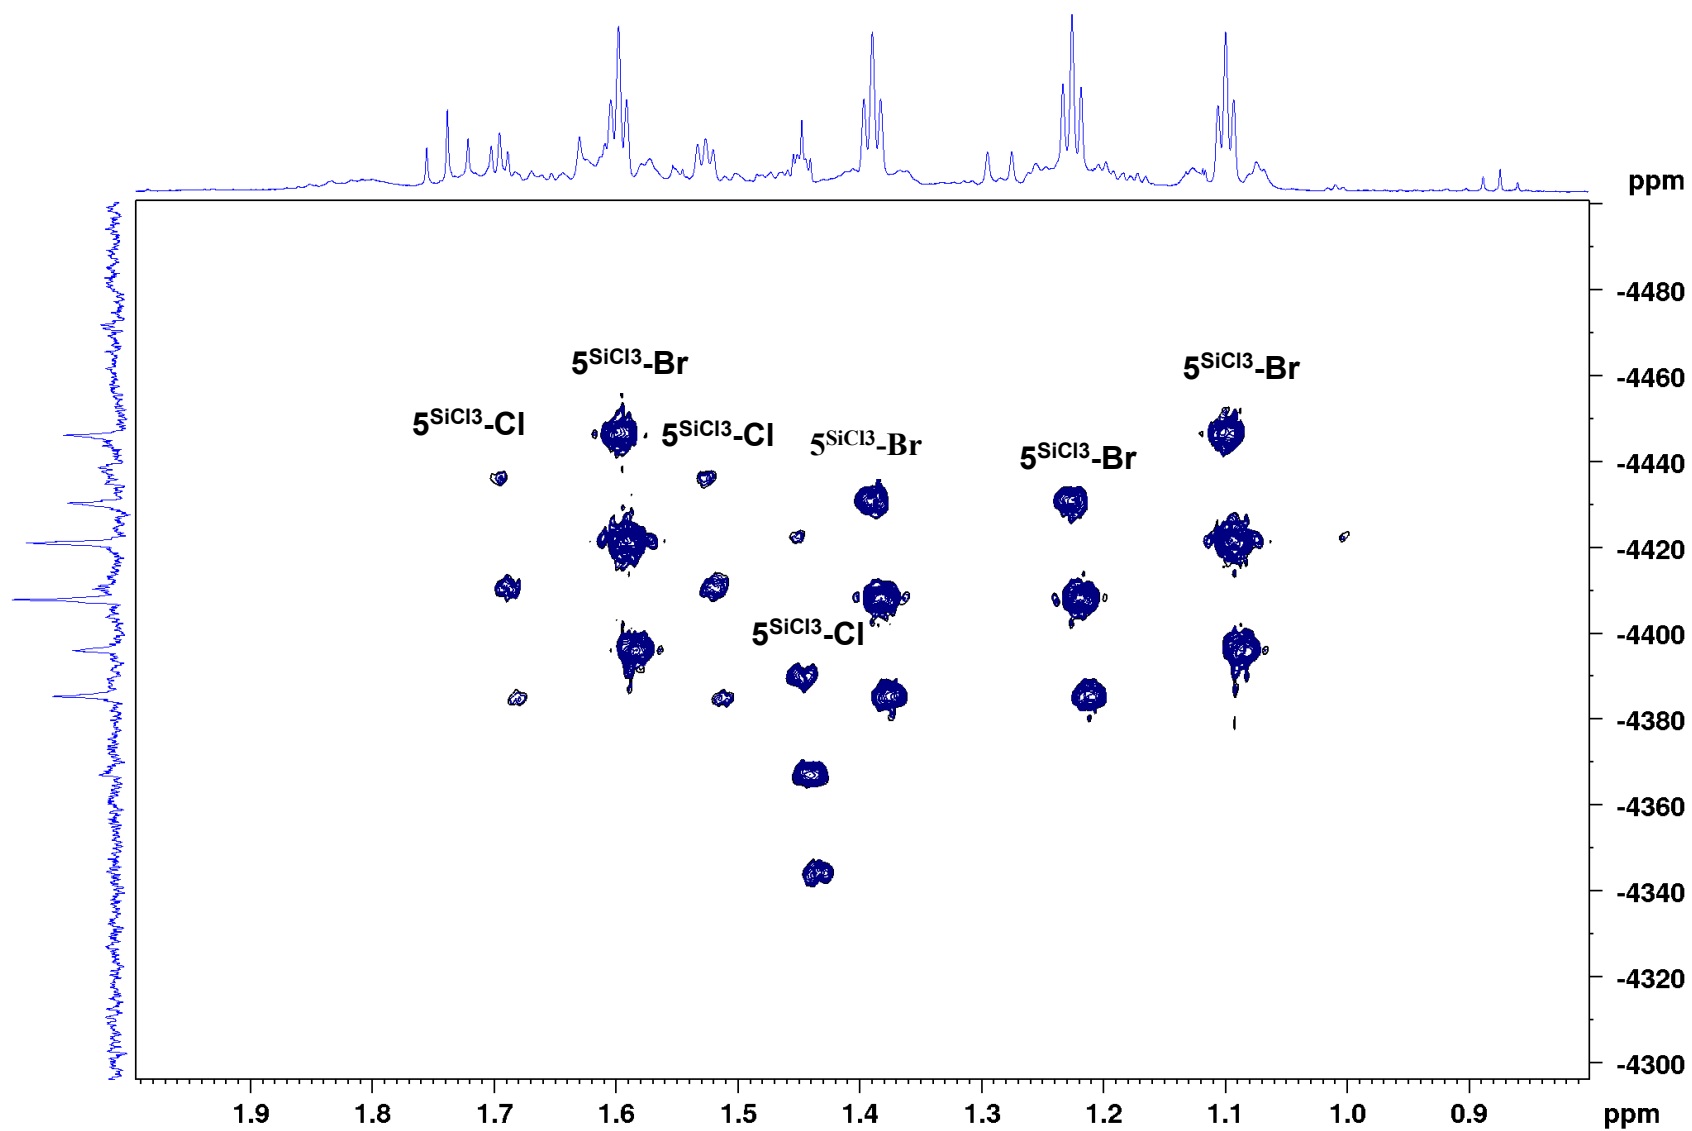

Figure S66.  $^1\text{H}$ - $^{195}\text{Pt}$  HMBC plot of  $5\text{SiCl}_3\text{-Br}$  and  $5\text{SiCl}_3\text{-Cl}$  in  $\text{C}_6\text{D}_6$ .

## Crystallographic data

The crystal data of **3<sup>SiCl<sub>3</sub></sup>-Cl** was collected on a XTAALAB Synergy, DualFlex, HyPix diffractometer with a hybrid pixel array detector and multi-layer mirror monochromated Cu<sub>Kα</sub> radiation. All other crystal data were collected on a Bruker D8 QUEST diffractometer equipped with a CMOS area detector and multi-layer mirror monochromated Mo<sub>Kα</sub> radiation. Structures were solved using the intrinsic phasing method,<sup>5</sup> refined with the SHELXL program<sup>6</sup> and expanded using Fourier techniques. All non-hydrogen atoms were refined anisotropically. Hydrogen atoms were included in structure factor calculations. All hydrogen atoms were assigned to idealised geometric positions, except where stated otherwise in the refinement details.

Crystallographic data have been deposited with the Cambridge Crystallographic Data Center as supplementary publication no. 2406490 (**2<sup>CH<sub>2</sub></sup>-Cl**), 2406494 (**2<sup>CH<sub>2</sub></sup>-Br**), 2406498 (**2<sup>CH<sub>2</sub></sup>-I**), 2406509 (**2<sup>CH<sub>2</sub></sup>-Br'**), 2406550 (**3<sup>SiMe<sub>3</sub></sup>-I**), 2406556 (**3<sup>SiMe<sub>2</sub>Cl</sup>-Cl**), 2406558 (**3<sup>SiMeCl<sub>2</sub></sup>-Cl**), 2406564 (**3<sup>SiCl<sub>3</sub></sup>-Cl**), 2505905 (**4<sup>SiCl<sub>3</sub></sup>-HCl**), 2406843 (**2<sup>SiCl<sub>2</sub></sup>-Cl**), 2406901 (**5<sup>SiCl<sub>3</sub></sup>-Br**). These data can be obtained free of charge from The Cambridge Crystallographic Data Centre *via* [www.ccdc.cam.ac.uk/data\\_request/cif](http://www.ccdc.cam.ac.uk/data_request/cif).

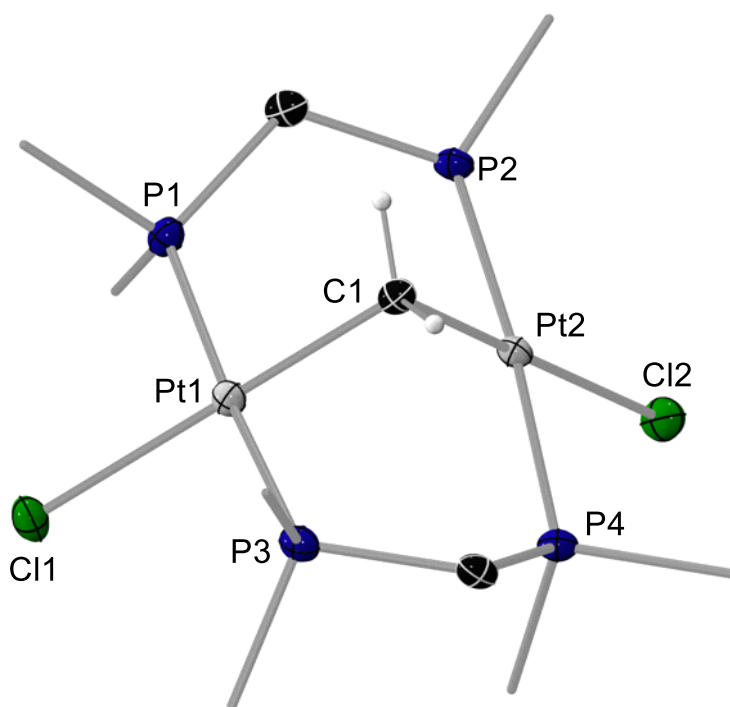

**Figure S67.** Solid-state structure of  $2^{\text{CH}_2}\text{-Cl}$ . Atomic displacement ellipsoids are represented at 50%. Ellipsoids of methyl groups and hydrogen atoms are omitted for clarity, except for methylene protons at C1.

**Refinement details for  $2^{\text{CH}_2}\text{-Cl}$ :** Refined as an inversion twin, with BASF = 2.8%. One reflection was omitted as an outlier (0 2 2).

**Crystal data for  $2^{\text{CH}_2}\text{-Cl}$ :**  $\text{C}_{11}\text{H}_{30}\text{Cl}_2\text{P}_4\text{Pt}_2$ ,  $M_r = 747.31$ , orange plate,  $0.203 \times 0.088 \times 0.061 \text{ mm}^3$ , monoclinic space group  $Pn$ ,  $a = 6.5571(19) \text{ \AA}$ ,  $b = 12.974(2) \text{ \AA}$ ,  $c = 12.042(2) \text{ \AA}$ ,  $\beta = 97.096(11)^\circ$ ,  $V = 1016.6(4) \text{ \AA}^3$ ,  $Z = 2$ ,  $\rho_{\text{calcd}} = 2.441 \text{ g}\cdot\text{cm}^{-3}$ ,  $\mu = 14.310 \text{ mm}^{-1}$ ,  $F(000) = 692$ ,  $T = 100(2) \text{ K}$ ,  $R_I = 0.0174$ ,  $wR_2 = 0.0371$ , Flack parameter = 0.028(8), 3974 independent reflections [ $2\theta \leq 52.044^\circ$ ] and 181 parameters.

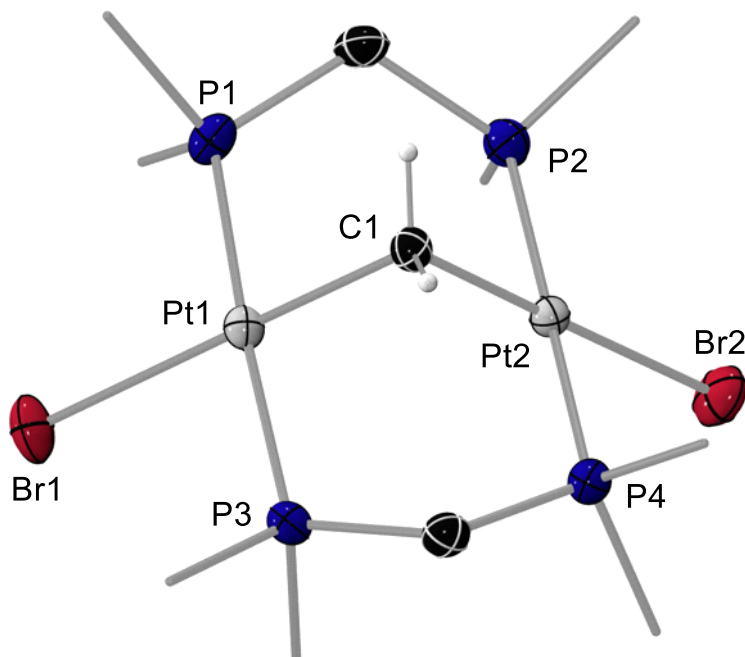

**Figure S68.** Solid-state structure of  $2^{\text{CH}_2}\text{-Br}$ . Atomic displacement ellipsoids are represented at 50%. Ellipsoids of methyl groups and hydrogen atoms are omitted for clarity, except for methylene protons at C1.

**Refinement details for  $2^{\text{CH}_2}\text{-Br}$ :** Refined as an inversion twin, with BASF = 1.2%. The asymmetric unit contains two benzene molecules, one of which was modelled as twofold disordered (RESI 2/3 BENZ) in a 47:53 ratio. All benzene solvent rings were idealised with AFIX 66 and their ADPs restrained to similarity with SIMU 0.004.

**Crystal data for  $2^{\text{CH}_2}\text{-Br}$ :**  $\text{C}_{11}\text{H}_{30}\text{Br}_2\text{P}_4\text{Pt}_2 \cdot (\text{C}_6\text{H}_6)_2$ ,  $M_r = 992.44$ , red block,  $0.106 \times 0.103 \times 0.034 \text{ mm}^3$ , orthorhombic space group  $P2_12_12_1$ ,  $a = 8.8989(15) \text{ \AA}$ ,  $b = 14.2185(17) \text{ \AA}$ ,  $c = 24.703(5) \text{ \AA}$ ,  $V = 3125.6(9) \text{ \AA}^3$ ,  $Z = 4$ ,  $\rho_{\text{calcd}} = 2.109 \text{ g}\cdot\text{cm}^{-3}$ ,  $\mu = 11.714 \text{ mm}^{-1}$ ,  $F(000) = 1864$ ,  $T = 100(2) \text{ K}$ ,  $R_I = 0.0309$ ,  $wR_2 = 0.0437$ , Flack parameter =  $0.012(7)$ , 9541 independent reflections [ $2\theta \leq 61.038^\circ$ ] and 308 parameters.

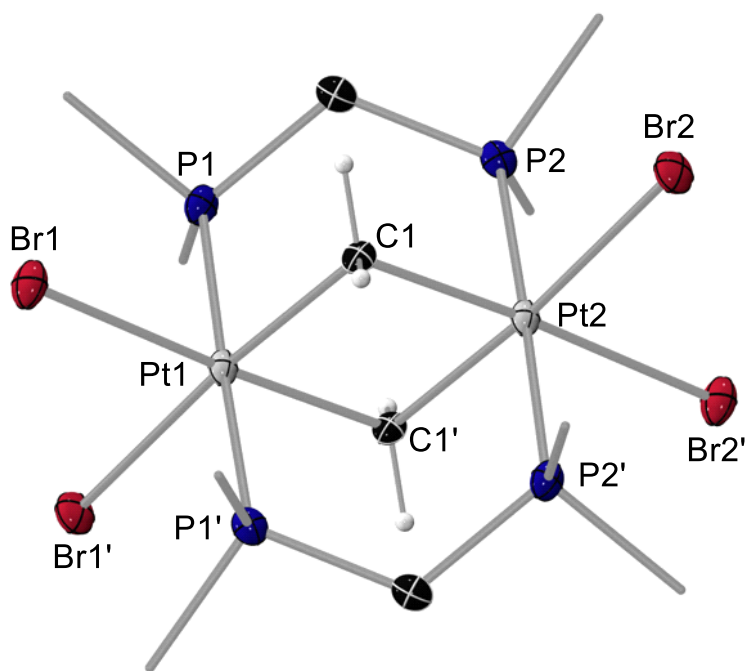

**Figure S69.** Solid-state structure of  $2^{\text{CH}_2}\text{-Br}'$ . Atomic displacement ellipsoids are represented at 50%. Ellipsoids of methyl groups and hydrogen atoms are omitted for clarity, except for methylene protons at C1.

**Refinement details for  $2^{\text{CH}_2}\text{-Br}'$ :** none.

**Crystal data for  $2^{\text{CH}_2}\text{-Br}'$ :**  $\text{C}_{12}\text{H}_{32}\text{Br}_4\text{P}_4\text{Pt}_2$ ,  $M_r = 1010.07$ , yellow plate,  $0.179 \times 0.133 \times 0.055 \text{ mm}^3$ , monoclinic space group  $C2/c$ ,  $a = 18.672(4) \text{ \AA}$ ,  $b = 10.955(4) \text{ \AA}$ ,  $c = 13.051(5) \text{ \AA}$ ,  $\alpha = 90^\circ$ ,  $\beta = 117.21(3)^\circ$ ,  $\gamma = 90^\circ$ ,  $V = 2374.2(14) \text{ \AA}^3$ ,  $Z = 4$ ,  $\rho_{\text{calcd}} = 2.826 \text{ g}\cdot\text{cm}^{-3}$ ,  $\mu = 18.768 \text{ mm}^{-1}$ ,  $F(000) = 1840$ ,  $T = 100(2) \text{ K}$ ,  $R_I = 0.0710$ ,  $wR_2 = 0.0801$ , 5339 independent reflections [ $2\theta \leq 73.042^\circ$ ] and 104 parameters.

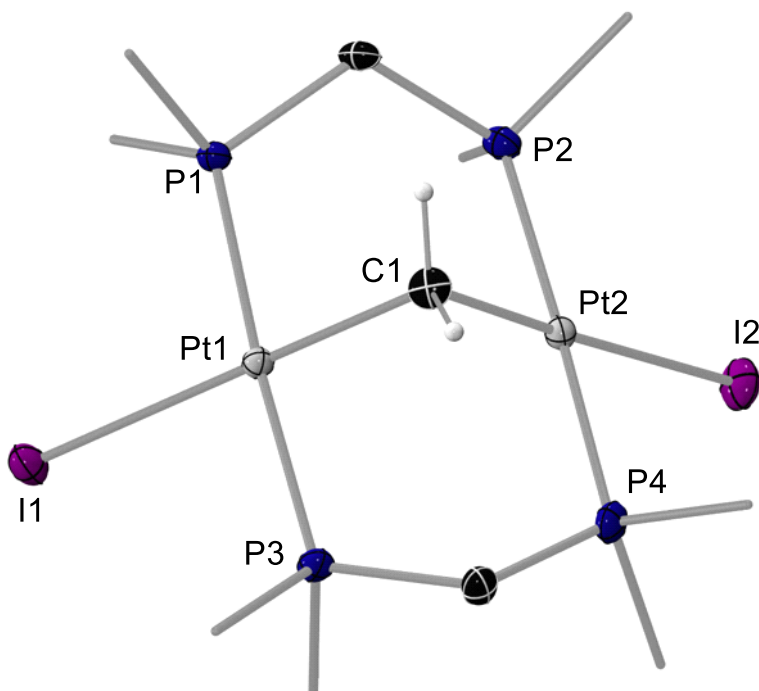

**Figure S70.** Solid-state structure of  $2^{\text{CH}_2\text{-I}}$ . Atomic displacement ellipsoids are represented at 50%. Ellipsoids of methyl groups and hydrogen atoms are omitted for clarity, except for methylene protons at C1.

**Refinement details for  $2^{\text{CH}_2\text{-I}}$ :** Refined as an inversion twin, with BASF = 4.5%. One  $\text{PMe}_2$  group was modelled as twofold disordered (RESI 11/12  $\text{PMe}_2$ ) in a 71:29 ratio. ADPs within the disorder were restrained to similarity with SIMU 0.003 and approximated to isotropy with ISOR 0.005.

**Crystal data for  $2^{\text{CH}_2\text{-I}}$ :**  $\text{C}_{11}\text{H}_{30}\text{I}_2\text{P}_4\text{Pt}_2 \cdot \text{C}_6\text{H}_6$ ,  $M_r = 1008.32$ , yellow plate,  $0.130 \times 0.084 \times 0.036 \text{ mm}^3$ , monoclinic space group  $Cc$ ,  $a = 13.9003(12) \text{ \AA}$ ,  $b = 16.8782(15) \text{ \AA}$ ,  $c = 12.3088(10) \text{ \AA}$ ,  $\beta = 109.790(3)^\circ$ ,  $V = 2717.2(4) \text{ \AA}^3$ ,  $Z = 4$ ,  $\rho_{\text{calcd}} = 2.465 \text{ g}\cdot\text{cm}^{-3}$ ,  $\mu = 12.795 \text{ mm}^{-1}$ ,  $F(000) = 1840$ ,  $T = 100(2) \text{ K}$ ,  $R_1 = 0.0240$ ,  $wR_2 = 0.0436$ , Flack parameter = 0.045(5), 5927 independent reflections [ $2\theta \leq 54.212^\circ$ ] and 274 parameters.

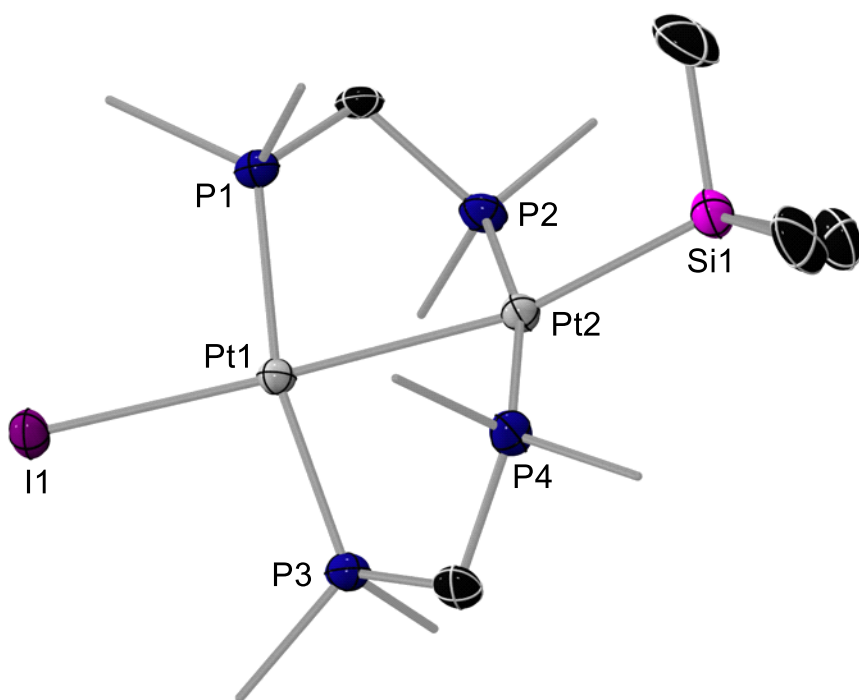

**Figure S71.** Solid-state structure of **3<sup>SiMe<sub>3</sub></sup>-I**. Atomic displacement ellipsoids are represented at 50%. Ellipsoids of dmpm methyl groups and hydrogen atoms are omitted for clarity.

**Refinement details for 3<sup>SiMe<sub>3</sub></sup>-I:** Some reflections were removed from refinement as outliers. The unit cell contains two rotationally disordered half benzene molecules, one positioned on an inversion center and the other bisected by a  $C_2$  axis, which were modelled with PARTs -1 10.5 and idealised rings (AFIX 6). ADPs within these disorders were restrained to similarity with SIMU 0.005 and approximated to isotropy with ISOR 0.01. The unit cell contains partially occupied and highly disordered pentane molecules positioned around symmetry operators, which could not be modelled adequately and have been treated as a diffuse contribution to the overall scattering without specific atom positions by the Platon program Squeeze.<sup>7</sup> 194 electrons were thus removed from the unit cell, corresponding to 4.6 pentane molecules, i.e. ca. 0.5 molecules of pentane per asymmetric unit.

**Crystal data for 3<sup>SiMe<sub>3</sub></sup>-I:**  $C_{13}H_{34}IP_4Pt_2Si \cdot (C_6H_6) \cdot [(C_5H_{12})_{0.5}]_{\text{squeezed}}$ ,  $M_r = 973.66$ , yellow needle,  $0.301 \times 0.096 \times 0.078 \text{ mm}^3$ , monoclinic space group  $C2/c$ ,  $a = 32.531(2) \text{ \AA}$ ,  $b = 16.2293(15) \text{ \AA}$ ,  $c = 12.3818(11) \text{ \AA}$ ,  $\beta = 94.934(3)^\circ$ ,  $V = 6512.8(10) \text{ \AA}^3$ ,  $Z = 8$ ,  $\rho_{\text{calcd}} = 1.986 \text{ g} \cdot \text{cm}^{-3}$ ,  $\mu = 9.768 \text{ mm}^{-1}$ ,  $F(000) = 3496$ ,  $T = 100(2) \text{ K}$ ,  $R_I = 0.0512$ ,  $wR_2 = 0.0793$ , 6666 independent reflections [ $2\theta \leq 52.762^\circ$ ] and 255 parameters.

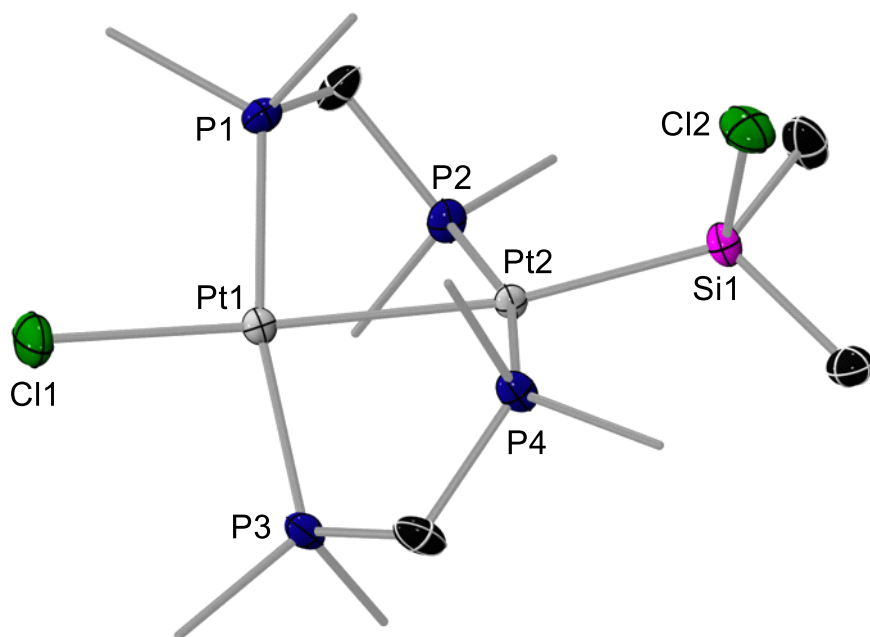

**Figure S72.** Solid-state structure of  $3^{\text{SiMe}_2\text{Cl}}\text{-Cl}$ . Atomic displacement ellipsoids are represented at 50%. Ellipsoids of dmpm methyl groups and hydrogen atoms are omitted for clarity.

**Refinement details for  $3^{\text{SiMe}_2\text{Cl}}\text{-Cl}$ :** The asymmetric unit contains a benzene solvent molecule, which was modelled as twofold rotationally disordered (RESI 3/33 BENZ) in a 78:22 ratio. The benzene rings within the disorder were idealised with AFIX 6. ADPs within this disorder were restrained to similarity with SIMU 0.005. The  $\text{SiMe}_2\text{Cl}$  substituent at PT1 was modelled as twofold rotationally disordered (RESI 2/22 SI) in a 73:27 ratio in C1 and CL1. The SI1\_1–C1\_2 and SI1\_1–C1\_22 distances were restrained to similarity using SADI.

**Crystal data for  $3^{\text{SiMe}_2\text{Cl}}\text{-Cl}$ :**  $\text{C}_{12}\text{H}_{34}\text{Cl}_2\text{P}_4\text{Pt}_2\text{Si}\cdot\text{C}_6\text{H}_6$ ,  $M_r = 869.55$ , colourless block,  $0.229 \times 0.178 \times 0.142 \text{ mm}^3$ , monoclinic space group  $P2_1/n$ ,  $a = 9.639(4) \text{ \AA}$ ,  $b = 29.672(11) \text{ \AA}$ ,  $c = 9.783(4) \text{ \AA}$ ,  $\beta = 94.077(13)^\circ$ ,  $V = 2791(2) \text{ \AA}^3$ ,  $Z = 4$ ,  $\rho_{\text{calcd}} = 2.070 \text{ g}\cdot\text{cm}^{-3}$ ,  $\mu = 10.483 \text{ mm}^{-1}$ ,  $F(000) = 1648$ ,  $T = 100(2) \text{ K}$ ,  $R_1 = 0.0416$ ,  $wR_2 = 0.0740$ , 5691 independent reflections [ $2\theta \leq 52.744^\circ$ ] and 332 parameters.

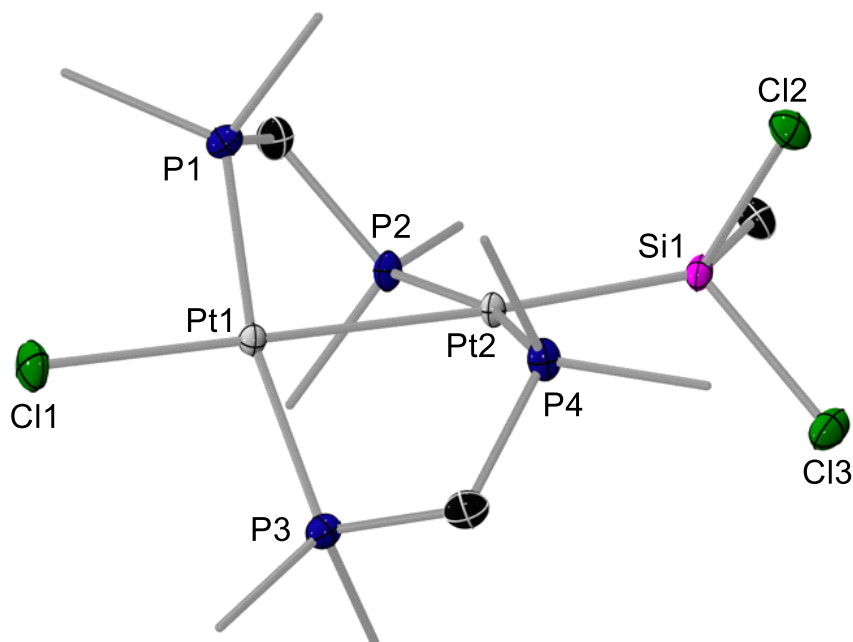

**Figure S73.** Solid-state structure of  $3^{\text{SiMeCl}_2}\text{-Cl}$ . Atomic displacement ellipsoids are represented at 50%. Ellipsoids of dmpm methyl groups and hydrogen atoms are omitted for clarity.

**Refinement details for  $3^{\text{SiMeCl}_2}\text{-Cl}$ :** The asymmetric unit contains one molecule of *o*-DFB, modelled as threefold rotationally disordered (RESI 21/22/23 DFB) in a 54:11:35 ratio using SUMP and there FVAR. Benzene rings within the disorder were idealised with AFIX 66, ADPs were restrained to similarity with SIMU 0.01, and 1,2 and 1,3 distances with SAME.

**Crystal data for  $3^{\text{SiMeCl}_2}\text{-Cl}$ :**  $\text{C}_{11}\text{H}_{31}\text{Cl}_3\text{P}_4\text{Pt}_2\text{Si}\cdot\text{C}_6\text{H}_4\text{F}_2$ ,  $M_r = 925.95$ , yellow block,  $0.128 \times 0.114 \times 0.047 \text{ mm}^3$ , monoclinic space group  $P2_1/n$ ,  $a = 10.199(3) \text{ \AA}$ ,  $b = 9.446(2) \text{ \AA}$ ,  $c = 29.217(8) \text{ \AA}$ ,  $\beta = 90.426(10)^\circ$ ,  $V = 2814.7(12) \text{ \AA}^3$ ,  $Z = 4$ ,  $\rho_{\text{calcd}} = 2.185 \text{ g}\cdot\text{cm}^{-3}$ ,  $\mu = 10.503 \text{ mm}^{-1}$ ,  $F(000) = 1744$ ,  $T = 100(2) \text{ K}$ ,  $R_1 = 0.0370$ ,  $wR_2 = 0.0712$ , 5547 independent reflections [ $2\theta \leq 52.04^\circ$ ] and 382 parameters.

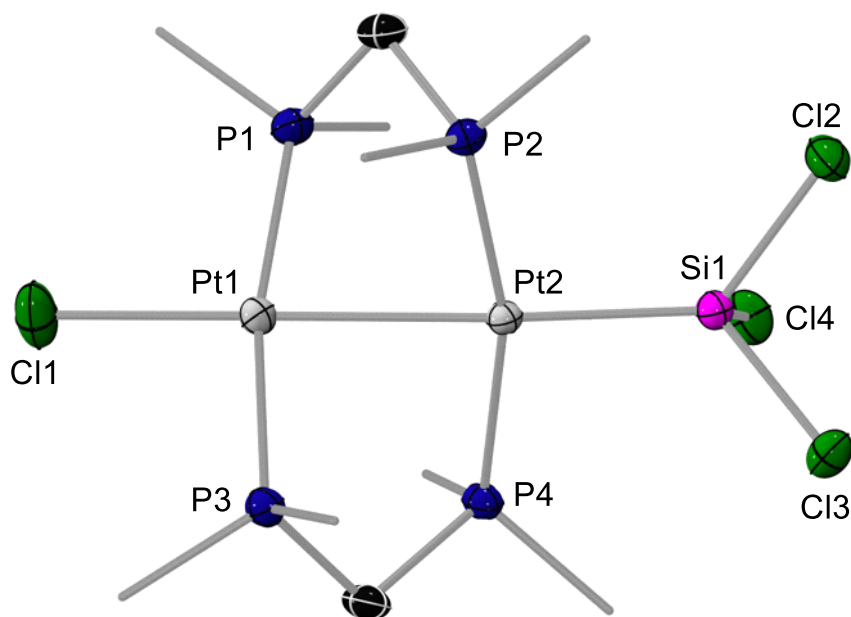

**Figure S74.** Solid-state structure of  $3^{\text{SiCl}_3}\text{-Cl}$ . Atomic displacement ellipsoids are represented at 50%. Ellipsoids of methyl groups and hydrogen atoms are omitted for clarity.

**Refinement details for  $3^{\text{SiCl}_3}\text{-Cl}$ :** The asymmetric unit contains one benzene molecule, which was modelled as twofold rotationally disordered (RESI 21/22 BENZ) in a 53:47 ratio. The benzene rings within the disorder were idealised with AFIX 66 and ADPs restrained to similarity with AFIX 0.01.

**Crystal data for  $3^{\text{SiCl}_3}\text{-Cl}$ :**  $\text{C}_{10}\text{H}_{28}\text{Cl}_4\text{P}_4\text{Pt}_2\text{Si}\cdot\text{C}_6\text{H}_6$ ,  $M_r = 910.38$ , colourless block,  $0.200\times 0.050\times 0.030\text{ mm}^3$ , monoclinic space group  $P2_1/n$ ,  $a = 9.58710(10)\text{ \AA}$ ,  $b = 29.4441(2)\text{ \AA}$ ,  $c = 9.73830(10)\text{ \AA}$ ,  $\beta = 94.3660(10)^\circ$ ,  $V = 2740.98(4)\text{ \AA}^3$ ,  $Z = 4$ ,  $\rho_{\text{calcd}} = 2.206\text{ g}\cdot\text{cm}^{-3}$ ,  $\mu = 25.058\text{ mm}^{-1}$ ,  $F(000) = 1712$ ,  $T = 100(2)\text{ K}$ ,  $R_1 = 0.0188$ ,  $wR_2 = 0.0440$ , 5026 independent reflections [ $2\theta \leq 136.5^\circ$ ] and 283 parameters.

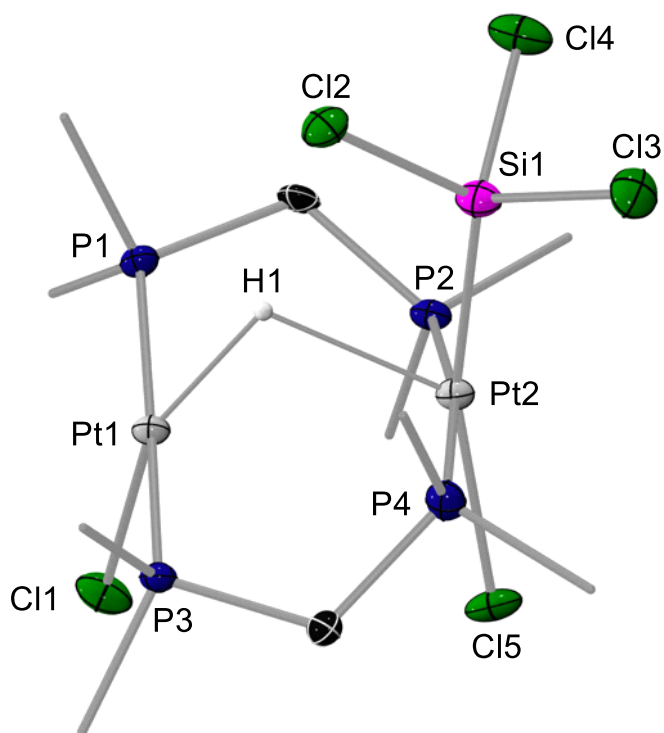

**Figure S75.** Solid-state structure of  $4^{\text{SiCl}_3}\text{-HCl}$ . Atomic displacement ellipsoids are represented at 50%. Ellipsoids of methyl groups and hydrogen atoms are omitted for clarity, except for bridging hydride H1.

**Refinement details for  $4^{\text{SiCl}_3}\text{-HCl}$ :** The bridging hydride H1 was detected in the inverse Fourier map and freely refined.

**Crystal data for  $4^{\text{SiCl}_3}\text{-HCl}$ :**  $\text{C}_{10}\text{H}_{29}\text{Cl}_5\text{P}_4\text{Pt}_2\text{Si}$ ,  $M_r = 204.41$ , yellow plate,  $0.264 \times 0.103 \times 0.072 \text{ mm}^3$ , monoclinic space group  $P2_1/c$ ,  $a = 16.867(4) \text{ \AA}$ ,  $b = 9.601(3) \text{ \AA}$ ,  $c = 16.707(4) \text{ \AA}$ ,  $\beta = 116.809(8)^\circ$ ,  $V = 2414.9(11) \text{ \AA}^3$ ,  $Z = 17$ ,  $\rho_{\text{calcd}} = 2.389 \text{ g}\cdot\text{cm}^{-3}$ ,  $\mu = 12.435 \text{ mm}^{-1}$ ,  $F(000) = 1616$ ,  $T = 100(2) \text{ K}$ ,  $R_1 = 0.0526$ ,  $wR_2 = 0.0944$ , 4752 independent reflections [ $2\theta \leq 52.04^\circ$ ] and 210 parameters.

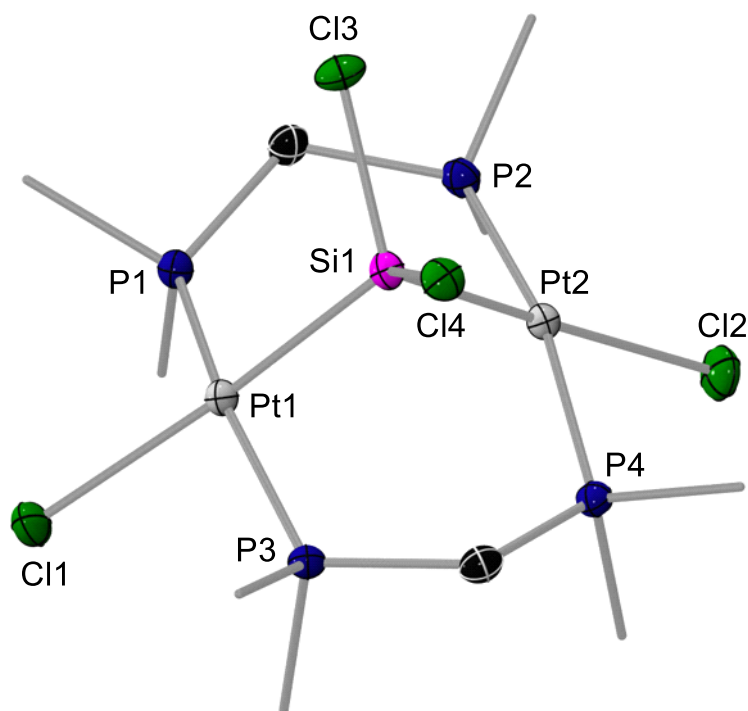

**Figure S76.** Solid-state structure of  $2^{\text{SiCl}_2}\text{-Cl}$ . Atomic displacement ellipsoids are represented at 50%. Ellipsoids of methyl groups and hydrogen atoms are omitted for clarity.

**Refinement details for  $2^{\text{SiCl}_2}\text{-Cl}$ :** The large residual electron density ( $7.12 \text{ e } \text{\AA}^{-3}$  at  $0.89 \text{ \AA}$  from Pt2) results from a second unidentified diplatinum complex. However, as this byproduct represents less than 2% of the sample, attempts to model the disorder failed. The data may only serve as proof of connectivity for **7** and may not be discussed in detail.

**Crystal data for  $2^{\text{SiCl}_2}\text{-Cl}$ :**  $\text{C}_{13}\text{H}_{31}\text{Cl}_4\text{P}_4\text{Pt}_2\text{Si}$ ,  $M_r = 871.33$ , green block,  $0.113 \times 0.104 \times 0.066 \text{ mm}^3$ , monoclinic space group  $P2_1/c$ ,  $a = 16.205(3) \text{ \AA}$ ,  $b = 12.4401(17) \text{ \AA}$ ,  $c = 12.880(3) \text{ \AA}$ ,  $\beta = 103.351(9)^\circ$ ,  $V = 2526.3(8) \text{ \AA}^3$ ,  $Z = 4$ ,  $\rho_{\text{calcd}} = 2.291 \text{ g}\cdot\text{cm}^{-3}$ ,  $\mu = 11.785 \text{ mm}^{-1}$ ,  $F(000) = 1628$ ,  $T = 100(2) \text{ K}$ ,  $R_1 = 0.0318$ ,  $wR_2 = 0.0752$ , 4976 independent reflections [ $2\theta \leq 52.044^\circ$ ] and 226 parameters.

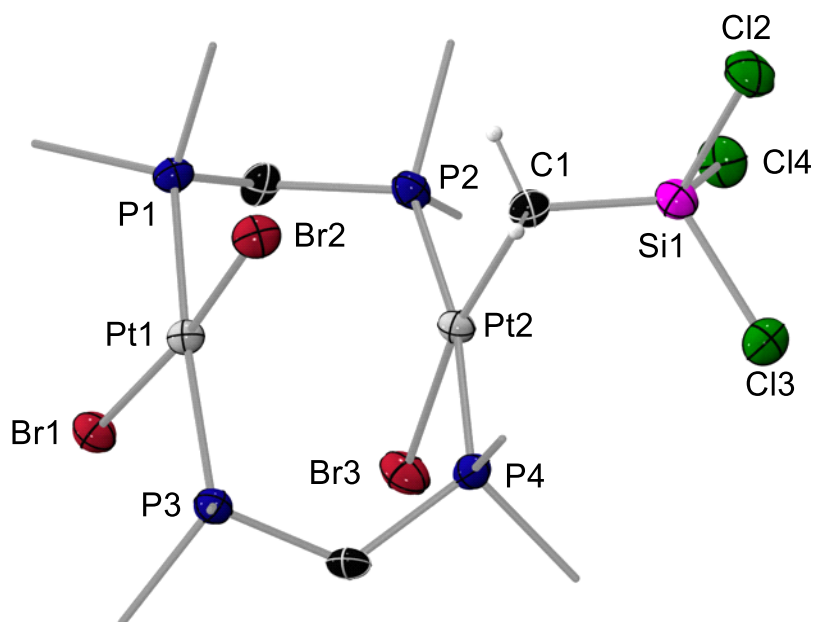

**Figure S77.** Solid-state structure of **5<sup>SiCl<sub>3</sub></sup>-Br**. Atomic displacement ellipsoids are represented at 50%. Ellipsoids of methyl groups and hydrogen atoms are omitted for clarity, except for methylene protons at C1.

**Refinement details for 5<sup>SiCl<sub>3</sub></sup>-Br:** Two low-resolution reflections, that were affected by beamstop, were removed from refinement: (-1 2 0) and (0 2 1). The unit cell contains pentane molecules, disordered and positioned around symmetry operators, which could not be adequately modelled and have been treated as a diffuse contribution to the overall scattering without specific atom positions by the Platon program Squeeze.<sup>7</sup> 393 electrons were thus removed from the unit cell, corresponding to 9.4 pentane molecules, i.e. ca. 0.5 per asymmetric unit.

**Crystal data for 5<sup>SiCl<sub>3</sub></sup>-Br:** C<sub>11</sub>H<sub>30</sub>Br<sub>3</sub>Cl<sub>3</sub>P<sub>4</sub>Pt<sub>2</sub>Si·[(C<sub>5</sub>H<sub>10</sub>)<sub>0.5</sub>]<sub>squeezed</sub>, *M<sub>r</sub>* = 1085.64, colourless block, 0.159×0.143×0.089 mm<sup>3</sup>, hexagonal space group  $\bar{R}3:H$ , *a* = 36.1930(9) Å, *b* = 36.1930(9) Å, *c* = 11.8809(5) Å, *V* = 13478.1(9) Å<sup>3</sup>, *Z* = 18,  $\rho_{\text{calcd}}$  = 3.210 g·cm<sup>-3</sup>,  $\mu$  = 18.476 mm<sup>-1</sup>, *F*(000) = 8676, *T* = 100(2) K, *R*<sub>1</sub> = 0.0458, *wR*<sub>2</sub> = 0.0709, 6624 independent reflections [*2*θ ≤ 54.236°] and 225 parameters.

## Computational details

### Optimisations and reaction coordinates

All calculations were performed using the Amsterdam Density Functional (ADF, version 2023.1) program as implemented in the Amsterdam Modeling Suite (AMS, version 2023.1).<sup>8</sup> All stationary points and energies were obtained using relativistic, dispersion-corrected density functional theory computations at the ZORA-BLYP-D3(BJ)/TZ2P level (see Cartesian coordinate list below). This approach comprises the BLYP level of the generalised gradient approximation (GGA), the exchange functional developed by Becke (B), and the GGA correlation functional developed by Lee, Yang, and Parr (LYP).<sup>9</sup> In addition, nonlocal dispersion interactions have been accounted for by the empirical DFT-D3(BJ) correction developed by Grimme and co-workers, which contains the damping function proposed by Becke and Johnson.<sup>10</sup> Scalar relativistic effects are accounted for using the zeroth-order regular approximation (ZORA).<sup>11</sup> This level has been proven to accurately describe bond activation by Group 10 metals<sup>12</sup> and bond energies of metal–metal complexes.<sup>13</sup> Solvation in benzene was simulated using the conductor-like screening model (COSMO).<sup>14</sup> Molecular orbitals (MO) were expanded into a large, uncontracted set of Slater-type orbitals (STOs): TZ2P.<sup>15</sup> This basis set is of triple- $\zeta$  quality for all atoms, augmented with polarisation functions, *i.e.*, one 2p and one 3d set on H; one 3d and one 4f set on C, Si, P, Cl; one 6p and one 5f set on Pt. All electrons were included in the variational process, *i.e.*, no frozen core approximation was used. For all calculations, the accuracies of both the Zlm fitting and the Becke integration grid were set to “Verygood”.<sup>16</sup> No symmetry constraints were used for the computations. Gibbs free energies  $G$  are calculated by adding thermal corrections computed at 298 K to the total electronic energy  $E$ ; zero-point vibrational energies and vibrational partition functions are computed using the vibrational frequencies computed at the same level.<sup>17</sup> All calculated stationary points have been verified by performing a vibrational analysis calculation to be energy minima (no imaginary frequencies) or transition states (only one imaginary frequency). The character of the normal mode associated with the imaginary frequency of the transition state has been inspected and the transition-state structures have been checked through an intrinsic reaction coordinate (IRC) calculation<sup>18</sup> to ensure that the transition state is associated with the reaction of interest. A list of the Cartesian coordinates and energies of all optimised structures can be found in Table S2. The ball-and-stick figures of the optimised structures were created using the CYLview20 software.<sup>19</sup>

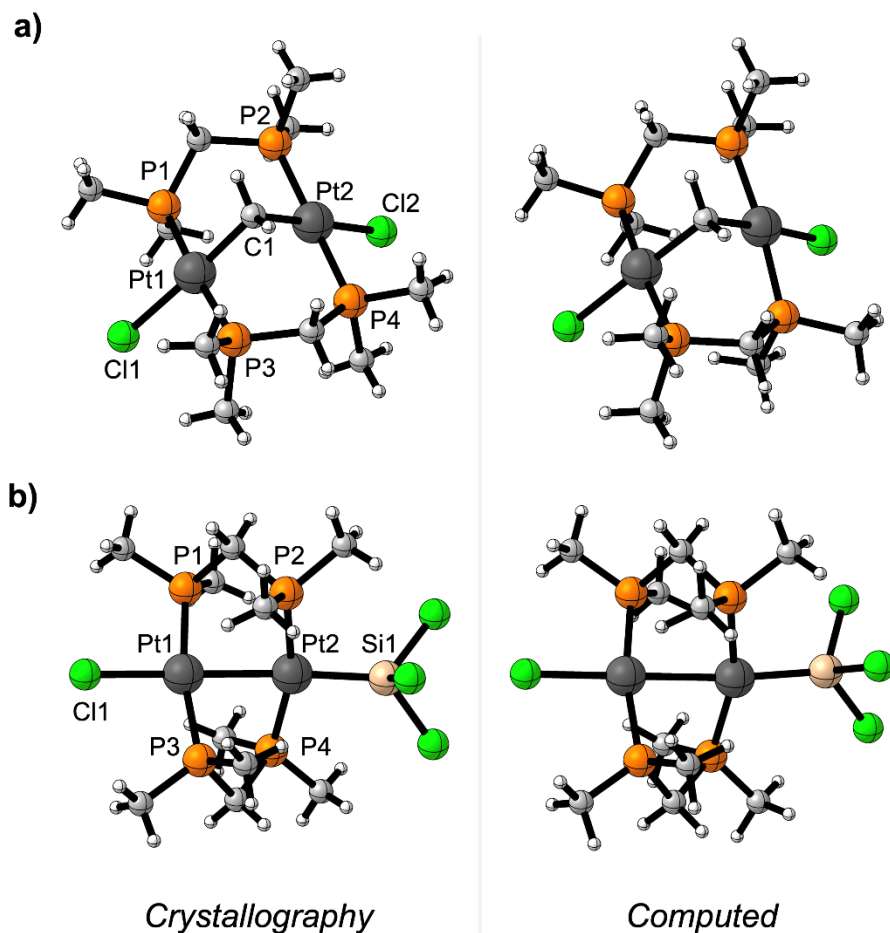

**Figure S78.** Agreement between SCXRD-derived (left) and computed (right) structures of **a)**  $2^{\text{CH}_2\text{-Cl}}$  and **b)**  $3^{\text{SiCl}_3\text{-Cl}}$ . Selected experimental (red) bond lengths (Å) and angles ( $^\circ$ ), with computed (blue) values at the COSMO(benzene)-ZORA-BLYP-D3(BJ)/TZ2P level in parentheses:  $2^{\text{CH}_2\text{-Cl}}$  | Pt1–Cl1 2.44 (2.51); Pt1–C1 2.05 (2.09); Pt1–Pt2 3.15 (3.19); Pt1–P1 2.29 (2.32); Pt1–P3 2.27 (2.29); Cl1–C1–Cl2 100 (96); P1–Pt1–P3 175 (174); P1–Pt1–Cl1 89 (87); P3–Pt1–Cl1 94 (94).  $3^{\text{SiCl}_3\text{-Cl}}$  | Pt1–Pt2 2.67 (2.73); Pt1–Cl1 2.42 (2.49); Pt2–Si1 2.29 (2.32); Pt1–P1 2.26 (2.29); Pt1–P3 2.27 (2.29); Pt2–P2 2.29 (2.33); Pt2–P4 2.29 (2.32); Cl1–Pt1–P1 96 (96); Cl1–Pt1–P3 95 (96); P1–Pt1–P3 169 (168); P2–Pt2–P4 164 (162); P2–Pt2–Si1 93 (95); P4–Pt2–Si1 103 (103).

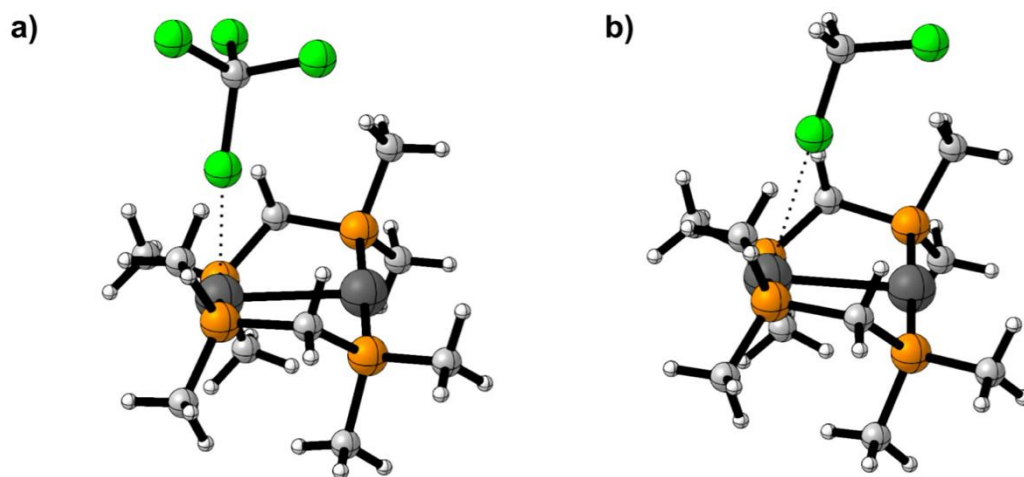

**Figure S79.** Ball-and-stick structures of the reactant complex (RC) for (a) CCl<sub>4</sub> and (b) CH<sub>2</sub>Cl<sub>2</sub> interacting with **1**, computed at the COSMO(benzene)-ZORA-BLYP-D3(BJ)/TZ2P level. Atom colours: H = white; C = grey; P = orange; Cl = green; Pt = anthracite.

## Energy decomposition analysis

The interaction energy  $\Delta E_{\text{int}}$  between the  $\text{SiCl}_4$  and  $[(\mu\text{-dmpm})_2\text{Pt}_2]$  molecules in the reactant complex (RC) and the first transition state (TS1) geometry of the A-frame (AF) and transannular (TA) pathway (see Figure 7 in the main text) was partitioned into four physically meaningful terms using a quantitative energy decomposition analysis (EDA):<sup>20</sup> (i) the classical electrostatic interaction ( $\Delta V_{\text{elstat}}$ ) between the molecules, (ii) the steric Pauli repulsion ( $\Delta E_{\text{Pauli}}$ ) arising from the repulsion between overlapping closed-shell orbitals on the interacting molecules, (iii) the orbital interaction ( $\Delta E_{\text{oi}}$ ) which accounts for charge transfer between the molecules (*i.e.*, donor–acceptor interactions, including HOMO–LUMO interactions) and the mutual polarisation of the molecules due to the presence of the other molecule, and (iv) the dispersion energy ( $\Delta E_{\text{disp}}$ ) (see Equation (S1) and the results in Table S1).

$$\Delta E_{\text{int}} = \Delta V_{\text{elstat}} + \Delta E_{\text{Pauli}} + \Delta E_{\text{oi}} + \Delta E_{\text{disp}} \quad (\text{S1})$$

**Table S1.** Energy decomposition analysis of the interaction energy  $\Delta E_{\text{int}}$  (in  $\text{kcal mol}^{-1}$ ) between the  $\text{SiCl}_4$  and  $[(\mu\text{-dmpm})_2\text{Pt}_2]$  molecules in the reactant complex (RC) and the first transition state (TS1) geometry of the A-frame (AF) and transannular (TA) pathway (see Figure 7 in the main text).<sup>[a,b]</sup>

|               | $\Delta E_{\text{int}}$ | $\Delta V_{\text{elstat}}$ | $\Delta E_{\text{Pauli}}$ | $\Delta E_{\text{oi}}$ | $\Delta E_{\text{disp}}$ |
|---------------|-------------------------|----------------------------|---------------------------|------------------------|--------------------------|
| <b>AF-RC</b>  | -108.4                  | -157.1                     | 250.5                     | -163.8                 | -38.0                    |
| <b>TA-RC</b>  | -112.9                  | -154.6                     | 229.7                     | -159.9                 | -28.1                    |
| <b>AF-TS1</b> | -125.6                  | -193.5                     | 300.9                     | -194.2                 | -38.8                    |
| <b>TA-TS1</b> | -121.4                  | -170.0                     | 251.5                     | -175.0                 | -27.9                    |

[a]  $\Delta E_{\text{int}} = \Delta V_{\text{elstat}} + \Delta E_{\text{Pauli}} + \Delta E_{\text{oi}} + \Delta E_{\text{disp}}$ . [b] Computed at ZORA-BLYP-D3(BJ)/TZ2P//COSMO(benzene)-ZORA-BLYP-D3(BJ)/TZ2P.

## Cartesian coordinates

**Table S2.** Cartesian coordinates (in Å), ADF total bond energies  $E$ , enthalpies  $H$ , Gibbs free energies  $G$  (in kcal mol<sup>-1</sup>), and the number of imaginary frequencies ( $N_{\text{imag}}$ ) of all reported structures, optimised at the COSMO(benzene)-ZORA-BLYP-D3(BJ)/TZ2P level of theory.

### 2<sup>CH2</sup>-Cl

$E$ : -5595.70

$H$ : -5333.52

$G$ : -5393.54

$N_{\text{imag}} = 0$

|    |             |             |            |
|----|-------------|-------------|------------|
| Pt | 2.73370593  | 9.49641768  | 6.72163965 |
| Pt | 3.09093720  | 10.26172323 | 3.64719298 |
| Cl | 2.43725284  | 7.37990718  | 8.03859478 |
| Cl | 3.28566098  | 9.00764610  | 1.48135752 |
| P  | 0.55114781  | 9.21383086  | 5.98258789 |
| P  | 0.88481049  | 10.80166884 | 3.32219515 |
| P  | 5.24398570  | 9.54175756  | 4.13229111 |
| P  | 4.96206779  | 9.69239211  | 7.23206490 |
| C  | 0.39380577  | 7.67010555  | 5.00111111 |
| H  | -0.62696007 | 7.53861510  | 4.62579569 |
| H  | 0.66535282  | 6.83712171  | 5.65558525 |
| H  | 1.10400273  | 7.70551457  | 4.17021724 |
| C  | -0.75300215 | 9.06013629  | 7.26745075 |
| H  | -1.72345054 | 8.81710575  | 6.82060693 |
| H  | -0.82575770 | 10.00065266 | 7.82199344 |
| H  | -0.44605567 | 8.26748980  | 7.95611656 |
| C  | -0.12391770 | 10.53196519 | 4.86440547 |
| H  | -1.16131170 | 10.30207671 | 4.59498464 |
| H  | -0.12372449 | 11.46566053 | 5.43642735 |
| C  | 0.51620419  | 12.55423500 | 2.89863794 |
| H  | -0.56424408 | 12.72908474 | 2.84646942 |
| H  | 0.97204558  | 12.77982723 | 1.92961181 |
| H  | 0.96172068  | 13.20601751 | 3.65564674 |
| C  | -0.02288165 | 9.85554438  | 2.03886898 |
| H  | -1.06828439 | 10.17944334 | 1.99259531 |
| H  | 0.02949170  | 8.78818356  | 2.26455467 |
| H  | 0.47003162  | 10.01899458 | 1.07707401 |
| C  | 6.55518496  | 9.94461697  | 2.91012091 |
| H  | 7.50442324  | 9.46538217  | 3.17430902 |

|   |            |             |            |
|---|------------|-------------|------------|
| H | 6.68753688 | 11.02999525 | 2.86750943 |
| H | 6.21438504 | 9.59211149  | 1.93219323 |
| C | 5.30229895 | 7.71113030  | 4.26099705 |
| H | 6.30896902 | 7.36110402  | 4.51440996 |
| H | 4.99400705 | 7.30507293  | 3.29352057 |
| H | 4.58383161 | 7.38701601  | 5.01911748 |
| C | 5.97552800 | 10.13143996 | 5.73248993 |
| H | 6.03495440 | 11.22314893 | 5.67225514 |
| H | 6.99476413 | 9.74422926  | 5.84587453 |
| C | 5.79678045 | 8.20091543  | 7.89902885 |
| H | 6.85822962 | 8.40427964  | 8.07771801 |
| H | 5.68672779 | 7.37321942  | 7.19495490 |
| H | 5.30093697 | 7.91618470  | 8.83058268 |
| C | 5.42306331 | 11.00939081 | 8.43204746 |
| H | 6.51083551 | 11.07756637 | 8.54498270 |
| H | 4.96758584 | 10.77242588 | 9.39852311 |
| H | 5.02533625 | 11.96647176 | 8.08250010 |
| C | 2.95122215 | 11.18119770 | 5.51304222 |
| H | 2.09359707 | 11.85505241 | 5.61582419 |
| H | 3.84658404 | 11.77393084 | 5.73023028 |

### **3<sup>CH2</sup>Cl-Cl**

*E*: -5573.17

*H*: -5311.47

*G*: -5374.07

*N*<sub>imag</sub> = 0

|    |            |             |            |
|----|------------|-------------|------------|
| Pt | 3.61928078 | 9.96983151  | 4.84528927 |
| Pt | 2.16135471 | 11.78844454 | 6.27323836 |
| C  | 0.99261485 | 13.07713086 | 7.44408857 |
| Cl | 4.95995679 | 8.25941254  | 3.54349062 |
| H  | 1.53261307 | 13.82012444 | 8.03255070 |
| Cl | 0.08224193 | 12.08098803 | 8.79472606 |
| H  | 0.16908027 | 13.56889921 | 6.92222269 |
| P  | 4.29496871 | 9.30549704  | 6.92411774 |
| P  | 4.17443162 | 12.28598482 | 7.24241966 |
| P  | 0.39718142 | 10.95405343 | 5.06912173 |
| P  | 2.62097427 | 10.95494730 | 3.04768928 |
| C  | 2.94474817 | 8.68553725  | 8.01366709 |
| H  | 2.19659036 | 9.47706390  | 8.12024135 |
| H  | 3.33627944 | 8.40001363  | 8.99685855 |

|   |             |             |            |
|---|-------------|-------------|------------|
| H | 2.47621884  | 7.81839313  | 7.53908510 |
| C | 5.60107926  | 8.02116421  | 7.09247342 |
| H | 5.24102912  | 7.09802627  | 6.62849786 |
| H | 5.84955957  | 7.84171086  | 8.14456459 |
| H | 6.48956463  | 8.34595050  | 6.54353453 |
| C | 4.96811941  | 10.74159819 | 7.90213044 |
| H | 6.05615842  | 10.79909781 | 7.78541204 |
| H | 4.74108389  | 10.62370565 | 8.96777111 |
| C | 5.43407477  | 12.94426947 | 6.07460875 |
| H | 5.56143630  | 12.21002287 | 5.27349322 |
| H | 6.38673739  | 13.12225370 | 6.58632669 |
| H | 5.06679830  | 13.87971345 | 5.64210821 |
| C | 4.26422137  | 13.45307224 | 8.66648965 |
| H | 3.94651774  | 14.44834045 | 8.33911892 |
| H | 5.28445910  | 13.51204809 | 9.06102055 |
| H | 3.58581371  | 13.11167529 | 9.45459018 |
| C | -1.26377215 | 11.74189013 | 5.18514486 |
| H | -1.19182579 | 12.79001084 | 4.87848055 |
| H | -1.59668685 | 11.70321219 | 6.22717051 |
| H | -1.98906479 | 11.22489518 | 4.54749816 |
| C | 0.04755376  | 9.18793983  | 5.44003080 |
| H | -0.78357273 | 8.81719651  | 4.82959989 |
| H | -0.20198528 | 9.09562070  | 6.50114689 |
| H | 0.95685771  | 8.61520136  | 5.23584455 |
| C | 0.76811290  | 10.95712483 | 3.24832035 |
| H | 0.32635870  | 11.83899978 | 2.77031890 |
| H | 0.34314326  | 10.06293831 | 2.77863201 |
| C | 3.00178687  | 12.74251791 | 2.81635551 |
| H | 4.07761049  | 12.85568490 | 2.65212403 |
| H | 2.72887866  | 13.26848184 | 3.73651421 |
| H | 2.45307696  | 13.15659081 | 1.96252544 |
| C | 2.86654572  | 10.24966384 | 1.36635233 |
| H | 2.27653526  | 10.78978779 | 0.61727863 |
| H | 2.58341271  | 9.19338655  | 1.38210329 |
| H | 3.93070883  | 10.30607747 | 1.11825139 |

**2<sup>CCl2</sup>-Cl**

*E*: -5523.80

*H*: -5271.60

*G*: -5335.32

$N_{imag} = 0$

|    |            |             |            |
|----|------------|-------------|------------|
| Pt | 2.03433589 | 8.58743482  | 5.99136815 |
| Pt | 2.98327592 | 10.77370169 | 3.86163037 |
| Cl | 2.94430707 | 7.28898248  | 7.90290583 |
| Cl | 4.87636335 | 12.33149094 | 3.46437493 |
| P  | 3.62997091 | 7.35375515  | 4.73846588 |
| P  | 3.83724089 | 9.30444003  | 2.29029461 |
| P  | 2.62412188 | 12.12189057 | 5.78285692 |
| P  | 0.97859376 | 10.03770955 | 7.45375134 |
| C  | 5.29878256 | 7.84106457  | 5.33388498 |
| H  | 6.08010353 | 7.28726971  | 4.80213719 |
| H  | 5.35268169 | 7.63723755  | 6.40570489 |
| H  | 5.42483397 | 8.91564484  | 5.17150015 |
| C  | 3.57759089 | 5.52634482  | 4.90936326 |
| H  | 4.44099814 | 5.06396068  | 4.41872539 |
| H  | 2.65319114 | 5.15753582  | 4.45438630 |
| H  | 3.57298740 | 5.28390513  | 5.97484615 |
| C  | 3.79914329 | 7.54733082  | 2.89759462 |
| H  | 4.72691905 | 7.04952841  | 2.59167180 |
| H  | 2.95597660 | 7.03526455  | 2.43390592 |
| C  | 3.07367188 | 9.24936249  | 0.62066821 |
| H  | 3.52737389 | 8.45504240  | 0.01774589 |
| H  | 3.24609615 | 10.21777985 | 0.14038912 |
| H  | 2.00010752 | 9.07925731  | 0.71890151 |
| C  | 5.61813310 | 9.53929754  | 1.91039222 |
| H  | 5.94767395 | 8.75281055  | 1.22268521 |
| H  | 6.20171594 | 9.49856078  | 2.83282658 |
| H  | 5.76291185 | 10.52312346 | 1.46016556 |
| C  | 2.47539379 | 13.93039842 | 5.50276983 |
| H  | 2.46509189 | 14.47298562 | 6.45433546 |
| H  | 1.54742582 | 14.12553769 | 4.95650928 |
| H  | 3.32334959 | 14.25156354 | 4.89296237 |
| C  | 4.08590968 | 11.92641486 | 6.87906610 |
| H  | 3.98505668 | 12.54424667 | 7.77795632 |
| H  | 4.97643403 | 12.21738495 | 6.31734102 |
| H  | 4.17208555 | 10.87181506 | 7.15726772 |
| C  | 1.21371790 | 11.81317523 | 6.95366939 |
| H  | 0.30181003 | 12.16414466 | 6.47061009 |
| H  | 1.38929595 | 12.41189005 | 7.85524879 |
| C  | 1.65239808 | 10.02864103 | 9.16160228 |
| H  | 1.14559925 | 10.79822655 | 9.75402148 |

|    |             |             |            |
|----|-------------|-------------|------------|
| H  | 2.72700308  | 10.22285731 | 9.13628421 |
| H  | 1.49581153  | 9.04335101  | 9.60462970 |
| C  | -0.82760026 | 9.85446555  | 7.73280726 |
| H  | -1.19894096 | 10.65641830 | 8.38030765 |
| H  | -0.99624225 | 8.88638859  | 8.21512088 |
| H  | -1.34633050 | 9.87659743  | 6.77283963 |
| C  | 1.40921115  | 9.57925362  | 4.33242141 |
| Cl | 0.74392015  | 8.28434339  | 3.05083816 |
| Cl | -0.19694122 | 10.66707819 | 4.38744865 |

### **3<sup>CCl3</sup>-Cl**

*E*: -5498.31

*H*: -5247.53

*G*: -5310.88

$N_{imag} = 0$

|    |             |             |            |
|----|-------------|-------------|------------|
| Pt | 3.51628201  | 10.02813865 | 4.92624446 |
| Pt | 2.02687028  | 11.83218342 | 6.35527223 |
| C  | 0.99651499  | 13.20228570 | 7.58588865 |
| Cl | 4.88092215  | 8.38614451  | 3.64233817 |
| Cl | 1.64154702  | 14.96318476 | 7.39633976 |
| Cl | 1.22534431  | 12.75622556 | 9.41199847 |
| Cl | -0.84415445 | 13.40786147 | 7.43684910 |
| P  | 4.15667585  | 9.28386859  | 6.99701708 |
| P  | 4.14911778  | 12.28123213 | 7.21599148 |
| P  | 0.35309064  | 10.87982191 | 5.05508549 |
| P  | 2.63428723  | 11.08006402 | 3.09917571 |
| C  | 2.80401746  | 8.70973134  | 8.10355885 |
| H  | 2.07813796  | 9.52193341  | 8.20750581 |
| H  | 3.19868763  | 8.42863871  | 9.08635899 |
| H  | 2.30992230  | 7.84778430  | 7.64587734 |
| C  | 5.42939417  | 7.96790801  | 7.14129744 |
| H  | 5.03407642  | 7.04890029  | 6.69835636 |
| H  | 5.69710676  | 7.79387127  | 8.18932989 |
| H  | 6.31183464  | 8.26436628  | 6.56771920 |
| C  | 4.87487032  | 10.72319219 | 7.92244003 |
| H  | 5.96482679  | 10.73922391 | 7.80968181 |
| H  | 4.63864124  | 10.66043149 | 8.99058925 |
| C  | 5.35868793  | 12.79481463 | 5.92686712 |
| H  | 5.40418019  | 12.01798522 | 5.15835284 |
| H  | 6.34627448  | 12.95278140 | 6.37432845 |

|   |             |             |            |
|---|-------------|-------------|------------|
| H | 5.00871342  | 13.72696976 | 5.47361621 |
| C | 4.51755167  | 13.49654159 | 8.55309346 |
| H | 4.29459071  | 14.50557145 | 8.20088259 |
| H | 5.57916943  | 13.42027472 | 8.81423253 |
| H | 3.90022088  | 13.28843958 | 9.42830251 |
| C | -1.42181767 | 11.38670482 | 5.00956393 |
| H | -1.50400668 | 12.45386252 | 4.79386190 |
| H | -1.89213631 | 11.18849807 | 5.97493746 |
| H | -1.92648635 | 10.80828367 | 4.22689459 |
| C | 0.18963530  | 9.06370905  | 5.31995453 |
| H | -0.57506407 | 8.64842858  | 4.65415574 |
| H | -0.09533124 | 8.88628618  | 6.36125157 |
| H | 1.15959247  | 8.59513279  | 5.13058658 |
| C | 0.78767526  | 11.02633764 | 3.25117344 |
| H | 0.33066383  | 11.93029697 | 2.83279844 |
| H | 0.39142087  | 10.15938151 | 2.71023704 |
| C | 2.99265924  | 12.87850117 | 2.95440905 |
| H | 4.07159278  | 13.01962129 | 2.84248483 |
| H | 2.66501806  | 13.36838941 | 3.87642803 |
| H | 2.47416403  | 13.31067554 | 2.09118516 |
| C | 2.97382251  | 10.43027564 | 1.41535101 |
| H | 2.40443918  | 10.98150860 | 0.65880581 |
| H | 2.71441238  | 9.36840876  | 1.38698509 |
| H | 4.04584595  | 10.51954220 | 1.21563088 |

## $2^{\text{SiCl}_2\text{-Cl}}$

*E*: -5538.09

*H*: -5286.25

*G*: -5350.78

$N_{\text{imag}} = 0$

|    |            |             |            |
|----|------------|-------------|------------|
| Pt | 2.03963015 | 8.50025416  | 6.10364108 |
| Pt | 3.06797193 | 10.86921351 | 3.79939918 |
| Cl | 3.13524079 | 7.31086093  | 8.04067538 |
| Cl | 5.09958973 | 12.34532352 | 3.55278252 |
| P  | 3.62366668 | 7.36248603  | 4.77661528 |
| P  | 3.87196964 | 9.31960941  | 2.29156097 |
| P  | 2.65518987 | 12.11466061 | 5.75977633 |
| P  | 0.99904807 | 10.02795314 | 7.48380086 |
| C  | 5.28452657 | 7.92360629  | 5.32463151 |
| H  | 6.07013119 | 7.41741287  | 4.75336100 |

|    |             |             |            |
|----|-------------|-------------|------------|
| H  | 5.38482643  | 7.70210339  | 6.38943015 |
| H  | 5.35355627  | 9.00550611  | 5.17837248 |
| C  | 3.65687684  | 5.53451048  | 4.93892530 |
| H  | 4.53267855  | 5.11128233  | 4.43541416 |
| H  | 2.74297605  | 5.12287916  | 4.49987318 |
| H  | 3.68089153  | 5.29468697  | 6.00530800 |
| C  | 3.72325330  | 7.57569948  | 2.93083563 |
| H  | 4.58825160  | 7.00255482  | 2.57680326 |
| H  | 2.81960088  | 7.13635317  | 2.50485443 |
| C  | 3.14092548  | 9.24121273  | 0.60881818 |
| H  | 3.58674235  | 8.42260363  | 0.03335170 |
| H  | 3.34343496  | 10.19360922 | 0.10891781 |
| H  | 2.06166697  | 9.09710074  | 0.68721094 |
| C  | 5.66920979  | 9.46887777  | 1.95018109 |
| H  | 5.98438474  | 8.65602450  | 1.28691927 |
| H  | 6.22989668  | 9.43004696  | 2.88616326 |
| H  | 5.85931407  | 10.43760831 | 1.48303696 |
| C  | 2.54901046  | 13.93579808 | 5.55774353 |
| H  | 2.54143900  | 14.43927548 | 6.53042994 |
| H  | 1.63433106  | 14.17870605 | 5.00839024 |
| H  | 3.41424598  | 14.25741411 | 4.97191384 |
| C  | 4.08328215  | 11.83746064 | 6.88109601 |
| H  | 3.95997046  | 12.40509195 | 7.80972044 |
| H  | 4.99100885  | 12.15060792 | 6.36063612 |
| H  | 4.15108030  | 10.76827050 | 7.10230910 |
| C  | 1.20506463  | 11.77737179 | 6.87609737 |
| H  | 0.30279620  | 12.05220815 | 6.32713119 |
| H  | 1.29652044  | 12.43735329 | 7.74680010 |
| C  | 1.70186168  | 10.10739835 | 9.17750271 |
| H  | 1.20361366  | 10.90203534 | 9.74341730 |
| H  | 2.77557121  | 10.29834435 | 9.12591879 |
| H  | 1.55409886  | 9.14152787  | 9.66541834 |
| C  | -0.80390279 | 9.87281768  | 7.79594136 |
| H  | -1.15883534 | 10.69935495 | 8.42114410 |
| H  | -0.97556813 | 8.92288969  | 8.31184641 |
| H  | -1.33908172 | 9.86857885  | 6.84449267 |
| Si | 1.22841728  | 9.56344746  | 4.23522839 |
| Cl | 0.48015813  | 8.15823370  | 2.77290336 |
| Cl | -0.58691943 | 10.73477153 | 4.31273193 |

**$3^{\text{SiCl}_3\text{-Cl}}$** *E*: -5530.50*H*: -5280.06*G*: -5344.97 $N_{\text{imag}} = 0$ 

|    |             |             |            |
|----|-------------|-------------|------------|
| Pt | 3.54722746  | 9.98675809  | 4.89954614 |
| Pt | 2.06636800  | 11.79940812 | 6.30744131 |
| Si | 0.92030523  | 13.29369452 | 7.66547446 |
| Cl | 4.89416874  | 8.31947912  | 3.63127544 |
| Cl | 1.59137757  | 15.33196122 | 7.53527075 |
| Cl | 1.15149760  | 12.83141063 | 9.75689067 |
| Cl | -1.19644947 | 13.59537602 | 7.59234207 |
| P  | 4.17964733  | 9.27465275  | 6.98307102 |
| P  | 4.16334470  | 12.27016820 | 7.19820828 |
| P  | 0.37045963  | 10.87631845 | 5.02284920 |
| P  | 2.65491100  | 11.02897791 | 3.07095278 |
| C  | 2.81888280  | 8.72182676  | 8.09093971 |
| H  | 2.09827620  | 9.53991031  | 8.18747565 |
| H  | 3.20801557  | 8.44562498  | 9.07726542 |
| H  | 2.31859705  | 7.86057000  | 7.63884704 |
| C  | 5.44492766  | 7.95445633  | 7.15046175 |
| H  | 5.04634339  | 7.03222053  | 6.71724712 |
| H  | 5.70730323  | 7.79200138  | 8.20164769 |
| H  | 6.33135283  | 8.23900312  | 6.57693251 |
| C  | 4.90127793  | 10.71860276 | 7.90118878 |
| H  | 5.98969623  | 10.74107794 | 7.77597597 |
| H  | 4.67811226  | 10.65463749 | 8.97202086 |
| C  | 5.36836202  | 12.81256313 | 5.91946035 |
| H  | 5.43615647  | 12.03599730 | 5.15245477 |
| H  | 6.34829176  | 12.99240615 | 6.37522581 |
| H  | 5.00167972  | 13.73665492 | 5.46319258 |
| C  | 4.46589805  | 13.48793982 | 8.54300944 |
| H  | 4.18902830  | 14.48693558 | 8.19825015 |
| H  | 5.52749991  | 13.46914758 | 8.81314000 |
| H  | 3.85478161  | 13.23956365 | 9.41313697 |
| C  | -1.36959678 | 11.47093257 | 5.01909088 |
| H  | -1.39769712 | 12.54162405 | 4.80432950 |
| H  | -1.81892828 | 11.30611107 | 6.00073960 |
| H  | -1.93377969 | 10.92258270 | 4.25616335 |
| C  | 0.15793980  | 9.07332735  | 5.32031105 |
| H  | -0.63023340 | 8.67147627  | 4.67402830 |

|   |             |             |            |
|---|-------------|-------------|------------|
| H | -0.11347865 | 8.91935067  | 6.36878347 |
| H | 1.11070902  | 8.57473433  | 5.12087826 |
| C | 0.80531483  | 10.98757292 | 3.21888479 |
| H | 0.35488620  | 11.88530871 | 2.78064888 |
| H | 0.40512135  | 10.11215494 | 2.69494316 |
| C | 3.01647678  | 12.82638499 | 2.91672329 |
| H | 4.09631545  | 12.96530163 | 2.81158003 |
| H | 2.68381522  | 13.32527427 | 3.83232734 |
| H | 2.50469661  | 13.25375012 | 2.04716102 |
| C | 2.98937034  | 10.37097361 | 1.38941160 |
| H | 2.41972449  | 10.91937502 | 0.63108200 |
| H | 2.72848977  | 9.30931683  | 1.36676283 |
| H | 4.06123828  | 10.45775220 | 1.18764493 |

#### SiCl<sub>4</sub>

*E*: -409.91

*H*: -400.89

*G*: -425.88

*N*<sub>imag</sub> = 0

|    |             |             |             |
|----|-------------|-------------|-------------|
| Cl | -1.67406544 | -0.00000000 | -0.58837899 |
| Si | 0.00000000  | -0.00000000 | 0.59542965  |
| Cl | 0.00000000  | -1.67404494 | 1.77926093  |
| Cl | -0.00000000 | 1.67404494  | 1.77926093  |
| Cl | 1.67406544  | 0.00000000  | -0.58837899 |

#### 1

*E*: -9471.90

*H*: -9036.15

*G*: -9107.43

*N*<sub>imag</sub> = 0

|    |            |            |            |
|----|------------|------------|------------|
| Pt | 5.42674799 | 4.45340225 | 4.07981613 |
| C  | 3.23237674 | 7.24170143 | 4.11946564 |
| H  | 2.36408530 | 6.77926945 | 4.60480283 |
| H  | 2.87797575 | 8.07300176 | 3.49765248 |
| P  | 4.37475941 | 7.92038446 | 5.42480866 |
| C  | 4.66507306 | 7.05710713 | 1.66618838 |
| H  | 3.84825745 | 7.65307611 | 1.24126920 |
| H  | 5.11159477 | 6.43878802 | 0.88228566 |
| H  | 5.42844645 | 7.72178571 | 2.07742018 |

|    |            |             |            |
|----|------------|-------------|------------|
| C  | 3.42860175 | 9.41956660  | 5.96708537 |
| H  | 3.92797342 | 9.85391752  | 6.83964802 |
| H  | 2.39079365 | 9.17631941  | 6.22617244 |
| H  | 3.44679798 | 10.15794810 | 5.16009848 |
| C  | 4.00222804 | 6.76101690  | 6.81782201 |
| H  | 4.54417235 | 7.08095746  | 7.71230794 |
| H  | 4.34325335 | 5.76404532  | 6.52899771 |
| H  | 2.92678990 | 6.73462211  | 7.03151629 |
| C  | 2.57507820 | 5.20132423  | 2.22173950 |
| H  | 1.91644018 | 5.95518651  | 1.77313948 |
| H  | 2.02372287 | 4.62407624  | 2.96977152 |
| H  | 2.92010836 | 4.51206274  | 1.44374138 |
| P  | 4.05359965 | 5.97069486  | 3.03340169 |
| C  | 5.53219653 | 2.72459402  | 5.36135798 |
| H  | 6.07038609 | 2.87127152  | 6.29871525 |
| C  | 5.61018962 | 1.32846526  | 4.72319780 |
| H  | 6.61139779 | 0.98374219  | 4.44731396 |
| C  | 4.84418744 | 0.36575989  | 5.69405054 |
| H  | 5.20062453 | 0.46354754  | 6.72549806 |
| H  | 4.97701135 | -0.68051313 | 5.39110519 |
| C  | 3.34547144 | 0.81632747  | 5.52701272 |
| H  | 2.72817322 | -0.00444411 | 5.14051897 |
| H  | 2.90034387 | 1.15512752  | 6.46912352 |
| C  | 3.44332867 | 1.97985073  | 4.48164719 |
| H  | 2.49658793 | 2.22064659  | 3.98861749 |
| C  | 4.13892202 | 3.14349437  | 5.20595508 |
| H  | 3.59155239 | 3.61652973  | 6.02231178 |
| C  | 4.57793285 | 1.44133575  | 3.56938102 |
| H  | 4.87919893 | 2.15737942  | 2.79771812 |
| H  | 4.33657542 | 0.47096140  | 3.11763869 |
| Pt | 6.53107393 | 8.37556144  | 4.77219343 |
| C  | 8.72544611 | 5.58726656  | 4.73255996 |
| H  | 9.59373811 | 6.04969741  | 4.24722271 |
| H  | 9.07984620 | 4.75596672  | 5.35437429 |
| P  | 7.58306503 | 4.90858672  | 3.42721377 |
| C  | 7.29275540 | 5.77187900  | 7.18584369 |
| H  | 8.10957238 | 5.17591422  | 7.61076613 |
| H  | 6.84623559 | 6.39020515  | 7.96974195 |
| H  | 6.52938122 | 5.10719651  | 6.77461992 |
| C  | 8.52922532 | 3.40940890  | 2.88492963 |
| H  | 8.02985593 | 2.97506291  | 2.01236321 |

|   |             |             |            |
|---|-------------|-------------|------------|
| H | 9.56703371  | 3.65265877  | 2.62584626 |
| H | 8.51102812  | 2.67102229  | 3.69191183 |
| C | 7.95559840  | 6.06796507  | 2.03420986 |
| H | 7.41365611  | 5.74803068  | 1.13972051 |
| H | 7.61457181  | 7.06493444  | 2.32304065 |
| H | 9.03103694  | 6.09436226  | 1.82051792 |
| C | 9.38274807  | 7.62765606  | 6.63027065 |
| H | 10.04138746 | 6.87379759  | 7.07887506 |
| H | 9.93410131  | 8.20489815  | 5.88223252 |
| H | 9.03771971  | 8.31692372  | 7.40826409 |
| P | 7.90422471  | 6.85827854  | 5.81861849 |
| C | 6.42561821  | 10.10435523 | 3.49063351 |
| H | 5.88742112  | 9.95766803  | 2.55328205 |
| C | 6.34763161  | 11.50049118 | 4.12877900 |
| H | 5.34642584  | 11.84521695 | 4.40466848 |
| C | 7.11362614  | 12.46318478 | 3.15790836 |
| H | 6.75717991  | 12.36538504 | 2.12646519 |
| H | 6.98080676  | 13.50946185 | 3.46084156 |
| C | 8.61234318  | 12.01261733 | 3.32493825 |
| H | 9.22964556  | 12.83339326 | 3.71141646 |
| H | 9.05746077  | 11.67380561 | 2.38282687 |
| C | 8.51449415  | 10.84910646 | 4.37031848 |
| H | 9.46123894  | 10.60831559 | 4.86334290 |
| C | 7.81889354  | 9.68545494  | 3.64603029 |
| H | 8.36625596  | 9.21240914  | 2.82967473 |
| C | 7.37989834  | 11.38763306 | 5.28258808 |
| H | 7.07863829  | 10.67159848 | 6.05426174 |
| H | 7.62126040  | 12.35801241 | 5.73431722 |

**nbe**

*E*: -2186.36

*H*: -2089.54

*G*: -2111.49

*N*<sub>imag</sub> = 0

|   |            |            |            |
|---|------------|------------|------------|
| C | 5.39295722 | 2.47205323 | 5.37969741 |
| C | 5.54058715 | 1.10560875 | 4.71377454 |
| H | 6.16580969 | 2.95921913 | 5.96815746 |
| C | 4.11227041 | 2.85760127 | 5.23764084 |
| C | 4.52308960 | 1.25296514 | 3.54608598 |
| C | 4.76351673 | 0.08722254 | 5.63623201 |

|   |            |             |            |
|---|------------|-------------|------------|
| H | 6.55698324 | 0.79632738  | 4.45941273 |
| C | 3.38016823 | 1.75597353  | 4.47415857 |
| H | 3.63124306 | 3.72221685  | 5.68703980 |
| H | 4.83005006 | 2.00051582  | 2.80735297 |
| H | 4.29259712 | 0.30357080  | 3.04757766 |
| C | 3.27081408 | 0.53658832  | 5.47068124 |
| H | 5.10990599 | 0.13607326  | 6.67286442 |
| H | 4.91164724 | -0.93715607 | 5.27606668 |
| H | 2.43576643 | 2.03693233  | 4.00235833 |
| H | 2.80727400 | 0.82926898  | 6.41749498 |
| H | 2.66355292 | -0.26042093 | 5.02678618 |

### TA-RC

*E*: -5507.85

*H*: -5256.74

*G*: -5323.2

$N_{\text{imag}} = 0$

|    |            |             |            |
|----|------------|-------------|------------|
| Pt | 2.45867485 | 12.60823860 | 4.88206230 |
| Pt | 2.86875979 | 10.32267920 | 6.44405872 |
| Cl | 1.55381290 | 7.93241299  | 9.39721057 |
| Si | 3.06471996 | 8.69694372  | 8.10955823 |
| Cl | 4.90323719 | 7.89568074  | 8.84842371 |
| H  | 0.21454973 | 15.45385164 | 5.95974142 |
| Cl | 3.29451285 | 10.61106398 | 9.56640603 |
| P  | 4.18836814 | 11.86287883 | 3.60719239 |
| P  | 5.16884882 | 10.41840806 | 6.12484633 |
| P  | 0.57530854 | 10.11369350 | 6.13458635 |
| P  | 0.79390891 | 13.13012237 | 6.37003484 |
| C  | 3.93642064 | 10.25527785 | 2.74736174 |
| H  | 3.55857224 | 9.52631482  | 3.46967784 |
| H  | 4.86898670 | 9.89589476  | 2.29844847 |
| H  | 3.18399800 | 10.39119853 | 1.96455214 |
| C  | 4.89331282 | 12.94185263 | 2.29035603 |
| H  | 4.12901209 | 13.11815302 | 1.52670521 |
| H  | 5.76890924 | 12.47182621 | 1.82792432 |
| H  | 5.18050910 | 13.90297364 | 2.72702259 |
| C  | 5.62397492 | 11.57090939 | 4.73243247 |
| H  | 5.86840524 | 12.54276479 | 5.17402013 |
| H  | 6.50470063 | 11.19431773 | 4.19792108 |
| C  | 6.23830971 | 11.00887704 | 7.49173950 |

|    |             |             |            |
|----|-------------|-------------|------------|
| H  | 5.89357040  | 12.00069589 | 7.79685628 |
| H  | 7.28300507  | 11.05381599 | 7.16509929 |
| H  | 6.13462710  | 10.33018923 | 8.34045057 |
| C  | 5.93020218  | 8.84171015  | 5.56758345 |
| H  | 5.79677712  | 8.08312111  | 6.33994136 |
| H  | 6.99711471  | 8.99180152  | 5.36881045 |
| H  | 5.42682785  | 8.50300122  | 4.65892857 |
| C  | -0.47642594 | 8.80298027  | 6.86874874 |
| H  | -0.52424046 | 8.92447854  | 7.95155674 |
| H  | -0.03275677 | 7.82849488  | 6.64875302 |
| H  | -1.48113897 | 8.86766313  | 6.43667034 |
| C  | 0.24531944  | 9.89876314  | 4.33645389 |
| H  | -0.83345561 | 9.86452908  | 4.14716997 |
| H  | 0.70704122  | 8.96072248  | 4.01487644 |
| H  | 0.70445721  | 10.73117376 | 3.79447714 |
| C  | -0.33842958 | 11.66917223 | 6.57492990 |
| H  | -0.68083890 | 11.60292444 | 7.61353820 |
| H  | -1.21501124 | 11.78037773 | 5.92665807 |
| C  | 1.35801541  | 13.47435586 | 8.08125357 |
| H  | 2.01162017  | 14.35193991 | 8.06848355 |
| H  | 1.92903909  | 12.61454648 | 8.44722339 |
| H  | 0.50088533  | 13.66208041 | 8.73796800 |
| C  | -0.35656232 | 14.52056290 | 5.99362874 |
| H  | -1.13469141 | 14.59867174 | 6.76148096 |
| H  | -0.81937724 | 14.35624606 | 5.01593192 |
| Cl | 2.79616730  | 6.97363433  | 6.59282307 |

### TA-TS1

*E*: -5507.52

*H*: -5257.01

*G*: -5322.33

$N_{\text{imag}} = 1$  ( $-62.3775 \text{ cm}^{-1}$ )

|    |            |             |            |
|----|------------|-------------|------------|
| Pt | 1.27663297 | 10.08057049 | 6.29904631 |
| Pt | 3.48944620 | 11.63786516 | 5.63595200 |
| Si | 5.37077404 | 12.97549991 | 5.49278376 |
| Cl | 4.11947150 | 13.80136456 | 7.77234517 |
| Cl | 5.34820036 | 15.00451567 | 4.86960895 |
| Cl | 6.26890420 | 12.15339563 | 3.63681599 |
| Cl | 7.09533682 | 12.81013344 | 6.70310358 |
| P  | 0.46553067 | 10.63601670 | 4.24606149 |

|   |             |             |             |
|---|-------------|-------------|-------------|
| P | 2.16507605  | 13.17025788 | 4.48221252  |
| P | 4.59810652  | 9.71596037  | 6.31346564  |
| P | 2.30873373  | 9.67714875  | 8.31159680  |
| C | 1.44746873  | 10.05986818 | 2.80032885  |
| H | 2.49317473  | 10.33949358 | 2.95686521  |
| H | 1.07186919  | 10.49759768 | 1.86874833  |
| H | 1.38314684  | 8.96904568  | 2.74290957  |
| C | -1.26210844 | 10.18034053 | 3.79618501  |
| H | -1.35089537 | 9.08933990  | 3.78028817  |
| H | -1.52749093 | 10.58171784 | 2.81136384  |
| H | -1.94783737 | 10.57687192 | 4.55082812  |
| C | 0.47547637  | 12.47617922 | 4.10643978  |
| H | -0.21088566 | 12.84660870 | 4.87506630  |
| H | 0.12717604  | 12.82302336 | 3.12601299  |
| C | 1.76100904  | 14.76886646 | 5.28006100  |
| H | 1.28730863  | 14.56023314 | 6.24300179  |
| H | 1.09053472  | 15.35362056 | 4.64063661  |
| H | 2.68668923  | 15.31520406 | 5.46791704  |
| C | 2.77073728  | 13.60730470 | 2.80213306  |
| H | 3.73663703  | 14.10815144 | 2.88384963  |
| H | 2.05157591  | 14.26589984 | 2.30276644  |
| H | 2.90111022  | 12.69128938 | 2.22034403  |
| C | 6.42190746  | 9.51279025  | 6.34069736  |
| H | 6.86179004  | 10.17699271 | 7.08511286  |
| H | 6.82468515  | 9.77781145  | 5.35927516  |
| H | 6.66279947  | 8.47024192  | 6.57547670  |
| C | 4.08702991  | 8.28300480  | 5.27629164  |
| H | 4.54149852  | 7.35931121  | 5.65218015  |
| H | 4.41971764  | 8.46618881  | 4.25039644  |
| H | 2.99514741  | 8.20954883  | 5.29123164  |
| C | 4.09845373  | 9.23392034  | 8.03182209  |
| H | 4.72519993  | 9.78540538  | 8.74086825  |
| H | 4.25609724  | 8.16064723  | 8.18791339  |
| C | 2.38548465  | 11.09120801 | 9.47222906  |
| H | 1.36505114  | 11.39335176 | 9.72799924  |
| H | 2.89195191  | 11.92716688 | 8.97425873  |
| H | 2.92741116  | 10.81121642 | 10.38286871 |
| C | 1.67589800  | 8.28181636  | 9.33748506  |
| H | 2.29292173  | 8.15097020  | 10.23373693 |
| H | 1.68415214  | 7.36072583  | 8.74700269  |
| H | 0.64529368  | 8.49963805  | 9.63523286  |

**TA-I***E*: -5512.67*H*: -5262.32*G*: -5325.28 $N_{\text{imag}} = 0$ 

|    |             |             |            |
|----|-------------|-------------|------------|
| Pt | 2.42664803  | 12.29226589 | 4.67833136 |
| Pt | 2.83124684  | 9.93958916  | 6.45611370 |
| Si | 2.72190992  | 7.73710365  | 6.98855908 |
| Cl | 3.43643506  | 12.10983065 | 8.06402174 |
| Cl | 4.38442676  | 6.43324568  | 6.75599690 |
| Cl | 1.19856533  | 6.58342430  | 6.04065064 |
| Cl | 2.33211056  | 7.44853115  | 9.05953221 |
| P  | 4.53583539  | 12.08449407 | 3.89537744 |
| P  | 5.11673925  | 9.91695495  | 5.99132571 |
| P  | 0.51705168  | 10.15606118 | 6.74257719 |
| P  | 0.60276067  | 13.03915636 | 5.81453048 |
| C  | 4.98452203  | 11.03942089 | 2.44111753 |
| H  | 4.54157978  | 10.04699225 | 2.54050571 |
| H  | 6.07060290  | 10.95431062 | 2.32206046 |
| H  | 4.55941201  | 11.51418717 | 1.55079607 |
| C  | 5.29993715  | 13.70127552 | 3.44070567 |
| H  | 4.76592846  | 14.12016531 | 2.58213580 |
| H  | 6.35874482  | 13.57307310 | 3.18565770 |
| H  | 5.20429383  | 14.38985822 | 4.28477587 |
| C  | 5.63544082  | 11.53434321 | 5.27968452 |
| H  | 5.49054179  | 12.27235107 | 6.07691281 |
| H  | 6.69156375  | 11.49929874 | 4.98391551 |
| C  | 6.18143267  | 9.73181167  | 7.47077485 |
| H  | 5.88241234  | 10.49585105 | 8.19324674 |
| H  | 7.23733569  | 9.84635830  | 7.20286792 |
| H  | 6.01583644  | 8.74029580  | 7.90100556 |
| C  | 5.81086867  | 8.71361397  | 4.77793141 |
| H  | 6.02582389  | 7.77270014  | 5.28206576 |
| H  | 6.73265103  | 9.11997676  | 4.34991151 |
| H  | 5.08866129  | 8.52090154  | 3.98302992 |
| C  | -0.38997400 | 9.22833174  | 8.04364040 |
| H  | 0.05720084  | 9.44281698  | 9.01707831 |
| H  | -0.33508213 | 8.15489027  | 7.85703631 |
| H  | -1.43760748 | 9.54837653  | 8.03704205 |

|   |             |             |            |
|---|-------------|-------------|------------|
| C | -0.42008294 | 9.77817049  | 5.21010602 |
| H | -1.48079927 | 10.02129677 | 5.33641008 |
| H | -0.30793661 | 8.71325606  | 4.99398510 |
| H | 0.01100962  | 10.35279837 | 4.38575173 |
| C | 0.07912844  | 11.89175880 | 7.16894794 |
| H | 0.67522869  | 12.14227788 | 8.05292257 |
| H | -0.98939524 | 11.98268810 | 7.39615920 |
| C | 0.92863182  | 14.61045626 | 6.71254196 |
| H | 1.15015588  | 15.39940487 | 5.98729232 |
| H | 1.80114290  | 14.44922105 | 7.35175032 |
| H | 0.06198440  | 14.89962728 | 7.31845426 |
| C | -0.97500388 | 13.39074390 | 4.92096368 |
| H | -1.74075900 | 13.76262916 | 5.61173295 |
| H | -1.33485049 | 12.48298380 | 4.42985174 |
| H | -0.78091020 | 14.14617054 | 4.15303231 |

**TA-TS2**

*E*: -5510.35

*H*: -5259.59

*G*: -5325.03

$N_{\text{imag}} = 1$  (-28.9197  $\text{cm}^{-1}$ )

|    |             |             |            |
|----|-------------|-------------|------------|
| Pt | 3.66040443  | 9.93360841  | 4.98152626 |
| Pt | 1.93279913  | 11.63676032 | 6.35035796 |
| Si | 0.66066719  | 12.96759060 | 7.70262043 |
| Cl | 1.30473738  | 8.09894251  | 6.09461272 |
| Cl | 1.27223706  | 15.00238491 | 7.71708299 |
| Cl | 0.71164207  | 12.34352191 | 9.72686876 |
| Cl | -1.43242721 | 13.19068168 | 7.43547370 |
| P  | 4.85377544  | 9.30491333  | 6.84870380 |
| P  | 3.88650239  | 12.08007481 | 7.56995838 |
| P  | 0.18932037  | 11.24391943 | 4.83245130 |
| P  | 2.58146228  | 10.57077102 | 3.10222617 |
| C  | 4.51895582  | 7.66281498  | 7.59292477 |
| H  | 3.43555950  | 7.56989095  | 7.71630336 |
| H  | 5.04532582  | 7.54834667  | 8.54714237 |
| H  | 4.85014402  | 6.88847200  | 6.89332132 |
| C  | 6.69101243  | 9.33606334  | 6.67717048 |
| H  | 6.98487484  | 8.62080396  | 5.90265674 |
| H  | 7.17590442  | 9.06687352  | 7.62285386 |
| H  | 7.01379978  | 10.33388306 | 6.36816337 |

|   |             |             |            |
|---|-------------|-------------|------------|
| C | 4.55497274  | 10.49671879 | 8.23873336 |
| H | 5.45837227  | 10.66002234 | 8.83802675 |
| H | 3.77144491  | 10.08419091 | 8.88370760 |
| C | 5.18832456  | 12.79779497 | 6.48888422 |
| H | 5.28135569  | 12.17670033 | 5.59323170 |
| H | 6.14061900  | 12.86437565 | 7.02674099 |
| H | 4.86466500  | 13.80173869 | 6.19643405 |
| C | 3.99281828  | 13.18001844 | 9.04081607 |
| H | 3.65913421  | 14.18615862 | 8.78016293 |
| H | 5.03793697  | 13.21160586 | 9.36731776 |
| H | 3.36512416  | 12.79704151 | 9.84629701 |
| C | -0.47799488 | 12.78056298 | 4.06476408 |
| H | 0.33666385  | 13.35501495 | 3.61871349 |
| H | -0.96662771 | 13.39074729 | 4.82537739 |
| H | -1.20477939 | 12.51570412 | 3.28890169 |
| C | -1.28718614 | 10.30990463 | 5.37449567 |
| H | -1.96900936 | 10.18851088 | 4.52529248 |
| H | -1.78963008 | 10.84859135 | 6.17900933 |
| H | -0.93345371 | 9.33794924  | 5.73118341 |
| C | 0.77653909  | 10.29949935 | 3.35793598 |
| H | 0.16642227  | 10.53203230 | 2.47699211 |
| H | 0.68213537  | 9.24047043  | 3.62588349 |
| C | 2.75203300  | 12.30888886 | 2.51939480 |
| H | 3.78244596  | 12.45538283 | 2.18094579 |
| H | 2.56861487  | 12.98700727 | 3.35656303 |
| H | 2.06239593  | 12.52729407 | 1.69614283 |
| C | 2.94139931  | 9.58345426  | 1.59000941 |
| H | 2.30052791  | 9.90174300  | 0.75941073 |
| H | 2.76401517  | 8.52584751  | 1.80565476 |
| H | 3.99174856  | 9.71736004  | 1.31324734 |

**AF-RC**

*E*: -5481.06

*H*: -5230.32

*G*: -5296.24

$N_{\text{imag}} = 0$

|    |             |            |             |
|----|-------------|------------|-------------|
| Pt | -1.69557035 | 0.37433772 | 1.28399741  |
| Pt | -0.81716474 | 1.18049507 | -1.33423083 |
| Cl | 1.39108205  | 1.15027817 | 2.74394222  |
| Cl | 1.86643730  | 3.02596804 | -0.05058174 |

|   |             |             |             |
|---|-------------|-------------|-------------|
| P | -3.39361214 | 1.96526289  | 0.81670179  |
| P | -1.72734764 | 3.23897708  | -1.49131311 |
| P | -0.78821446 | -1.16970650 | -1.66116591 |
| P | -0.85424131 | -1.71512621 | 1.40940414  |
| C | -4.70664217 | 1.12310167  | -0.17393759 |
| H | -5.54886168 | 1.79488969  | -0.37540134 |
| H | -5.06491376 | 0.24497838  | 0.37218502  |
| H | -4.26657675 | 0.79002125  | -1.11821469 |
| C | -4.33775171 | 2.67205533  | 2.23339588  |
| H | -5.15427023 | 3.31711526  | 1.88858475  |
| H | -3.64617276 | 3.24755532  | 2.85501149  |
| H | -4.74661123 | 1.85020292  | 2.83001746  |
| C | -3.06388350 | 3.47958882  | -0.21467328 |
| H | -3.99595106 | 3.78819770  | -0.70242111 |
| H | -2.74256700 | 4.26932649  | 0.46528095  |
| C | -0.81507405 | 4.83317527  | -1.47822102 |
| H | -1.51232771 | 5.66942906  | -1.60311102 |
| H | -0.09186259 | 4.82613922  | -2.29921392 |
| H | -0.27631249 | 4.92375751  | -0.53382540 |
| C | -2.67188923 | 3.33786196  | -3.07772637 |
| H | -3.23272041 | 4.27821928  | -3.13575509 |
| H | -3.36618210 | 2.49487600  | -3.14312791 |
| H | -1.96958330 | 3.27980817  | -3.91453513 |
| C | 0.22869724  | -1.84432372 | -3.04268002 |
| H | 0.08592137  | -2.92543269 | -3.15434073 |
| H | 1.28002276  | -1.62750838 | -2.83385480 |
| H | -0.05731178 | -1.33885908 | -3.97070750 |
| C | -2.49958477 | -1.70169702 | -2.11153384 |
| H | -2.54099290 | -2.77511153 | -2.32907305 |
| H | -2.83411895 | -1.13996188 | -2.98917757 |
| H | -3.16476025 | -1.46909694 | -1.27503230 |
| C | -0.38407303 | -2.34964407 | -0.27900276 |
| H | 0.69527386  | -2.50490014 | -0.29256303 |
| H | -0.88298297 | -3.30677749 | -0.47097684 |
| C | -2.21820303 | -2.86343041 | 1.89903295  |
| H | -1.88235209 | -3.90596355 | 1.84925849  |
| H | -3.07225957 | -2.72331555 | 1.22980774  |
| H | -2.53093882 | -2.62940859 | 2.92092757  |
| C | 0.52732402  | -2.26669564 | 2.48686797  |
| H | 0.69791953  | -3.34213782 | 2.36273619  |
| H | 0.26476671  | -2.04930139 | 3.52653505  |

|    |             |             |             |
|----|-------------|-------------|-------------|
| H  | 1.42543468  | -1.70543858 | 2.22471869  |
| Si | 0.48813836  | 1.56942761  | 0.80447106  |
| Cl | -0.62760923 | 3.34738395  | 1.81085199  |
| Cl | 1.84338743  | -0.09978971 | -0.08765138 |

### AF-TS1

*E*: -5471.59

*H*: -5222.08

*G*: -5286.07

$N_{\text{imag}} = 1$  (-100.9625  $\text{cm}^{-1}$ )

|    |             |             |             |
|----|-------------|-------------|-------------|
| Pt | -1.87169416 | 0.40182147  | 1.22161204  |
| Pt | -0.98879192 | 0.99507706  | -1.43799244 |
| Cl | 0.20359161  | 1.28576442  | 3.20527432  |
| Cl | 1.78112826  | 2.30920129  | -0.96378024 |
| P  | -3.23053980 | 2.26492244  | 1.29877478  |
| P  | -2.19701783 | 2.95415288  | -1.57367547 |
| P  | -0.20663073 | -1.13813620 | -1.82933639 |
| P  | -1.25458175 | -1.81408217 | 1.04089913  |
| C  | -4.99030693 | 1.74047531  | 1.09661328  |
| H  | -5.66635364 | 2.60143599  | 1.15883494  |
| H  | -5.24240550 | 1.02331803  | 1.88373649  |
| H  | -5.10797630 | 1.24791809  | 0.12698934  |
| C  | -3.26346559 | 3.26113167  | 2.84227105  |
| H  | -3.95581315 | 4.10635389  | 2.75652710  |
| H  | -2.24960315 | 3.61589426  | 3.04221187  |
| H  | -3.57416106 | 2.60981096  | 3.66517554  |
| C  | -3.04798543 | 3.55315211  | -0.03188667 |
| H  | -4.03031288 | 3.96743181  | -0.28474682 |
| H  | -2.43021503 | 4.35062828  | 0.38293967  |
| C  | -1.35774996 | 4.46128405  | -2.20474441 |
| H  | -2.04338344 | 5.31586602  | -2.22921159 |
| H  | -0.98730046 | 4.25373833  | -3.21337420 |
| H  | -0.50594853 | 4.67632218  | -1.55489378 |
| C  | -3.60735616 | 2.72583722  | -2.74394960 |
| H  | -4.19222630 | 3.64854649  | -2.83464918 |
| H  | -4.24947294 | 1.91820222  | -2.38034408 |
| H  | -3.21567389 | 2.44511960  | -3.72625411 |
| C  | 1.46608403  | -1.33990447 | -2.56092296 |
| H  | 1.71092966  | -2.39846242 | -2.70414906 |
| H  | 2.19108568  | -0.86957695 | -1.89215443 |

|    |             |             |             |
|----|-------------|-------------|-------------|
| H  | 1.48703885  | -0.82054508 | -3.52396245 |
| C  | -1.31173921 | -1.98521918 | -3.04258420 |
| H  | -0.95457358 | -3.00002929 | -3.25302235 |
| H  | -1.33373811 | -1.40716351 | -3.97129976 |
| H  | -2.32604295 | -2.03005371 | -2.63513561 |
| C  | -0.19402476 | -2.32778906 | -0.39956093 |
| H  | 0.83269140  | -2.37566971 | -0.03453403 |
| H  | -0.49043606 | -3.32567104 | -0.74144253 |
| C  | -2.76731203 | -2.84688733 | 0.80085206  |
| H  | -2.51094064 | -3.91127255 | 0.74170267  |
| H  | -3.27010232 | -2.53641150 | -0.11971301 |
| H  | -3.44887680 | -2.68377113 | 1.64124171  |
| C  | -0.42429741 | -2.60999226 | 2.47379615  |
| H  | -0.19667147 | -3.66223989 | 2.26872582  |
| H  | -1.08872069 | -2.53683303 | 3.34048585  |
| H  | 0.49211991  | -2.05542247 | 2.68935876  |
| Si | 0.27496709  | 1.47957624  | 0.63102800  |
| Cl | -0.03333837 | 3.58458175  | 1.13454631  |
| Cl | 1.75619806  | -0.10442063 | 0.90678597  |

#### AF-I

*E*: -5517.36

*H*: -5266.80

*G*: -5330.90

$N_{\text{imag}} = 0$

|    |             |             |             |
|----|-------------|-------------|-------------|
| Pt | -0.22799846 | 0.01012918  | 0.21481165  |
| Pt | -2.88387338 | 1.08437523  | -0.14917539 |
| Cl | 1.89995860  | -0.84622781 | -0.76206354 |
| Cl | -3.71330717 | 1.40159432  | 2.85012415  |
| P  | -1.12992550 | -2.10508229 | -0.15451868 |
| P  | -3.98813843 | -0.92293441 | -0.37480117 |
| P  | -2.28543264 | 3.29721487  | -0.35731370 |
| P  | 0.59192347  | 2.16049773  | -0.14211907 |
| C  | -0.96353449 | -2.46774086 | -1.94920468 |
| H  | -1.43838645 | -3.42368167 | -2.19544008 |
| H  | 0.10040623  | -2.49532049 | -2.19557096 |
| H  | -1.42979044 | -1.66137191 | -2.52135235 |
| C  | -0.32921858 | -3.53489843 | 0.66796722  |
| H  | -0.75374824 | -4.48005407 | 0.31237973  |
| H  | -0.47040993 | -3.44343067 | 1.74782767  |

|    |             |             |             |
|----|-------------|-------------|-------------|
| H  | 0.74008913  | -3.49588630 | 0.44038584  |
| C  | -2.93720495 | -2.36478245 | 0.15334078  |
| H  | -3.26354034 | -3.29969450 | -0.31765822 |
| H  | -3.05729287 | -2.45717797 | 1.23632724  |
| C  | -5.49597667 | -1.16266124 | 0.65228074  |
| H  | -5.87364357 | -2.18790158 | 0.56729134  |
| H  | -6.26259105 | -0.45665848 | 0.31937960  |
| H  | -5.24654949 | -0.93828215 | 1.69303704  |
| C  | -4.55266379 | -1.40212652 | -2.06549015 |
| H  | -4.99416651 | -2.40556849 | -2.06391951 |
| H  | -3.70822472 | -1.37465611 | -2.75857538 |
| H  | -5.29756775 | -0.67348488 | -2.39889947 |
| C  | -3.20339516 | 4.50817544  | 0.68033189  |
| H  | -2.76412189 | 5.50911958  | 0.60186681  |
| H  | -3.17747081 | 4.16595877  | 1.71857240  |
| H  | -4.24587204 | 4.53399031  | 0.34945775  |
| C  | -2.36052530 | 4.04712188  | -2.04221129 |
| H  | -1.98354704 | 5.07650397  | -2.03263016 |
| H  | -3.40238787 | 4.04041704  | -2.37603065 |
| H  | -1.77039001 | 3.44754105  | -2.73975022 |
| C  | -0.52744627 | 3.60188649  | 0.17132860  |
| H  | -0.54905163 | 3.74824443  | 1.25474456  |
| H  | -0.11260677 | 4.50244636  | -0.29695204 |
| C  | 0.96550648  | 2.31502969  | -1.93563125 |
| H  | 1.29016812  | 3.33327367  | -2.17584167 |
| H  | 0.06989545  | 2.06392228  | -2.50998456 |
| H  | 1.74885868  | 1.59571839  | -2.18540117 |
| C  | 2.16025164  | 2.62804973  | 0.68471010  |
| H  | 2.51261815  | 3.60418890  | 0.33410702  |
| H  | 2.90210798  | 1.85764104  | 0.45477682  |
| H  | 1.99357126  | 2.65550369  | 1.76448251  |
| Si | -1.81072840 | 0.64348023  | 1.95154565  |
| Cl | -1.81423239 | -1.15772230 | 3.16738999  |
| Cl | -0.57234063 | 1.94333184  | 3.17513086  |

**AF-TS2**

*E*: -5510.37

*H*: -5260.18

*G*: -5323.77

$N_{\text{imag}} = 1$  (-34.3459  $\text{cm}^{-1}$ )

|    |             |             |             |
|----|-------------|-------------|-------------|
| Pt | 1.62541572  | 0.53892153  | -0.02102627 |
| Pt | -1.60400636 | 0.18703101  | 0.03756810  |
| Cl | 3.87051154  | -0.56484024 | 0.00907231  |
| Cl | -3.33217245 | 2.40376361  | -0.09535380 |
| P  | 1.52994600  | 0.10915576  | 2.27069166  |
| P  | -1.61169077 | -0.06396512 | 2.34032180  |
| P  | -1.52654690 | -0.27978112 | -2.23944825 |
| P  | 1.57933674  | 0.30240169  | -2.33630623 |
| C  | 1.79289472  | -1.69275299 | 2.51184965  |
| H  | 1.69455020  | -1.95266848 | 3.57136141  |
| H  | 2.78792610  | -1.95041903 | 2.14355237  |
| H  | 1.05135747  | -2.23864149 | 1.92252941  |
| C  | 2.79940200  | 0.91492125  | 3.32026020  |
| H  | 2.75639051  | 0.54150092  | 4.34907575  |
| H  | 2.63022490  | 1.99567700  | 3.31041129  |
| H  | 3.78005141  | 0.70223040  | 2.88492892  |
| C  | -0.03797165 | 0.41086324  | 3.20585047  |
| H  | 0.02578644  | -0.10263784 | 4.17279875  |
| H  | -0.09864003 | 1.48553290  | 3.38990635  |
| C  | -2.85609228 | 0.93720521  | 3.24703217  |
| H  | -2.74830150 | 0.82012579  | 4.33096925  |
| H  | -3.85344395 | 0.61624554  | 2.93241421  |
| H  | -2.73289291 | 1.98347497  | 2.95601706  |
| C  | -1.93718937 | -1.77871286 | 2.93899058  |
| H  | -1.93936536 | -1.81734390 | 4.03469084  |
| H  | -1.17798710 | -2.45856603 | 2.54554455  |
| H  | -2.91510339 | -2.09497603 | 2.56302495  |
| C  | -2.92673589 | 0.39786260  | -3.21763074 |
| H  | -2.79210685 | 0.22091965  | -4.29041359 |
| H  | -3.00110952 | 1.46820062  | -3.00533039 |
| H  | -3.85093891 | -0.07771396 | -2.87541611 |
| C  | -1.52574501 | -2.07165357 | -2.67669013 |
| H  | -1.47941104 | -2.21541521 | -3.76267137 |
| H  | -2.44560042 | -2.52079450 | -2.28931589 |
| H  | -0.67550456 | -2.56387670 | -2.19871286 |
| C  | -0.07184903 | 0.40012930  | -3.17122249 |
| H  | -0.28707130 | 1.45953149  | -3.32753875 |
| H  | -0.00161430 | -0.08624749 | -4.15168097 |
| C  | 2.16444063  | -1.37322003 | -2.80932262 |
| H  | 2.06664860  | -1.51148797 | -3.89140897 |
| H  | 1.57245711  | -2.12645893 | -2.28374318 |

|    |             |             |             |
|----|-------------|-------------|-------------|
| H  | 3.20599592  | -1.47907586 | -2.50008118 |
| C  | 2.62588844  | 1.43869110  | -3.32449490 |
| H  | 2.58179853  | 1.18817022  | -4.38994077 |
| H  | 3.65508500  | 1.34806020  | -2.96400318 |
| H  | 2.28008887  | 2.46372138  | -3.16717274 |
| Si | -0.18233144 | 1.97951141  | -0.00321606 |
| Cl | -0.22728133 | 3.34786052  | 1.61698516  |
| Cl | -0.23749320 | 3.35954009  | -1.61370577 |

## References

1. C. Brunecker, M. Arrowsmith, J. H. Müssig, J. Böhnke, A. Stoy, M. Heß, A. Hofmann, C. Lenczyk, C. Lichtenberg, J. Ramler, A. Rempel and H. Braunschweig, *Dalton Trans.*, 2021, **50**, 3506–3515.
2. L. Manojlović-Muir, K. W. Muir and T. Solomun, *Acta Cryst. B*, 1979, **35**, 1237–1239.
3. C. Brunecker, J. H. Müssig, M. Arrowsmith, F. Fantuzzi, A. Stoy, J. Böhnke, A. Hofmann, R. Bertermann, B. Engels and H. Braunschweig, *Chem. Eur. J.*, 2020, **26**, 8518–8523.
4. a) M. C. Grossel, J. R. Batson, R. P. Moulding and K. R. Seddon, *J. Organomet. Chem.*, 1986, **304**, 391–423; b) M. P. Brown, R. J. Puddephatt, L. Rashidi and K. R. Seddon, *J. Chem. Soc., Dalton Trans.*, 1978, 516–522.
5. G. M. Sheldrick, *Acta Cryst. A*, 2015, **71**, 3–8.
6. G. M. Sheldrick, *Acta Cryst. A*, 2008, **64**, 112–122.
7. A.L. Spek, *Acta Cryst. C*, 2015, **71**, 9–18.
8. a) G. te Velde, F. M. Bickelhaupt, E. J. Baerends, C. Fonseca Guerra, S. J. A. van Gisbergen, J. G. Snijders and T. Ziegler, *J. Comput. Chem.*, 2001, **22**, 931–967; b) C. Fonseca Guerra, J. G. Snijders, G. te Velde and E. J. Baerends, *Theor. Chem. Acc.*, 1998, **99**, 391–403; c) ADF 2023.1, SCM, Theoretical Chemistry, Vrije Universiteit Amsterdam, Amsterdam, The Netherlands, [www.scm.com](http://www.scm.com); d) AMS 2023.1, SCM, Theoretical Chemistry, Vrije Universiteit Amsterdam, Amsterdam, The Netherlands, [www.scm.com](http://www.scm.com).
9. a) A. D. Becke, *Phys. Rev. A*, 1988, **38**, 3098–3100; b) C. Lee, W. Yang and R. G. Parr, *Phys. Rev. B*, 1988, **37**, 785–789; c) Q. Wu and W. Yang, *J. Chem. Phys.*, 2002, **116**, 515–524.
10. a) S. Grimme, *J. Comput. Chem.*, 2004, **25**, 1463–1473; b) S. Grimme, *J. Comput. Chem.*, 2006, **27**, 1787–1799; c) S. Grimme, J. Antony, S. Ehrlich and H. Krieg, *J. Chem. Phys.*, 2010, **132**, Article 154104; d) S. Grimme, S. Ehrlich and L. Goerigk, *J. Comput. Chem.*, 2011, **32**, 1456; e) A. D. Becke and E. R. Johnson, *J. Chem. Phys.*, 2005, **122**, Article 154101; f) E. R. Johnson and A. D. Becke, *J. Chem. Phys.*, 2006, **124**, Article 024101.
11. a) A. E. van Lenthe, A. Ehlers and E. J. Baerends, *J. Chem. Phys.*, 1999, **110**, 8943–8953; b) E. van Lenthe, E. J. Baerends and J. G. Snijders, *J. Chem. Phys.*, 1994, **101**, 9783–9792.

12. a) A. Diefenbach and F. M. Bickelhaupt, *J. Phys. Chem. A*, 2004, **108**, 8460–8466; b) G. T. de Jong, M. Solà, L. Visscher and F. M. Bickelhaupt, *J. Chem. Phys.*, 2004, **121**, 9982–9991; c) T. Hansen, X. Sun, M. Dalla Tiezza, W.-J. van Zeist, J. N. P. van Stralen, D. P. Geerke, L. P. Wolters, J. Poater, T. A. Hamlin and F. M. Bickelhaupt, *Chem. Eur. J.*, 2022, **28**, e202201093; d) J. N. P. van Stralen and F. M. Bickelhaupt, *Organometallics*, 2006, **25**, 4260–4264; e) N. Arnold, R. Bertermann, F. M. Bickelhaupt, H. Braunschweig, M. Drisch, M. Finze, F. Hupp, J. Poater and J. A. P. Sprenger, *Chem. Eur. J.*, 2017, **23**, 5948–5955.
13. M. B. Brands, J. Nitsch and C. Fonseca Guerra, *Inorg. Chem.*, 2018, **57**, 2603–2613.
14. a) A. Klamt and G. Schüürmann, *J. Chem. Soc. Perkin Trans. 2*, 1993, 799–805; b) A. Klamt, *J. Phys. Chem.*, 1995, **99**, 2224–2235; c) C. C. Pye and T. Ziegler, *Theor. Chem. Acc.*, 1999, **101**, 396–408.
15. E. van Lenthe and J. Baerends, *J. Comput. Chem.*, 2003, **24**, 1142–1156.
16. a) M. Franchini, P. H. T. Philipsen, E. van Lenthe and L. Visscher, *J. Chem. Theory Comput.* 2014, **10**, 1994–2004; b) A. D. Becke, *J. Chem. Phys.*, 1993, **88**, 2547–2553; c) M. Franchini, P. H. T. Philipsen and L. Visscher, *J. Comput. Chem.*, 2013, **34**, 1819–1827.
17. a) S. K. Wolff, *Int. J. Quantum Chem.*, 2005, **104**, 645–659; b) A. Bérces, R. M. Dickson, L. Fan, H. Jacobsen, D. P. Swerhone and T. Ziegler, *Comput. Phys. Commun.*, 1997, **100**, 247–262; c) H. Jacobsen, A. Bérces, D. P. Swerhone and T. Ziegler, *Comput. Phys. Commun.*, 1997, **100**, 263–284.
18. a) K. Fukui, *Acc. Chem. Res.*, 1981, **14**, 363–368; b) L. Deng, T. Ziegler and L. A. Fan, *J. Chem. Phys.*, 1993, **99**, 3823–3828; c) L. Deng and T. Ziegler, *Int. J. Quantum Chem.*, 1994, **52**, 731–738.
19. C. Y. Legault, CYLview20, Université de Sherbrooke, Sherbrooke, Quebec, Canada, 2020, [www.cylview.org](http://www.cylview.org).
20. a) F. M. Bickelhaupt and E. J. Baerends, in *Reviews in Computational Chemistry*, ed. K. B. Lipkowitz and D. B. Boyd, Wiley-VCH, New York, 2000, **15**, pp. 1–86; b) T. A. Hamlin, P. Vermeeren, C. Fonseca Guerra and F. M. Bickelhaupt, in *Complementary Bonding Analysis*, ed. S. Grabowsky, De Gruyter, Berlin, 2021, **8**, pp. 199–212.
